# Supplementary material for: Awareness and perception of COVID-19 among the general population: A Middle Eastern survey
Source: PLoS One. 2021 Apr 22;16(4):e0250461. doi: 10.1371/journal.pone.0250461 (PMC8062075; doi:10.1371/journal.pone.0250461)
Supplement: S2 Data — (XLSX) [file pone.0250461.s003.xlsx]

## Sheet: Iraq
Sex	Age	Educational	General_awareness	Precuationary_awareness	Social Media	TV	News_Sites	Newspapers	Official_Reports	Friends_Family	Medical_Staff	Fever	Cough	Sneezing	Dyspnea	Fatigue and Weakness	Chest pain	Diarrhea	Headache	Sore throat	Symptoms_SCORE	Serious	Air	Droplet	Contaminated_Surfaces	Food_Drinks	Pets	Handshaking	Transmission_SCORE	Hand Washing with Soap and Water	Alcohol	Wear_Gags	Crowded_places	Handshaking_kissing	Precautionary_SCORE	No_treatment	Antibiotics	Antipyretic	Pindolol_paracetamol	Drinking_liquids	Herbal_remedy	Vitamins	Treatment_SCORE	Death	Organ_failure	Immune_deficiency	Permanent_disability	No_side_effects	Mortality_Rate
1	5	3	1	1	0	0	0	0	0	0	1	1	1	1	1	0	0	0	1	0	5	3	0	0	1	1	1	0	3	1	1	0	1	1	4	0	1	1	0	0	1	0	3	1	1	1	0	0	2
1	4	3	2	2	0	0	1	0	0	0	0	1	1	0	1	0	0	0	0	1	4	0	0	1	1	1	1	1	5	1	1	1	1	1	5	1	1	0	0	1	1	1	5	1	1	0	0	0	0
1	5	3	1	1	0	0	0	0	1	0	1	1	1	1	1	1	1	1	1	1	9	3	0	1	1	1	1	1	5	1	0	1	1	1	4	1	1	0	1	1	1	1	6	1	1	0	0	0	1
1	4	3	1	1	1	0	0	0	0	0	0	1	0	0	1	1	0	0	0	1	4	3	0	1	1	1	1	1	5	0	1	0	1	1	3	1	1	0	0	1	1	0	4	1	1	0	0	0	4
1	3	3	1	1	1	0	1	0	0	0	1	1	1	1	1	1	0	0	0	0	5	5	0	1	1	1	1	1	5	1	0	0	1	1	3	1	1	0	1	0	1	0	4	1	0	0	0	0	1
1	4	2	2	2	0	1	1	0	0	1	0	1	1	1	1	1	1	0	1	0	7	3	0	1	1	0	0	1	3	1	0	0	1	1	3	1	1	1	0	0	1	0	4	1	0	1	0	0	3
1	1	3	2	2	0	0	0	0	0	0	1	1	0	0	1	1	0	0	1	1	5	0	0	1	1	0	1	1	4	1	1	1	1	1	5	1	1	0	1	0	1	0	4	1	1	0	0	0	7
1	1	2	1	1	0	0	0	0	0	0	1	1	1	0	1	1	0	1	1	0	6	3	1	1	1	1	1	0	5	1	1	1	1	1	5	1	1	0	0	1	1	1	5	1	1	0	0	0	1
1	3	3	2	1	1	0	0	0	0	0	0	1	1	1	1	0	0	0	0	1	5	0	0	1	1	1	1	1	5	1	1	0	1	1	4	0	1	1	0	0	1	1	4	1	0	0	0	0	0
1	4	3	1	1	1	1	0	0	0	0	0	1	1	1	1	0	1	0	0	0	5	0	0	1	1	1	1	1	5	1	0	1	1	1	4	0	0	1	0	0	1	1	3	1	1	0	0	0	2
1	4	3	1	1	1	1	0	0	0	0	0	1	1	1	1	0	1	0	0	0	5	0	0	1	1	1	1	1	5	1	0	1	1	1	4	0	0	1	0	0	1	1	3	1	1	0	0	0	2
0	5	3	1	1	1	1	1	0	1	1	1	1	1	1	1	0	1	0	1	1	7	3	0	1	1	1	1	1	5	1	1	0	1	1	4	1	1	0	1	0	0	0	3	1	1	1	0	0	1
0	3	2	1	1	1	1	0	0	1	0	1	1	1	1	1	0	1	0	1	1	7	3	0	1	0	1	1	0	3	1	1	1	1	1	5	1	1	0	0	1	1	1	5	1	1	0	0	0	1
0	4	3	1	1	1	0	0	0	1	0	1	1	1	0	1	1	0	0	0	0	4	3	1	1	1	0	1	1	5	1	1	1	1	1	5	1	1	0	0	0	1	0	3	1	1	0	0	0	1
0	5	3	0	2	1	0	1	0	0	0	0	1	1	0	0	0	0	0	1	1	4	3	0	0	1	1	1	0	3	0	1	0	1	0	2	0	1	0	0	1	1	0	3	0	0	1	0	0	2
0	4	3	1	1	1	1	1	1	1	1	1	1	1	1	1	1	1	0	1	1	8	3	1	1	1	1	1	1	6	1	0	1	1	1	4	1	1	0	0	0	1	0	3	1	1	1	0	0	2
0	6	3	1	1	1	1	1	0	0	0	0	1	1	1	1	1	0	0	0	0	5	0	0	0	1	1	1	0	3	1	1	0	1	1	4	1	1	0	0	0	1	0	3	1	0	1	0	0	6
0	5	3	2	1	0	1	0	0	1	1	0	1	1	0	1	1	1	0	0	1	6	0	0	0	1	1	1	1	4	1	0	1	1	1	4	1	1	0	0	1	1	0	4	1	1	0	0	0	1
1	4	3	1	1	0	0	0	0	0	0	1	1	1	0	1	1	1	1	1	1	8	3	0	1	1	1	1	1	5	1	0	0	1	1	3	1	1	0	1	0	1	0	4	0	0	0	0	1	1
0	4	3	1	1	1	0	1	0	1	0	1	1	1	0	1	0	0	0	1	1	5	3	0	1	1	1	1	1	5	1	0	1	1	1	4	1	1	0	0	0	1	0	3	1	1	1	0	0	2
0	6	2	1	1	1	1	1	0	1	0	1	1	1	1	1	1	1	1	1	1	9	3	0	1	1	1	1	1	5	1	1	0	1	1	4	1	1	0	0	0	1	0	3	1	0	1	0	0	2
1	2	3	1	1	1	1	1	0	1	0	1	1	1	0	1	1	0	1	1	0	6	3	0	1	1	1	1	1	5	1	1	1	1	1	5	1	1	0	0	1	1	0	4	1	1	1	0	0	4
1	4	3	1	1	0	0	0	0	1	0	1	1	0	0	1	0	1	0	0	0	3	3	0	1	1	1	1	1	5	1	1	1	1	1	5	1	1	0	0	1	1	1	5	1	0	0	0	0	4
0	3	3	1	1	0	0	0	0	1	0	1	1	1	1	1	0	1	0	0	1	6	3	0	0	1	1	1	1	4	1	1	1	1	1	5	1	1	0	0	1	1	1	5	1	0	0	0	0	2
0	6	3	1	1	0	1	1	0	0	0	1	1	1	1	1	1	1	0	0	1	7	3	1	1	1	1	1	1	6	1	0	1	1	1	4	1	1	0	0	1	1	1	5	1	0	0	0	0	6
0	5	3	1	1	1	1	1	1	0	0	1	1	1	1	1	1	0	0	1	1	7	3	0	1	1	1	1	1	5	1	1	0	1	1	4	1	1	1	1	0	1	1	6	1	1	0	0	0	1
1	4	3	1	1	0	0	0	1	1	0	1	1	1	1	1	0	0	0	0	1	5	2	0	1	1	1	1	1	5	1	1	1	1	1	5	0	1	0	1	1	1	0	4	1	1	0	0	0	1
0	5	3	2	2	0	1	0	1	0	0	0	1	0	1	1	0	0	0	0	1	4	3	0	1	1	1	0	1	4	1	1	1	1	1	5	0	1	0	1	0	1	0	3	1	1	1	0	0	1
1	3	3	1	1	1	1	0	0	1	0	1	1	1	1	1	1	0	0	0	0	5	3	1	1	1	0	0	1	4	1	1	1	1	1	5	0	1	1	1	0	1	0	4	1	1	0	0	0	1
0	5	3	2	2	0	1	0	1	0	0	0	1	0	1	1	0	0	0	0	1	4	3	0	1	1	1	0	1	4	1	1	1	1	1	5	0	1	0	1	0	1	0	3	1	1	0	0	0	1
0	5	3	1	1	1	1	0	0	0	0	1	1	1	0	1	0	0	0	0	0	3	3	1	1	1	1	1	1	6	1	1	0	1	1	4	1	1	0	0	0	1	0	3	1	1	1	0	0	1
0	5	2	2	2	0	1	0	0	0	1	0	1	0	0	1	0	1	0	1	0	4	3	1	0	0	1	1	1	4	0	1	0	1	0	2	0	1	1	1	1	1	1	6	1	1	0	0	0	1
1	4	3	1	1	0	0	1	1	1	0	1	1	1	1	1	0	0	0	0	1	5	2	0	1	1	1	1	1	5	1	1	1	1	1	5	0	1	0	1	1	1	0	4	1	1	0	0	0	1
1	0	2	2	1	1	1	0	0	0	1	1	1	0	0	1	0	1	0	1	0	4	3	0	1	1	1	1	1	5	0	1	1	1	1	4	0	0	0	0	1	1	0	2	1	1	1	0	0	3
1	2	3	2	2	1	0	0	0	0	0	1	1	0	0	0	1	0	0	0	1	3	0	0	1	1	1	1	0	4	1	0	1	1	0	3	0	1	0	1	1	1	0	4	1	1	0	0	0	2
1	3	3	1	1	0	0	0	0	0	0	1	1	1	0	1	1	0	0	0	0	4	0	0	1	0	1	1	0	3	0	0	0	1	1	2	0	1	0	0	1	0	0	2	0	0	0	0	1	1
1	3	2	2	2	1	1	0	0	0	1	0	1	0	1	1	0	1	0	0	0	4	3	0	1	1	0	1	0	3	0	1	0	1	1	3	0	1	0	1	0	1	0	3	1	0	1	0	0	2
1	4	3	2	1	0	0	0	0	0	0	1	1	1	0	1	0	1	1	1	0	6	5	0	1	1	0	0	1	3	0	1	0	1	1	3	1	1	0	0	1	1	0	4	1	1	0	0	0	1
1	4	3	1	1	0	0	0	0	1	0	1	1	1	0	1	1	1	0	1	1	7	3	0	1	1	1	1	1	5	1	1	1	1	0	4	1	1	1	0	0	1	0	4	1	1	0	0	0	1
0	2	3	1	1	0	0	1	0	1	1	0	1	0	0	1	0	1	0	0	0	3	3	0	1	1	1	1	1	5	1	1	0	1	1	4	1	1	0	0	1	1	1	5	1	0	0	0	0	3
0	6	3	2	1	0	1	0	1	1	0	1	1	1	1	1	0	1	0	1	1	7	8	0	1	1	1	1	1	5	1	1	0	1	1	4	1	1	0	0	1	1	0	4	1	0	1	1	0	3
0	2	2	2	2	0	0	1	0	1	0	0	1	1	1	1	1	1	1	1	0	8	3	0	1	1	1	1	0	4	1	0	1	1	1	4	0	1	0	0	0	1	1	3	1	0	0	0	0	1
1	3	3	1	1	1	1	1	1	1	1	1	1	1	0	1	1	1	0	1	1	7	3	0	0	1	1	1	0	3	1	1	1	1	1	5	0	1	0	1	0	1	1	4	1	0	0	0	0	2
1	2	3	2	2	1	0	0	0	0	0	0	1	1	0	1	1	0	0	1	1	6	0	0	0	0	1	1	1	3	1	0	1	1	1	4	0	1	1	1	0	1	1	5	1	0	0	0	1	4
0	4	3	2	2	1	1	1	0	1	0	1	0	1	0	1	1	1	0	0	0	4	3	0	1	1	1	1	1	5	1	1	0	1	1	4	1	1	0	1	0	1	0	4	1	0	0	0	0	2
0	3	3	1	1	1	0	0	0	0	0	0	1	1	0	1	0	0	0	0	0	3	1	0	0	1	1	1	1	4	1	0	1	0	1	3	1	1	0	0	1	1	1	5	1	0	0	0	0	2
1	0	2	1	1	1	0	0	0	0	0	0	1	0	0	1	1	0	0	0	0	3	3	0	0	1	1	1	1	4	1	0	1	1	1	4	1	1	0	0	1	1	1	5	1	1	0	0	0	1
0	4	2	1	1	1	1	0	0	1	0	0	1	1	0	1	1	0	0	0	0	4	0	0	1	1	1	1	1	5	1	1	0	1	1	4	0	1	1	1	1	1	0	5	1	0	0	0	0	2
1	0	2	2	1	0	1	0	0	0	0	1	1	0	1	1	0	1	0	1	1	6	0	0	1	1	1	1	1	5	0	1	1	1	1	4	0	0	1	0	0	1	0	2	1	1	1	0	0	5
1	1	3	2	2	1	0	0	0	0	1	0	0	1	0	1	0	0	0	0	0	2	3	0	1	1	1	1	0	4	1	0	0	1	0	2	1	1	0	0	1	1	1	5	1	0	0	0	0	3
1	2	3	2	1	1	1	0	0	0	1	0	1	1	0	1	1	1	0	0	0	5	3	0	0	1	1	1	1	4	1	0	0	1	1	3	0	1	1	0	1	1	0	4	1	0	0	0	0	1
0	0	2	2	1	1	1	0	0	0	0	1	1	0	0	1	0	0	0	0	1	3	0	0	1	1	1	1	1	5	0	1	0	1	0	2	1	1	0	0	1	1	1	5	1	0	0	0	0	1
1	2	3	2	1	1	1	0	0	1	0	1	1	1	0	1	1	1	0	0	0	5	3	0	1	1	0	1	1	4	1	1	0	1	1	4	1	1	0	1	1	1	1	6	1	0	0	0	0	3
1	1	2	1	1	0	0	1	0	0	0	0	1	0	1	0	0	0	0	1	0	3	2	0	0	1	1	1	0	3	0	1	0	0	0	1	1	1	0	0	1	1	1	5	1	0	0	0	0	2
1	4	2	2	1	1	1	1	1	1	1	1	1	1	1	1	1	1	0	0	1	7	3	0	1	1	0	1	0	3	1	1	1	1	1	5	0	0	1	0	0	1	0	2	1	1	1	0	0	7
0	1	2	0	2	1	0	0	0	0	0	0	1	1	1	1	1	1	1	1	1	9	0	0	0	1	0	0	1	2	1	0	1	1	1	4	1	1	0	0	1	1	1	5	1	1	1	0	0	6
0	2	3	1	1	1	1	0	0	1	0	1	1	0	0	1	0	1	0	0	1	4	3	0	1	1	1	1	0	4	1	1	1	1	1	5	1	1	0	0	1	1	1	5	1	1	0	0	0	1
1	3	1	2	2	1	0	1	0	0	0	1	1	1	1	1	1	1	0	1	0	7	3	0	1	1	1	1	1	5	1	1	1	1	1	5	1	1	0	1	0	1	0	4	1	0	0	0	0	2
1	2	3	2	2	1	1	1	0	0	1	0	1	1	1	1	1	1	0	1	1	8	5	1	1	1	1	1	1	6	1	1	1	1	1	5	0	1	1	1	0	1	0	4	0	1	1	0	0	2
1	4	3	1	1	0	1	0	0	0	0	1	1	1	1	1	0	0	0	0	0	4	3	0	1	1	1	1	1	5	1	0	1	1	0	3	0	1	1	0	1	1	0	4	0	1	1	0	0	5
1	2	3	2	2	1	1	1	0	0	1	0	1	1	1	1	1	1	0	1	1	8	5	1	1	1	1	1	1	6	1	1	1	1	1	5	0	1	1	1	0	1	0	4	0	1	1	0	0	2
1	0	2	2	2	1	1	1	0	0	1	0	1	1	1	1	0	0	1	1	0	6	0	1	0	0	0	0	1	2	1	1	1	1	1	5	1	1	0	0	1	1	1	5	1	0	0	0	0	6
1	0	2	1	2	1	0	0	0	0	1	0	1	1	1	1	1	0	0	0	0	5	3	0	1	1	0	1	1	4	0	1	1	1	1	4	1	1	0	0	1	1	0	4	1	0	1	0	0	2
1	0	2	1	2	1	0	0	0	0	1	0	1	1	1	1	1	0	0	0	0	5	3	0	1	1	0	1	1	4	0	1	1	1	1	4	1	1	0	0	1	1	0	4	1	0	1	0	0	2
0	5	3	1	2	0	1	0	0	0	0	1	1	0	0	1	1	0	0	0	1	4	3	0	0	1	1	1	1	4	1	1	0	1	1	4	1	1	0	0	1	1	1	5	1	0	0	0	0	1
1	6	3	1	1	0	0	0	0	0	0	1	1	1	1	1	1	0	0	0	0	5	3	0	1	1	1	1	1	5	1	1	0	1	1	4	1	1	0	0	1	1	1	5	1	0	0	0	1	1
1	3	3	1	1	0	0	0	0	0	0	1	1	1	0	1	1	1	0	1	1	7	3	0	1	1	1	1	1	5	1	0	1	1	1	4	0	1	0	1	0	1	0	3	1	1	0	0	0	1
1	4	3	2	2	1	1	1	0	0	0	1	1	1	1	1	1	1	0	1	1	8	3	0	1	1	1	1	1	5	1	1	0	1	1	4	1	0	1	1	0	1	0	4	1	1	0	0	1	2
1	0	2	1	1	0	0	1	0	1	0	1	1	1	0	1	1	0	0	0	1	5	0	0	1	1	1	1	1	5	1	0	1	1	1	4	1	1	1	0	1	1	0	5	1	1	0	0	0	1
1	0	2	2	1	1	0	0	0	0	0	0	1	0	0	1	0	1	1	0	0	4	3	0	1	1	1	1	1	5	1	0	1	1	1	4	1	1	0	0	1	1	1	5	1	0	0	0	0	0
1	3	3	1	1	1	0	1	0	0	0	0	1	1	0	1	1	1	0	0	0	5	3	0	1	1	1	1	1	5	0	1	0	1	1	3	0	1	1	1	0	1	0	4	1	1	0	0	0	1
1	5	3	2	1	0	0	0	0	0	0	1	1	1	1	1	0	0	0	1	1	6	0	0	1	1	0	1	1	4	1	1	1	1	1	5	0	1	0	0	1	1	0	3	1	1	1	0	0	4
1	0	2	1	1	0	0	0	0	0	0	1	0	0	1	0	0	0	0	0	0	1	3	0	0	1	1	1	1	4	1	0	1	1	1	4	1	1	0	0	1	1	1	5	1	1	0	0	0	2
1	2	3	1	1	0	0	0	0	1	0	1	1	1	0	1	1	0	0	1	1	6	3	0	1	1	1	1	1	5	1	1	1	1	1	5	1	1	1	1	0	1	0	5	1	1	0	0	0	2
1	3	3	1	1	1	1	1	0	1	1	1	1	1	1	1	1	1	1	1	1	9	3	0	1	1	1	1	1	5	1	1	1	1	1	5	1	1	1	1	0	0	0	4	0	1	1	0	0	2
1	3	3	1	1	1	1	1	0	1	1	1	1	1	1	1	1	1	1	1	1	9	3	0	1	1	1	1	1	5	1	1	1	1	1	5	1	1	1	1	0	0	0	4	0	1	1	0	0	2
1	6	3	1	1	1	1	0	0	0	0	1	1	0	0	1	0	1	0	1	0	4	3	0	1	1	1	1	1	5	1	0	1	1	1	4	0	1	0	1	0	1	0	3	1	0	1	0	0	2
0	1	3	1	1	1	0	0	0	0	1	0	1	1	0	0	0	1	0	0	0	3	1	1	0	0	1	1	1	4	1	1	0	1	1	4	1	1	0	0	1	1	0	4	1	0	0	0	0	1
1	6	3	1	1	1	1	1	0	1	1	1	1	1	1	1	1	1	0	1	1	8	3	1	1	1	1	1	1	6	1	1	1	1	1	5	0	1	0	1	0	1	0	3	1	1	1	0	0	1
1	3	3	1	1	1	0	0	0	0	0	0	0	0	0	0	0	0	0	0	1	1	0	0	1	0	1	1	0	3	0	0	0	1	0	1	0	1	0	1	1	1	1	5	0	0	1	0	0	2
1	2	3	1	1	1	1	1	0	1	1	1	1	1	0	1	0	0	1	1	0	5	0	0	0	0	1	1	1	3	1	1	1	1	1	5	0	1	0	1	0	1	0	3	1	1	0	0	0	2
1	2	3	2	0	1	0	0	0	0	0	0	1	1	1	1	1	1	0	0	0	6	3	0	1	1	1	1	1	5	1	1	0	1	1	4	1	1	0	0	1	1	0	4	1	1	0	0	0	1
0	1	3	2	1	0	0	0	0	0	0	1	1	1	0	1	0	1	1	0	0	5	3	0	1	1	1	1	1	5	0	1	1	1	1	4	0	1	1	1	0	1	0	4	1	0	0	0	0	2
1	3	3	2	2	1	0	0	1	1	0	1	1	1	0	1	0	0	0	1	1	5	3	0	1	1	0	1	1	4	1	0	1	1	1	4	0	1	0	1	0	0	0	2	1	0	1	0	0	1
1	3	3	2	2	1	1	1	0	0	1	1	1	1	1	1	1	1	1	1	1	9	0	1	0	0	1	1	0	3	0	0	0	1	0	1	1	1	0	0	1	1	1	5	0	0	1	0	0	5
1	0	2	2	1	0	1	1	0	1	0	1	1	1	1	0	0	0	0	0	0	3	1	0	1	1	0	0	1	3	1	0	1	1	1	4	1	0	0	0	0	0	0	1	0	1	1	0	0	1
1	3	3	1	1	0	1	1	1	1	1	1	1	1	1	1	1	1	1	1	1	9	8	0	1	1	1	1	1	5	1	1	1	1	1	5	0	0	1	1	0	0	0	2	1	1	1	1	0	2
0	1	3	2	1	1	0	0	0	0	1	0	1	1	0	1	0	0	0	0	1	4	3	0	1	1	1	1	1	5	1	1	1	1	1	5	1	1	0	0	1	1	1	5	1	0	1	0	0	1
1	3	2	0	2	0	1	0	0	1	0	1	1	0	0	1	1	0	0	1	1	5	3	0	0	1	1	1	1	4	1	0	0	1	1	3	1	1	0	0	1	0	1	4	1	0	1	0	0	1
1	5	3	1	1	1	1	0	0	0	0	1	1	1	0	1	0	0	0	0	1	4	3	0	1	1	1	1	1	5	1	1	1	1	1	5	0	1	1	1	0	1	0	4	1	0	0	0	0	1
1	4	3	1	1	1	1	1	0	0	0	0	1	1	0	1	0	1	0	1	0	5	3	0	1	1	1	1	1	5	1	0	0	1	1	3	0	1	0	1	0	0	1	3	1	0	0	0	1	1
0	1	3	1	1	1	1	1	0	0	1	0	1	1	1	1	1	1	1	1	1	9	0	0	0	1	0	0	1	2	1	1	1	1	1	5	1	1	0	0	1	1	1	5	1	1	0	0	0	1
1	4	3	1	2	1	0	1	0	1	0	0	1	1	1	1	1	1	1	1	1	9	3	0	1	1	1	0	1	4	0	1	1	1	1	4	1	1	0	1	0	1	1	5	1	1	1	0	0	6
0	5	3	2	2	1	0	1	0	0	0	0	1	1	1	1	0	0	0	0	0	4	0	0	0	1	1	1	1	4	0	1	0	1	1	3	1	1	0	0	1	1	1	5	1	1	0	0	0	2
1	0	2	2	2	1	0	0	0	1	1	1	1	1	0	1	1	1	1	1	0	7	3	0	1	1	0	0	1	3	0	1	1	1	1	4	1	1	0	0	1	1	0	4	1	1	0	0	0	1
0	2	3	1	1	1	1	1	0	1	0	1	1	1	0	1	1	0	0	1	1	6	3	0	1	1	1	1	1	5	1	1	0	1	1	4	1	1	0	0	1	1	1	5	1	0	0	0	0	1
1	4	3	1	1	0	1	1	0	1	0	1	1	1	0	0	0	1	0	1	0	4	3	0	1	1	1	1	1	5	1	1	1	1	1	5	0	0	1	1	0	1	0	3	1	1	0	0	0	2
1	4	3	1	2	0	0	0	0	0	1	0	0	0	0	0	0	0	0	0	1	1	8	0	0	1	1	1	0	3	1	0	0	0	1	2	0	1	0	0	0	1	0	2	0	0	0	0	1	2
1	2	3	1	1	1	0	0	0	0	0	0	1	1	1	1	1	0	0	0	0	5	0	0	1	1	0	1	1	4	1	0	1	1	1	4	0	0	0	0	1	1	0	2	1	1	1	0	0	1
1	3	3	1	1	1	0	0	0	0	0	0	1	1	0	1	0	0	0	0	0	3	0	0	1	1	1	1	1	5	0	1	0	0	1	2	0	1	1	0	0	1	1	4	1	0	0	0	0	1
1	2	3	2	2	1	1	0	0	1	0	1	1	1	0	1	1	1	0	1	0	6	1	0	1	1	1	1	1	5	1	0	1	1	1	4	1	1	0	0	0	1	0	3	1	0	0	0	0	3
1	0	2	2	2	0	0	0	0	0	0	1	1	1	1	1	0	0	0	1	1	6	3	1	1	1	1	1	1	6	1	1	1	1	1	5	1	1	0	0	1	1	0	4	1	0	0	0	1	7
0	4	3	1	1	1	0	1	0	0	0	1	1	1	0	1	0	0	1	1	0	5	3	0	1	1	0	0	1	3	1	1	0	1	1	4	1	1	0	1	1	1	0	5	1	1	0	0	0	2
1	5	3	1	1	1	0	0	0	0	0	1	1	1	0	1	0	1	0	0	1	5	5	0	1	1	1	1	1	5	1	0	0	1	1	3	1	1	1	1	1	1	0	6	1	1	0	0	0	2
1	4	2	1	1	1	0	1	0	0	0	0	1	1	0	1	0	1	1	0	1	6	0	0	0	1	1	1	1	4	1	0	0	1	1	3	1	1	0	0	1	1	1	5	1	0	0	0	0	2
1	3	2	1	1	1	0	0	0	0	0	0	1	0	1	1	0	0	0	0	0	3	0	1	0	1	1	1	1	5	0	0	1	1	1	3	0	0	0	0	1	1	1	3	1	0	0	0	0	4
1	2	3	2	2	1	0	0	0	0	0	0	1	0	0	0	0	0	0	0	0	1	2	0	0	0	1	1	1	3	1	0	0	0	0	1	0	1	0	0	1	1	0	3	1	0	0	0	0	0
1	2	3	2	1	1	0	0	0	0	0	0	0	0	0	1	0	0	0	0	1	2	3	0	0	0	1	1	1	3	1	0	0	1	0	2	0	1	0	0	1	1	0	3	0	0	1	0	0	4
1	2	3	2	2	1	0	0	0	0	0	0	1	0	0	0	0	0	0	0	0	1	2	0	0	0	1	1	1	3	1	0	0	0	0	1	0	1	0	0	1	1	0	3	1	0	0	0	0	0
1	2	3	2	2	1	0	0	0	0	0	0	1	0	1	1	0	0	0	0	1	4	3	1	1	1	0	0	1	4	1	1	1	1	1	5	1	1	0	0	1	1	1	5	1	1	0	0	0	3
1	1	3	1	1	1	0	0	0	1	1	1	1	0	0	1	1	1	0	1	1	6	0	0	0	1	0	1	1	3	0	1	1	1	1	4	1	1	0	0	1	1	0	4	1	0	1	0	0	1
1	2	3	2	2	1	1	1	0	0	1	0	1	1	1	1	1	1	0	1	1	8	3	1	1	1	1	1	1	6	1	1	1	1	1	5	0	1	1	0	0	1	0	3	0	1	0	0	0	2
1	4	2	1	1	1	0	0	0	0	0	0	0	0	0	1	0	0	0	0	0	1	3	0	1	0	1	1	0	3	0	1	0	0	0	1	0	1	0	0	1	1	0	3	0	0	1	0	0	0
1	2	3	1	2	0	0	1	0	1	0	1	1	0	1	1	1	1	1	1	1	8	3	0	1	1	1	1	1	5	1	1	0	1	1	4	1	1	0	0	1	1	0	4	1	1	0	0	0	1
1	4	3	0	2	1	1	1	0	0	0	0	1	1	0	1	1	1	0	1	0	6	3	0	1	1	1	1	1	5	1	1	1	1	1	5	0	0	0	0	1	1	0	2	1	0	0	0	0	2
1	2	3	1	1	0	0	0	0	1	0	1	1	1	0	1	1	1	1	1	1	8	3	0	1	1	1	1	1	5	1	0	1	1	1	4	1	1	0	0	1	1	1	5	1	0	0	0	0	2
1	3	3	1	1	1	1	0	0	0	0	0	1	1	0	1	1	1	0	1	0	6	3	0	1	1	1	1	1	5	0	1	1	1	1	4	1	1	0	0	1	1	1	5	1	1	0	0	0	2
0	3	3	1	1	0	0	1	0	1	0	1	1	1	0	1	0	1	0	1	0	5	0	0	1	1	1	1	1	5	1	0	0	1	1	3	1	1	0	1	1	1	0	5	1	0	0	0	0	2
1	1	3	1	1	1	0	0	0	0	0	0	0	0	0	1	0	0	0	0	0	1	3	0	1	0	1	1	0	3	0	1	0	0	0	1	0	1	0	0	1	1	0	3	0	0	1	0	0	0
0	2	3	2	2	0	1	0	0	0	1	1	1	0	1	1	0	0	0	0	0	3	3	0	0	0	1	1	1	3	1	0	1	1	1	4	1	1	0	0	1	1	1	5	1	1	0	0	0	4
1	3	2	0	0	1	1	1	0	1	1	1	1	1	1	1	1	1	0	1	1	8	3	0	1	1	1	1	1	5	1	1	1	1	1	5	1	1	0	0	1	1	1	5	1	0	0	0	0	3
1	2	3	1	1	0	0	0	0	1	0	1	1	1	0	1	0	1	0	1	1	6	5	0	1	1	1	1	1	5	1	1	1	1	1	5	1	1	0	0	0	1	0	3	1	1	0	0	0	1
0	2	2	1	1	0	0	0	0	1	0	1	1	0	0	1	1	1	0	1	0	5	3	0	1	1	1	1	1	5	1	1	1	1	1	5	0	1	1	1	0	1	0	4	1	1	0	0	0	1
1	2	2	1	1	0	0	0	0	1	0	0	1	1	1	1	0	0	0	1	0	5	0	0	1	1	1	1	1	5	1	0	1	1	1	4	1	1	0	0	1	1	1	5	1	1	0	0	0	3
1	1	3	2	2	1	0	0	0	0	0	0	1	0	0	0	0	0	0	0	0	1	3	0	1	0	1	1	0	3	0	0	0	1	0	1	1	1	0	0	1	1	1	5	1	0	0	0	0	6
1	2	3	1	1	0	0	0	0	1	0	0	1	1	0	0	1	1	0	1	0	5	0	1	1	0	1	1	1	5	1	0	0	1	0	2	1	1	0	0	1	1	1	5	1	0	0	0	0	4
1	3	3	2	2	0	1	1	0	0	0	1	1	1	0	1	1	0	0	0	1	5	3	0	1	1	1	1	1	5	1	1	0	1	1	4	1	1	1	0	1	1	1	6	1	1	0	0	0	1
1	1	3	1	1	1	0	0	0	0	1	0	1	0	0	1	0	0	0	1	0	3	3	0	1	1	1	1	1	5	1	1	1	1	1	5	0	0	0	0	1	1	0	2	0	0	1	0	0	0
1	4	3	2	1	1	1	0	0	0	1	1	1	1	1	1	0	0	0	1	1	6	3	0	1	1	1	1	1	5	1	1	1	1	1	5	1	1	0	0	0	1	0	3	1	1	1	0	0	1
1	3	3	2	1	1	1	1	0	0	0	0	1	1	0	1	0	0	0	0	1	4	3	0	0	1	1	1	1	4	1	1	0	1	1	4	1	1	0	0	1	1	1	5	1	0	0	0	0	3
1	2	3	2	1	1	1	1	0	0	0	0	1	1	1	1	1	1	1	1	1	9	3	0	1	1	1	1	1	5	1	1	1	1	1	5	0	0	1	0	1	1	0	3	1	0	0	0	1	2
1	2	3	1	1	1	0	1	0	0	0	1	1	0	0	1	1	0	0	0	1	4	3	0	0	1	1	1	1	4	1	1	1	1	1	5	0	1	0	1	0	1	0	3	1	0	1	0	0	3
1	1	3	0	2	1	0	0	0	0	0	1	1	1	0	1	0	1	0	1	0	5	0	0	1	1	1	1	1	5	1	0	0	1	1	3	1	1	0	1	0	1	1	5	1	0	0	0	0	6
1	0	2	2	1	0	0	1	0	1	0	1	1	1	0	1	1	1	0	0	0	5	3	0	1	1	1	1	1	5	1	0	1	1	1	4	1	1	0	0	0	1	1	4	1	1	0	0	0	2
1	2	3	1	1	1	0	1	0	1	0	1	1	1	0	1	1	1	1	1	0	7	3	0	1	1	1	1	1	5	1	1	1	1	1	5	1	1	0	0	1	1	0	4	1	0	1	0	0	1
1	3	2	0	1	0	0	0	0	0	1	1	1	1	1	1	0	0	0	0	0	4	3	0	1	0	1	1	0	3	1	0	0	1	1	3	1	1	0	0	1	1	1	5	1	0	0	0	0	3
1	2	3	1	1	0	0	0	0	0	0	1	1	0	0	0	0	0	0	0	0	1	3	0	0	1	1	1	1	4	1	1	0	1	1	4	1	0	0	0	1	1	1	4	1	1	1	0	0	7
1	2	2	2	1	1	0	0	0	0	0	0	1	1	0	1	1	1	0	1	0	6	3	0	1	1	1	1	1	5	1	1	1	1	1	5	1	1	0	1	0	1	1	5	1	1	1	0	0	2
1	2	3	2	1	0	0	1	0	1	0	1	1	1	0	1	0	0	0	1	1	5	3	0	1	0	1	1	1	4	1	1	1	1	1	5	0	0	0	0	1	1	0	2	1	0	0	0	0	1
1	2	3	2	1	0	0	0	0	1	0	1	1	1	0	1	1	0	0	1	0	5	0	0	1	1	0	1	1	4	1	0	1	1	1	4	1	1	0	1	1	1	1	6	1	1	0	0	0	4
0	2	3	2	1	1	0	0	0	1	0	1	1	1	1	1	1	1	0	1	0	7	0	1	1	1	0	0	1	4	1	1	1	1	1	5	1	0	1	0	1	1	0	4	1	0	1	0	0	6
1	3	3	1	1	0	0	0	0	1	0	1	1	1	0	1	0	1	0	1	0	5	3	0	1	1	1	1	1	5	1	1	0	1	1	4	1	1	1	1	0	1	0	5	1	0	0	0	1	1
1	2	3	1	1	0	0	0	0	1	0	0	1	1	1	1	1	1	1	1	1	9	3	1	1	1	0	1	1	5	1	1	1	1	1	5	1	1	0	0	1	1	1	5	1	1	0	0	0	6
1	5	3	0	2	1	0	0	0	0	0	0	1	1	0	1	0	1	0	1	1	6	3	1	1	1	1	1	1	6	1	1	0	1	1	4	1	1	1	0	1	0	0	4	1	1	1	0	0	1
1	3	3	1	1	0	0	1	0	1	0	1	1	1	1	1	0	1	0	0	0	5	3	1	1	1	1	1	1	6	1	1	1	1	1	5	1	1	0	0	1	1	1	5	1	1	0	0	0	2
1	1	3	1	1	1	1	0	0	0	1	0	1	1	0	1	0	0	0	0	0	3	0	0	1	1	1	1	1	5	1	0	1	0	1	3	0	0	0	0	1	1	0	2	0	1	1	0	0	5
1	3	2	2	1	1	0	0	0	0	0	0	1	0	1	1	0	1	1	1	0	6	3	1	1	1	1	1	1	6	1	1	1	1	1	5	1	1	0	0	1	1	1	5	1	0	0	0	0	3
1	3	3	2	1	1	0	1	0	1	0	1	1	1	1	1	1	0	0	1	1	7	3	0	1	1	0	1	1	4	1	1	1	1	1	5	0	1	1	1	0	1	0	4	1	0	0	0	1	1
1	2	3	2	1	1	1	0	0	0	0	0	1	1	1	1	1	0	0	1	0	6	3	0	0	1	0	1	1	3	1	1	1	1	1	5	1	0	1	1	0	1	0	4	1	1	0	0	0	1
1	6	2	1	1	1	1	1	0	1	1	1	1	1	1	1	1	1	1	1	1	9	3	0	1	1	1	0	1	4	1	1	1	1	1	5	1	1	0	0	1	1	1	5	1	0	0	0	0	7
1	2	3	1	1	0	0	0	0	0	0	1	1	1	1	1	1	1	0	1	0	7	3	1	1	1	1	1	1	6	1	1	1	1	1	5	1	1	1	1	1	1	1	7	1	1	0	0	0	1
1	2	3	2	1	1	1	1	0	1	0	1	1	1	0	1	1	1	0	1	1	7	3	1	1	1	1	1	1	6	1	1	1	1	1	5	1	1	0	0	1	1	1	5	1	0	0	0	0	2
1	5	3	1	1	0	0	1	0	1	0	0	1	1	0	1	1	1	0	1	1	7	3	0	1	1	1	1	1	5	1	1	0	1	1	4	1	1	0	1	1	1	0	5	1	1	1	0	0	1
0	2	3	2	1	0	0	0	0	0	0	1	1	1	0	1	1	1	0	1	0	6	3	0	1	1	1	1	1	5	1	1	1	1	1	5	1	1	0	0	1	1	1	5	1	0	0	0	0	3
1	2	3	0	2	0	0	0	0	0	0	1	1	1	0	1	1	1	0	1	1	7	3	1	0	0	1	1	0	3	1	0	0	1	1	3	1	0	1	0	1	1	1	5	1	0	1	0	0	1
1	3	3	1	1	1	0	1	1	1	0	1	1	1	0	1	0	0	0	0	1	4	3	1	1	1	1	1	1	6	1	1	1	1	1	5	1	1	0	0	1	1	1	5	1	0	0	0	0	2
1	2	3	2	2	1	0	0	0	0	1	1	1	1	0	1	1	0	0	0	0	4	3	0	1	1	1	1	1	5	1	1	1	1	1	5	1	1	1	1	1	1	0	6	1	0	1	0	0	2
1	1	2	1	1	1	1	1	0	1	1	0	1	1	0	1	1	1	0	1	0	6	0	1	0	1	0	1	1	4	1	0	0	0	0	1	1	1	0	0	1	1	1	5	1	0	0	0	0	4
1	2	3	1	1	0	0	1	0	1	0	1	1	1	0	1	0	0	0	0	0	3	3	0	1	1	1	1	1	5	1	0	0	1	1	3	1	1	1	0	0	1	1	5	1	1	1	0	0	1
1	2	2	2	1	0	0	0	0	1	0	0	1	0	0	1	0	1	0	1	0	4	0	0	1	1	1	1	1	5	1	0	1	0	1	3	1	1	0	0	1	1	1	5	0	0	1	0	0	4
1	4	2	2	2	1	0	1	0	0	0	0	1	0	0	1	0	0	0	1	0	3	0	0	1	0	1	1	1	4	1	0	0	1	0	2	0	1	0	0	1	1	0	3	1	0	0	0	0	1
0	1	3	1	1	0	0	0	0	1	0	0	1	1	1	1	1	1	0	1	1	8	0	1	1	1	0	1	1	5	1	1	1	1	1	5	1	1	1	1	0	1	1	6	1	1	1	0	0	2
1	2	3	2	2	1	1	1	0	0	0	0	1	1	0	1	1	0	1	1	1	7	3	0	1	1	1	1	1	5	1	1	0	1	1	4	0	0	1	1	1	1	0	4	1	0	0	0	0	2
1	2	3	1	1	0	0	0	0	1	0	1	1	1	1	1	1	1	1	1	1	9	3	0	1	1	0	1	1	4	1	1	0	1	1	4	1	1	0	0	1	1	1	5	1	1	0	0	0	1
1	2	2	2	2	1	0	1	0	0	1	0	1	0	0	1	0	0	0	1	0	3	3	0	1	1	1	1	1	5	1	0	0	1	1	3	1	1	0	0	1	1	0	4	1	1	0	0	0	2
1	2	3	1	1	0	0	1	0	0	0	0	1	1	0	1	1	0	0	0	1	5	0	0	0	1	1	1	1	4	1	1	1	1	1	5	1	1	0	0	1	1	1	5	1	0	0	0	0	1
0	1	2	1	1	0	1	1	0	0	0	1	1	1	1	1	0	0	0	0	0	4	3	1	1	1	1	1	0	5	0	1	0	0	0	1	0	1	0	0	1	0	1	3	0	0	1	0	1	0
1	1	3	2	2	1	0	0	0	0	1	1	1	1	0	1	0	1	0	1	1	6	3	1	1	1	0	1	1	5	1	1	1	1	1	5	1	1	0	0	1	1	1	5	1	0	0	0	0	4
1	3	3	2	1	1	0	1	0	1	0	1	1	1	0	1	0	0	0	1	1	5	3	0	1	1	1	1	1	5	1	1	1	1	1	5	1	1	1	0	1	1	1	6	1	1	1	0	0	4
1	3	2	1	1	0	0	0	0	1	0	1	1	1	0	1	1	1	0	0	1	6	3	0	1	1	1	1	1	5	1	1	1	1	1	5	0	1	1	0	0	0	0	2	1	1	1	0	0	2
1	1	3	1	1	1	0	0	0	0	1	1	1	0	1	1	1	0	0	1	1	6	3	0	1	1	0	0	1	3	1	1	1	1	1	5	1	1	0	0	0	1	1	4	1	1	0	0	0	1
1	2	2	0	2	1	0	0	0	1	0	1	1	1	1	1	1	1	0	1	1	8	3	0	1	1	0	1	1	4	0	1	0	1	1	3	1	1	0	0	1	1	1	5	1	0	0	0	0	2
1	2	3	0	0	1	1	0	0	0	1	1	1	1	1	1	1	0	0	0	1	6	3	1	1	1	1	1	1	6	1	1	0	1	1	4	1	1	0	0	1	1	1	5	1	0	0	0	0	4
1	1	2	2	2	0	1	1	0	1	0	1	1	0	0	1	1	1	0	1	1	6	3	1	1	1	0	1	1	5	1	1	1	1	1	5	0	1	0	0	0	1	0	2	0	0	1	0	0	4
0	1	3	1	1	0	0	0	0	0	0	1	1	1	1	1	1	0	0	0	0	5	3	1	1	1	0	0	1	4	1	1	1	1	1	5	0	0	0	1	0	1	0	2	1	0	1	0	0	1
1	2	2	2	2	1	0	0	0	1	0	1	1	1	0	1	0	1	0	1	1	6	0	0	1	1	0	1	1	4	1	1	1	1	1	5	1	1	0	0	1	1	1	5	1	1	1	0	0	1
1	3	3	2	2	1	1	0	0	0	0	0	1	1	1	1	0	0	0	0	1	5	3	0	1	1	0	1	0	3	1	1	1	1	1	5	1	1	0	0	1	1	1	5	1	0	0	0	0	3
1	3	3	1	1	0	0	0	0	1	0	0	1	1	0	1	0	1	0	1	1	6	0	1	0	1	1	1	1	5	1	0	0	1	1	3	1	1	0	0	1	1	1	5	1	1	0	0	0	1
1	4	3	1	1	0	0	1	0	0	0	1	1	1	0	1	0	0	0	1	0	4	3	0	1	1	1	1	0	4	1	0	0	1	0	2	0	1	0	1	0	1	0	3	1	1	1	0	0	6
1	2	3	1	1	1	0	1	0	0	0	0	1	1	0	1	1	0	0	1	0	5	3	0	1	0	1	1	1	4	1	0	1	1	0	3	0	1	0	1	1	1	0	4	1	0	0	0	0	1
1	4	2	2	2	1	0	1	0	1	1	0	1	0	0	1	0	0	0	0	1	3	3	0	1	1	1	1	1	5	1	1	0	1	1	4	0	1	1	1	1	1	0	5	1	0	0	0	1	2
1	4	2	2	2	1	0	1	0	1	1	0	1	0	0	1	0	0	0	0	1	3	3	0	1	1	1	1	1	5	1	1	0	1	1	4	0	1	1	1	1	1	0	5	1	0	0	0	1	2
1	1	2	1	1	1	0	0	0	1	0	1	1	1	1	1	1	0	1	1	0	7	3	0	0	1	0	0	1	2	1	1	0	1	1	4	1	1	0	0	1	1	1	5	1	0	0	0	0	4
1	1	3	1	1	1	0	0	0	1	0	1	1	1	0	1	0	0	0	0	1	4	3	0	0	0	1	1	1	3	1	0	0	0	0	1	0	1	0	0	0	1	1	3	1	0	0	0	0	1
1	2	3	2	2	0	0	1	0	0	0	0	1	1	0	1	0	0	0	0	1	4	3	0	1	1	1	1	1	5	0	1	0	1	1	3	1	0	0	1	1	1	0	4	1	1	0	0	0	2
1	2	3	1	1	1	0	0	0	0	0	0	1	1	0	1	1	1	0	1	0	6	0	0	1	1	1	1	1	5	1	1	1	1	1	5	1	0	0	0	1	1	0	3	1	1	1	0	0	3
1	3	3	1	2	0	0	0	0	0	0	1	1	1	1	1	1	1	0	0	1	7	3	0	1	1	1	1	1	5	1	1	1	1	1	5	1	1	0	0	0	1	0	3	1	0	0	0	0	4
1	3	2	2	1	1	0	0	0	0	1	0	1	1	0	1	0	0	0	1	0	4	5	1	1	0	1	0	1	4	0	1	1	1	1	4	1	0	0	0	1	1	0	3	1	1	0	0	0	1
1	2	3	1	1	1	1	0	1	0	1	0	1	1	0	1	0	1	0	1	0	5	1	0	1	1	1	1	1	5	1	1	1	1	1	5	0	1	0	1	0	1	0	3	1	0	1	0	0	4
1	2	3	0	0	1	1	1	1	1	1	1	1	1	1	1	1	0	0	1	1	7	3	1	0	0	1	1	1	4	1	0	0	1	1	3	0	0	0	0	0	1	0	1	1	0	0	0	0	2
1	0	2	1	1	1	0	1	0	1	1	1	1	1	0	1	0	1	1	0	1	6	3	0	1	1	1	1	1	5	1	1	1	1	1	5	0	0	0	0	1	0	0	1	0	0	1	0	0	1
1	3	2	2	2	0	1	1	0	1	0	0	1	1	1	1	1	1	1	1	1	9	3	0	1	1	1	1	1	5	1	1	0	1	1	4	1	1	0	0	1	1	1	5	1	0	0	0	0	4
1	2	3	1	1	1	1	1	1	1	1	1	1	0	0	0	1	1	0	1	1	5	0	0	1	1	1	1	1	5	1	0	1	1	1	4	1	1	0	0	1	1	1	5	1	1	0	0	0	3
1	2	3	1	1	1	1	0	0	1	0	1	1	1	0	1	1	0	1	1	1	7	3	0	1	1	1	1	1	5	1	1	1	1	1	5	1	1	0	0	1	1	1	5	1	0	0	0	0	4
1	2	3	2	1	1	0	0	0	1	0	1	1	1	0	1	1	1	0	1	0	6	3	0	1	1	1	1	1	5	1	1	0	1	1	4	1	1	0	0	1	1	1	5	1	1	1	0	0	1
1	2	3	1	1	1	1	1	1	1	1	1	1	1	1	1	1	1	1	1	1	9	3	1	1	1	1	1	1	6	1	1	1	1	1	5	1	1	0	0	1	1	1	5	1	0	0	0	0	2
1	2	1	2	2	1	1	1	0	0	0	0	1	0	0	1	0	1	0	1	1	5	3	0	1	1	1	1	1	5	1	1	0	1	1	4	1	1	0	0	1	1	1	5	1	0	0	0	0	3
1	2	3	2	2	0	1	1	0	0	0	1	1	1	1	1	1	1	1	0	1	8	0	0	1	1	1	1	1	5	1	1	1	1	1	5	0	0	0	0	1	1	0	2	0	0	1	0	0	2
1	3	1	2	1	0	0	1	0	0	0	0	1	1	0	1	1	1	0	1	0	6	0	1	1	1	1	1	1	6	1	1	1	1	1	5	0	0	0	1	1	1	0	3	1	0	0	0	0	1
1	3	3	1	1	1	0	0	0	0	1	1	1	1	0	1	1	1	0	0	1	6	3	0	1	1	1	1	1	5	1	1	1	1	1	5	1	1	0	1	1	1	1	6	1	0	1	0	0	1
1	2	3	1	1	1	0	1	0	1	0	1	1	1	1	1	0	1	0	1	0	6	2	0	1	1	1	1	1	5	0	1	0	1	1	3	1	0	0	0	1	1	1	4	1	0	1	0	0	1
1	4	3	2	1	0	0	1	1	1	0	1	1	0	0	1	1	0	0	1	0	4	3	1	1	1	1	1	1	6	1	0	0	1	1	3	1	1	0	0	1	1	1	5	1	0	1	0	0	2
1	3	2	0	2	1	0	0	0	0	0	0	1	0	0	1	0	0	0	0	0	2	3	0	1	1	1	0	1	4	1	1	1	1	1	5	1	1	1	0	1	1	1	6	1	0	0	0	0	5
1	3	2	2	1	0	0	1	0	1	0	0	1	1	0	1	1	0	1	0	1	6	3	0	1	1	1	1	1	5	1	1	0	1	1	4	0	1	0	0	0	1	0	2	0	0	1	0	0	1
1	3	2	2	2	1	0	0	0	0	0	0	1	1	0	0	1	0	0	1	1	5	3	0	1	0	1	1	1	4	1	0	0	1	1	3	0	1	1	1	1	1	0	5	1	0	1	0	0	1
0	2	1	1	1	1	0	0	0	1	0	1	1	1	1	1	0	0	0	0	0	4	0	1	1	1	0	0	1	4	1	1	1	1	1	5	1	0	0	0	1	1	0	3	1	0	1	0	0	4
1	2	2	2	1	1	1	0	0	0	0	0	1	1	0	1	0	0	0	1	0	4	1	0	1	1	1	1	1	5	1	1	1	1	1	5	1	1	0	0	1	1	1	5	1	1	1	0	0	1
1	3	3	1	1	0	1	1	1	1	0	1	1	1	1	1	1	1	0	0	1	7	3	0	1	1	1	1	1	5	1	1	0	1	1	4	1	1	0	1	1	1	1	6	1	1	0	1	0	2
1	2	3	2	1	1	0	1	0	0	1	0	1	1	0	1	0	1	1	1	1	7	0	0	1	1	0	1	1	4	1	0	1	1	1	4	1	1	0	1	1	1	1	6	1	0	1	0	0	5
1	2	3	2	1	1	0	0	0	1	0	1	1	1	0	1	1	0	0	1	1	6	4	0	1	1	1	1	1	5	1	0	1	1	1	4	0	1	1	1	1	1	0	5	0	0	0	0	1	1
1	2	3	2	1	1	1	1	0	0	0	0	1	1	1	1	0	0	0	1	0	5	0	0	0	1	1	1	1	4	1	1	1	1	0	4	1	1	0	0	1	1	0	4	1	0	1	0	0	0
1	1	3	2	1	1	0	0	0	0	0	0	1	1	0	1	0	1	0	1	0	5	0	0	1	1	1	1	1	5	1	1	1	1	1	5	1	1	0	0	1	1	1	5	1	0	0	0	1	4
0	2	3	1	1	1	0	0	0	0	0	0	0	0	0	1	0	0	0	0	0	1	3	0	0	1	1	1	1	4	0	1	0	1	0	2	1	0	0	0	1	1	0	3	1	1	1	0	0	1
1	2	3	2	1	1	0	1	0	0	0	0	1	1	1	1	1	1	0	0	0	6	3	0	1	1	1	1	1	5	1	1	1	1	1	5	1	1	0	0	1	1	1	5	1	0	0	0	0	2
1	2	3	1	1	0	0	0	1	1	0	1	1	1	0	1	1	0	0	0	0	4	3	0	1	1	1	1	1	5	1	1	1	1	1	5	0	1	1	0	0	1	1	4	1	0	0	0	0	1
1	2	3	2	1	1	0	0	0	1	0	0	1	1	0	1	1	1	0	1	0	6	3	1	1	1	0	1	1	5	1	1	0	1	1	4	1	1	1	1	1	1	1	7	1	0	0	0	0	2
1	2	2	1	1	1	0	1	0	0	0	1	1	0	1	1	0	0	0	1	0	4	0	1	0	1	1	1	1	5	1	0	0	1	1	3	0	0	0	1	1	1	1	4	1	0	0	0	0	5
1	3	2	0	2	1	1	1	0	0	1	0	1	0	0	1	1	0	1	0	0	4	0	0	0	1	1	1	1	4	1	1	1	1	1	5	1	0	0	0	1	1	1	4	1	0	0	0	0	1
1	2	3	2	2	1	0	1	0	0	1	1	1	1	0	1	1	1	0	0	0	5	0	0	1	1	0	1	1	4	1	1	1	1	1	5	0	0	1	0	1	1	0	3	1	1	1	0	0	3
1	2	3	1	2	1	1	1	0	0	0	1	1	1	1	1	1	1	0	1	1	8	3	0	1	1	1	1	1	5	1	0	0	1	1	3	1	0	0	1	0	1	1	4	1	0	0	0	0	6
0	0	2	2	1	1	1	0	0	0	0	0	1	0	1	1	0	1	0	0	0	4	0	0	1	0	1	1	1	4	1	1	1	1	1	5	1	1	0	0	1	1	1	5	1	0	0	0	0	5
1	1	3	2	0	1	0	0	0	0	0	0	1	1	0	1	1	1	0	0	0	5	0	0	0	0	1	1	1	3	1	0	0	1	1	3	1	1	0	0	1	1	0	4	1	0	1	0	0	1
1	3	2	2	2	0	0	1	0	1	0	0	1	1	1	1	0	1	0	1	1	7	3	0	1	1	1	1	1	5	1	0	0	1	1	3	1	1	0	0	0	1	0	3	1	0	0	0	0	6
1	3	3	2	2	1	0	0	0	0	0	0	1	0	0	0	0	0	0	0	0	1	2	0	1	0	1	1	0	3	0	1	1	1	0	3	0	1	0	0	1	1	0	3	1	0	1	0	0	7
1	3	3	1	1	1	0	1	1	1	0	0	1	1	0	1	1	1	0	1	1	7	8	0	1	1	1	1	1	5	1	0	1	1	1	4	0	0	1	1	1	1	0	4	1	1	0	0	0	6
1	3	1	2	2	1	1	1	0	0	1	0	1	1	0	1	1	1	0	0	1	6	3	0	0	1	1	1	1	4	1	1	0	1	1	4	0	1	0	0	0	1	0	2	0	0	1	0	0	7
1	1	3	2	1	1	0	0	0	0	0	1	1	1	1	1	1	1	1	0	1	8	3	0	1	1	0	0	1	3	1	1	1	1	1	5	0	1	1	1	0	1	0	4	0	0	1	0	0	2
1	2	2	1	1	0	0	1	0	1	0	1	1	1	0	1	1	0	0	0	1	5	3	0	1	0	0	1	1	3	1	1	1	1	1	5	1	1	1	1	0	1	0	5	1	0	0	0	0	0
1	3	3	2	1	1	0	0	0	1	1	1	1	1	0	1	0	0	0	1	0	4	0	0	1	0	1	1	1	4	1	0	1	0	1	3	0	1	1	1	1	1	0	5	1	1	0	0	0	3
1	3	3	2	2	1	1	1	0	0	0	1	1	1	0	1	1	0	0	0	0	4	3	0	1	1	1	1	1	5	1	0	0	1	1	3	1	1	0	0	1	1	1	5	1	0	0	0	0	2
1	2	3	1	1	1	0	0	0	0	0	0	1	1	0	1	1	1	0	1	1	7	3	0	1	1	1	1	1	5	1	0	1	1	0	3	0	1	0	0	0	1	0	2	1	0	0	0	0	1
1	2	3	1	1	1	0	0	0	0	0	1	1	1	1	1	1	1	0	1	0	7	0	0	0	1	1	1	1	4	0	1	1	1	1	4	0	0	1	0	0	1	0	2	1	0	1	0	0	6
1	3	3	1	1	1	1	1	0	1	0	1	1	1	1	1	1	0	0	0	0	5	0	0	1	1	1	1	0	4	1	1	1	1	1	5	1	1	0	0	1	1	1	5	1	0	1	0	0	1
0	3	3	1	1	0	0	1	0	1	0	0	1	1	1	1	0	1	0	0	0	5	3	0	1	0	1	1	1	4	1	1	0	0	0	2	1	1	0	0	0	1	0	3	1	0	0	0	0	1
1	2	3	2	1	1	0	0	0	0	0	0	0	0	0	1	0	0	0	0	0	1	4	0	0	1	1	1	1	4	1	1	1	1	1	5	0	0	1	0	1	1	1	4	1	1	1	1	1	3
1	2	1	2	2	1	0	1	0	0	1	0	1	1	0	1	1	1	0	0	0	5	3	0	1	1	1	1	1	5	1	1	0	1	1	4	1	1	0	0	1	1	1	5	1	0	0	0	0	0
0	4	3	1	1	1	1	1	0	0	1	1	1	1	0	1	1	1	0	1	0	6	8	0	1	1	1	1	1	5	1	1	1	1	1	5	1	1	0	0	1	1	1	5	1	1	1	0	0	7
1	3	3	2	2	1	0	1	0	1	0	1	1	1	0	1	1	0	0	1	1	6	0	0	1	1	1	1	1	5	1	0	0	1	1	3	0	1	1	1	0	1	0	4	1	0	0	0	0	2
1	3	3	1	1	0	1	1	0	1	0	1	1	1	0	1	1	1	0	0	1	6	3	0	1	1	1	1	1	5	1	0	0	1	1	3	1	1	0	0	1	1	1	5	1	0	0	0	0	1
1	1	2	1	2	1	1	0	0	0	0	0	1	0	0	1	0	0	0	1	0	3	3	0	1	1	1	1	1	5	1	1	1	1	1	5	1	1	0	0	1	1	1	5	1	0	1	0	0	3
1	2	3	1	1	1	0	0	0	0	0	1	1	1	1	1	1	1	0	0	0	6	3	1	1	1	0	0	1	4	1	0	0	1	1	3	0	1	0	1	0	1	0	3	1	1	1	0	0	2
1	3	2	1	1	0	1	1	0	0	0	1	1	1	1	1	1	1	1	1	1	9	0	0	1	1	0	0	1	3	1	1	1	1	1	5	0	1	1	0	0	1	0	3	1	1	1	0	0	2
1	2	1	2	0	1	0	0	0	0	1	0	0	1	0	1	0	0	0	0	0	2	0	1	0	1	1	1	0	4	0	0	0	1	1	2	1	1	0	0	1	1	0	4	1	0	0	0	0	5
1	2	3	2	1	0	0	0	1	1	0	1	1	1	0	1	0	0	0	0	1	4	0	1	1	1	0	1	1	5	1	1	1	1	1	5	1	1	0	0	1	1	1	5	1	1	0	0	0	2
1	3	3	2	1	1	1	1	0	1	0	1	1	1	1	1	0	1	0	1	0	6	0	1	1	1	1	1	1	6	1	0	0	1	1	3	1	1	0	1	1	1	1	6	1	0	1	0	0	1
0	2	2	2	2	1	0	0	0	0	0	0	1	1	1	1	1	1	1	1	1	9	0	1	1	1	0	1	1	5	0	1	1	1	1	4	0	1	0	0	1	1	0	3	1	0	0	0	0	3
0	3	3	2	2	1	1	0	0	0	1	0	1	1	1	1	0	1	0	0	0	5	3	1	1	1	1	1	0	5	1	1	1	1	1	5	1	1	0	0	0	1	1	4	1	1	0	0	0	2
1	3	3	1	2	0	0	0	0	1	0	1	1	0	0	1	0	1	0	0	0	3	3	0	1	1	0	1	1	4	1	1	0	1	1	4	0	1	0	1	0	1	0	3	1	1	0	0	0	1
1	5	2	1	1	1	1	1	0	0	0	0	1	1	1	1	1	1	1	1	1	9	5	0	1	1	0	1	1	4	1	1	1	1	1	5	1	1	1	1	0	1	0	5	1	1	1	0	0	4
0	2	3	1	1	0	0	0	0	0	0	1	1	1	0	1	1	1	0	1	0	6	3	0	0	1	1	1	1	4	1	1	0	1	1	4	1	1	0	0	1	1	1	5	1	0	1	0	0	2
1	2	3	1	1	1	0	0	0	0	0	1	1	1	0	1	1	1	0	1	1	7	0	0	1	1	1	1	1	5	1	0	1	1	1	4	1	1	0	0	1	1	1	5	1	0	0	0	0	2
1	2	3	1	1	0	0	0	0	1	0	1	1	1	0	1	1	1	1	1	1	8	3	0	1	1	0	1	1	4	1	0	0	1	1	3	0	1	1	1	0	1	1	5	1	1	0	0	0	1
1	0	1	0	1	0	0	1	0	1	0	0	1	1	1	1	0	0	0	0	1	5	3	0	0	1	1	1	1	4	1	1	0	1	1	4	1	1	0	0	1	1	1	5	1	0	0	0	0	1
1	3	1	2	1	0	0	1	0	0	0	0	1	1	0	1	1	0	1	0	1	6	0	0	0	1	1	1	1	4	1	1	1	1	1	5	0	1	0	1	1	1	0	4	1	0	1	0	0	5
1	1	3	1	1	0	0	0	0	1	0	1	1	0	1	0	0	1	0	1	1	5	0	0	0	1	1	1	1	4	0	1	1	1	0	3	1	1	0	0	1	1	1	5	1	0	0	0	0	5
1	1	2	2	0	1	1	1	0	0	0	0	1	0	0	0	0	0	0	0	0	1	0	0	1	0	1	1	0	3	1	1	0	0	0	2	1	1	0	0	1	1	1	5	0	0	1	0	0	2
1	3	3	1	2	1	0	0	0	0	0	0	1	1	0	1	1	0	0	1	1	6	0	0	0	0	1	1	1	3	1	0	0	1	1	3	1	1	0	0	1	1	1	5	1	0	0	0	0	3
1	3	3	1	1	1	1	1	0	1	0	1	1	1	1	1	1	0	1	0	0	6	3	1	1	1	0	1	1	5	1	1	1	1	1	5	1	1	1	1	0	1	0	5	1	1	0	0	0	1
1	3	3	1	1	0	1	1	1	1	0	1	1	1	1	1	1	1	1	1	1	9	3	0	1	1	1	0	1	4	1	1	1	1	1	5	1	1	0	0	1	1	1	5	1	1	1	0	0	4
1	3	2	0	2	1	0	1	0	1	0	0	1	1	1	1	1	1	1	1	1	9	3	0	0	1	1	1	1	4	1	1	1	1	1	5	1	1	0	0	1	1	1	5	1	0	0	0	0	0
0	2	3	1	1	0	0	1	0	0	0	1	1	1	0	1	0	0	0	0	0	3	3	0	1	1	1	1	1	5	1	1	1	1	1	5	1	1	0	0	1	1	1	5	1	1	0	0	0	1
1	3	2	2	2	0	0	0	0	1	0	1	1	0	0	1	1	1	0	1	0	5	3	0	0	0	1	1	1	3	1	0	0	1	1	3	1	1	0	0	1	1	0	4	1	1	0	0	0	2
1	3	2	2	1	0	1	1	0	1	1	0	1	1	1	1	1	1	1	1	1	9	3	0	1	1	1	1	1	5	1	1	1	1	1	5	1	1	0	0	0	1	0	3	1	1	1	0	0	7
1	2	3	1	1	1	1	1	0	1	0	1	1	1	0	1	1	1	1	1	0	7	3	0	1	0	1	1	0	3	1	0	0	1	1	3	0	1	1	1	1	1	0	5	1	1	0	0	0	1
1	0	2	0	1	1	1	1	0	1	1	1	1	0	0	0	1	1	0	1	1	5	1	0	1	1	1	0	1	4	1	1	1	1	1	5	1	0	0	0	1	1	0	3	1	1	1	0	0	4
0	2	3	2	2	0	0	0	0	0	0	1	1	0	1	1	0	1	0	0	0	4	3	1	0	0	1	1	0	3	1	1	1	1	1	5	0	0	0	0	1	1	0	2	1	1	0	0	0	1
1	2	3	2	1	0	0	0	0	1	0	1	1	1	0	1	1	1	0	1	0	6	3	0	1	1	1	1	1	5	1	1	1	1	1	5	0	1	0	0	0	1	0	2	1	0	1	0	0	2
1	4	3	2	1	0	1	1	0	1	0	1	1	1	0	1	0	1	0	1	0	5	3	0	0	1	1	1	1	4	1	0	0	1	1	3	1	1	0	0	0	1	0	3	1	0	0	0	0	1
1	3	3	1	1	1	0	0	0	1	1	0	1	0	0	1	0	1	0	1	1	5	3	0	0	1	1	1	1	4	1	0	1	1	1	4	1	1	0	0	1	1	1	5	1	0	1	0	0	3
1	4	3	2	1	0	1	0	0	0	0	1	0	1	0	0	0	0	0	0	1	2	5	1	1	1	1	1	1	6	1	0	0	1	1	3	0	1	0	0	0	0	0	1	1	0	0	0	0	0
0	0	1	0	2	0	0	0	0	0	1	1	1	1	1	1	1	1	0	1	0	7	3	0	0	1	1	1	1	4	1	0	0	1	1	3	1	1	0	0	1	1	1	5	0	1	1	0	0	2
1	2	2	2	1	0	1	0	0	1	0	1	1	1	0	1	1	1	0	0	1	6	3	0	1	1	1	1	1	5	1	1	0	1	1	4	1	1	0	0	1	1	1	5	1	1	0	0	0	0
1	4	2	1	1	1	0	0	0	1	1	0	1	1	1	1	1	1	0	1	1	8	0	0	1	1	1	1	1	5	1	1	1	1	1	5	0	1	0	1	0	1	0	3	1	0	0	0	0	0
1	4	3	2	1	1	1	0	0	0	0	0	1	0	0	1	1	1	0	1	0	5	0	0	1	0	1	1	1	4	1	1	0	1	1	4	1	1	1	1	0	1	1	6	1	1	0	0	0	3
0	1	3	2	0	1	0	0	0	0	0	1	1	1	0	1	1	1	0	1	0	6	0	0	1	1	1	1	1	5	0	1	1	1	1	4	1	1	0	0	1	1	1	5	1	0	0	0	0	1
0	4	1	0	0	0	1	0	0	0	0	0	0	0	0	0	0	0	0	0	1	1	8	1	1	0	1	1	1	5	1	0	1	1	1	4	1	1	1	0	1	1	1	6	1	0	0	0	0	0
1	2	3	1	1	1	1	1	0	1	1	1	1	1	0	1	1	1	0	1	0	6	3	1	1	1	0	0	1	4	1	1	1	1	1	5	0	1	1	1	0	0	0	3	1	1	1	1	0	3
1	4	3	2	1	1	1	0	0	0	0	0	1	0	1	0	1	0	0	1	0	4	2	0	1	1	1	1	0	4	1	1	1	1	1	5	1	1	0	0	1	1	1	5	1	0	1	0	0	3
1	5	3	1	1	0	0	0	0	0	1	0	1	1	1	1	0	0	1	0	1	6	3	0	0	1	1	1	1	4	1	1	0	1	1	4	1	1	0	0	1	1	1	5	1	1	0	0	0	2
1	2	3	2	1	0	0	0	1	1	0	1	1	1	0	1	1	1	1	1	0	7	3	0	1	1	0	0	1	3	1	1	1	1	1	5	1	1	0	1	1	1	0	5	1	0	1	0	0	2
1	3	3	1	1	1	1	1	0	0	0	0	1	0	0	1	1	0	0	1	1	5	3	1	1	1	1	1	1	6	1	1	0	1	0	3	1	1	0	0	1	1	1	5	1	1	0	0	0	1
1	2	3	2	1	0	1	1	1	1	0	0	1	1	0	1	1	1	0	1	1	7	3	0	1	1	1	1	1	5	1	1	1	1	1	5	1	0	0	0	0	1	0	2	1	0	1	0	0	5
0	2	2	1	1	0	0	0	0	1	0	1	1	0	0	1	1	1	1	0	1	6	3	0	0	0	1	1	1	3	1	1	0	1	1	4	1	1	0	0	1	1	1	5	1	0	0	0	0	1
0	2	3	2	1	0	0	0	0	1	0	0	1	1	0	1	1	0	0	1	0	5	0	0	0	0	1	1	1	3	0	1	1	1	0	3	0	1	0	0	1	1	0	3	0	1	1	0	0	0
1	2	3	1	1	0	1	0	0	0	1	0	1	0	1	1	0	1	0	0	1	5	5	0	0	0	1	1	1	3	1	1	1	1	1	5	1	1	0	0	1	1	1	5	1	0	1	0	0	2
0	2	2	2	2	0	1	1	0	1	0	0	1	1	1	1	1	1	0	1	0	7	3	0	0	0	1	1	1	3	1	1	0	1	1	4	1	1	0	0	1	1	0	4	1	0	0	0	0	1
1	2	2	2	1	1	1	1	0	1	0	0	1	1	1	1	1	1	0	1	1	8	3	0	1	1	1	1	1	5	1	1	1	1	1	5	1	1	0	0	1	1	1	5	1	0	1	0	0	3
1	5	3	1	1	1	1	0	0	0	0	0	1	0	0	1	1	0	1	1	1	6	0	0	1	1	1	1	1	5	1	1	1	1	1	5	0	1	1	0	0	1	0	3	1	0	0	0	0	1
1	2	3	2	0	0	1	0	0	0	1	0	0	0	0	0	1	0	0	0	1	2	3	0	1	1	1	1	0	4	0	1	0	0	0	1	1	1	0	0	1	1	0	4	1	0	0	0	0	1
0	5	3	2	2	0	1	1	0	0	0	0	1	1	0	0	0	0	1	1	0	4	6	0	1	0	1	1	1	4	1	0	0	1	1	3	1	1	0	0	1	1	1	5	1	1	0	0	0	1
0	1	2	1	1	0	1	1	1	1	0	1	1	1	1	1	0	0	0	0	0	4	3	0	1	1	0	1	1	4	1	1	0	1	1	4	1	1	0	0	1	1	1	5	1	0	0	0	0	1
1	4	2	1	1	1	1	1	0	0	0	1	1	1	1	1	1	1	0	1	0	7	1	1	1	1	0	1	1	5	1	1	1	1	1	5	1	1	0	1	0	1	0	4	1	1	0	0	0	2
0	1	3	1	1	1	0	0	0	1	0	0	1	1	1	1	1	0	0	0	0	5	0	0	1	1	0	1	1	4	1	1	1	1	1	5	1	1	0	0	1	1	1	5	1	1	0	0	0	0
1	2	3	1	1	1	1	1	0	1	1	1	1	1	0	1	1	0	0	1	0	5	0	0	1	1	1	0	1	4	1	1	1	1	1	5	1	1	1	1	1	1	0	6	1	0	1	0	0	1
1	4	2	0	2	1	0	0	0	0	0	0	1	1	1	1	0	1	0	1	1	7	3	0	0	1	1	1	0	3	0	1	0	0	0	1	0	1	0	1	1	1	1	5	1	0	0	0	0	6
0	5	2	1	1	0	0	1	0	0	1	1	1	1	0	1	0	1	0	0	0	4	5	0	0	1	1	1	1	4	1	0	1	0	0	2	1	1	0	1	1	1	1	6	1	1	0	0	0	0
0	3	2	1	1	0	0	1	0	0	0	0	1	0	0	0	0	0	0	0	0	1	2	0	0	1	0	1	1	3	1	1	1	1	0	4	1	1	0	0	1	1	0	4	1	0	1	0	0	2
0	2	2	1	1	1	0	0	0	0	0	0	1	1	0	1	1	1	0	1	0	6	3	0	1	1	0	1	1	4	1	1	1	1	1	5	1	1	0	0	1	1	1	5	0	1	1	0	0	6
1	1	2	1	1	0	0	1	0	1	0	1	1	0	1	1	0	1	0	0	1	5	0	0	1	1	1	0	1	4	1	0	0	1	1	3	1	1	0	0	1	1	1	5	1	1	1	0	0	1
1	3	3	1	1	1	0	1	0	1	1	1	1	1	0	1	0	0	0	1	1	5	3	0	1	1	1	0	1	4	1	1	1	1	1	5	1	1	0	0	0	1	0	3	1	0	1	0	0	2
1	4	2	2	1	1	0	0	0	0	0	0	1	1	1	1	0	0	0	0	1	5	3	0	0	1	1	1	1	4	1	0	0	1	1	3	0	1	0	0	1	0	0	2	0	0	1	0	0	4
1	1	3	0	0	0	0	1	0	0	0	0	1	1	1	1	1	1	0	1	1	8	3	0	1	1	1	1	1	5	1	1	0	1	1	4	1	1	0	0	1	1	1	5	1	1	1	1	0	1
0	3	3	1	1	0	0	0	0	0	0	1	0	0	0	1	0	0	0	0	0	1	3	0	1	0	1	1	1	4	1	1	1	1	1	5	0	1	0	0	1	1	0	3	1	0	0	0	0	1
1	2	3	1	1	1	0	0	0	0	0	0	1	1	0	1	1	1	0	1	0	6	3	0	1	1	1	1	1	5	1	1	0	0	1	3	0	1	0	1	0	1	0	3	1	1	1	0	0	3
1	2	3	1	1	1	1	1	0	1	1	1	1	1	1	1	1	1	1	1	1	9	0	0	1	1	1	1	1	5	1	1	1	1	1	5	1	0	0	0	0	1	0	2	0	0	1	0	0	3
1	2	3	1	1	1	1	1	0	1	1	1	1	1	1	1	1	1	1	1	1	9	0	0	1	1	1	1	1	5	1	1	1	1	1	5	1	0	0	0	0	1	0	2	0	0	1	0	0	3
1	1	3	1	1	0	0	0	0	1	0	1	1	1	0	1	0	1	0	0	0	4	0	0	1	1	1	1	1	5	1	0	0	1	1	3	1	1	0	0	1	1	1	5	1	0	1	0	0	1
1	3	3	1	1	0	0	1	0	0	0	0	1	0	1	1	0	1	0	1	1	6	3	1	1	0	1	1	1	5	1	1	1	1	1	5	1	1	0	0	1	1	0	4	1	1	0	0	0	3
1	3	2	1	1	0	0	0	0	0	0	1	1	1	1	1	0	0	0	0	0	4	0	0	1	1	1	1	1	5	0	1	0	1	1	3	0	1	0	1	0	1	0	3	1	1	0	0	0	5
1	2	3	2	1	1	0	0	0	0	1	0	1	1	0	1	1	1	1	1	1	8	0	0	1	1	1	1	1	5	1	1	1	1	1	5	0	0	1	0	0	1	1	3	1	1	1	0	0	1
1	1	1	2	2	1	1	1	0	1	0	0	0	1	1	1	1	1	0	0	0	5	3	1	1	1	1	1	1	6	1	0	1	1	1	4	1	1	0	0	1	1	1	5	1	0	0	0	0	3
0	6	3	2	0	1	1	1	0	0	0	1	1	1	1	1	1	1	0	0	1	7	3	0	1	1	1	1	1	5	1	1	1	1	1	5	1	1	0	0	0	0	1	3	1	1	0	0	0	2
1	2	3	2	1	1	0	0	0	1	0	1	1	1	0	1	0	0	0	0	0	3	3	0	1	1	1	1	1	5	1	1	0	1	1	4	1	1	0	0	1	1	1	5	1	1	0	0	0	1
1	1	3	2	2	1	1	0	0	0	1	0	1	1	1	1	1	1	0	1	1	8	0	0	0	0	1	1	1	3	0	1	1	1	1	4	0	0	0	1	0	1	0	2	1	0	0	0	0	4
1	3	3	1	2	0	1	0	0	1	0	1	1	1	1	1	1	1	0	1	1	8	3	0	1	1	0	1	1	4	1	0	1	1	1	4	1	1	0	1	1	1	0	5	1	0	0	0	0	5
1	2	3	2	1	0	0	0	0	1	0	0	0	0	0	1	0	0	0	0	0	1	3	0	0	0	1	1	1	3	0	0	0	1	0	1	1	1	0	0	1	1	1	5	1	0	0	0	0	1
0	2	3	0	0	1	0	0	0	0	0	0	1	1	0	1	1	1	0	0	0	5	3	0	1	1	1	1	1	5	0	1	0	1	1	3	1	1	0	0	1	1	0	4	1	1	0	0	0	1
1	2	3	1	1	1	1	0	0	1	0	0	1	1	0	1	1	0	0	1	0	5	3	1	1	1	0	1	1	5	1	0	1	1	1	4	1	1	0	0	1	1	1	5	0	1	1	0	0	1
1	5	3	1	1	1	0	1	0	0	0	1	1	1	0	0	0	0	0	1	1	4	3	0	0	1	1	1	1	4	1	0	0	1	1	3	1	1	0	0	1	0	0	3	1	1	1	0	0	2
1	4	2	1	0	1	0	0	0	0	0	0	1	1	0	0	1	0	0	0	0	3	3	1	0	0	1	1	1	4	1	0	1	1	0	3	1	1	0	0	1	1	1	5	1	0	0	0	0	5
1	1	3	2	1	1	0	0	0	1	0	1	1	0	0	1	1	0	0	1	1	5	0	0	0	1	0	1	1	3	1	1	1	1	1	5	0	1	0	0	0	1	0	2	1	0	0	0	0	2
1	3	3	2	0	1	1	0	0	0	0	0	1	0	0	1	0	0	0	1	0	3	3	0	0	1	1	1	1	4	1	1	1	1	1	5	0	1	0	1	1	1	1	5	0	0	1	0	0	0
1	2	2	2	2	1	1	1	0	0	1	0	1	1	1	1	1	1	1	1	1	9	3	1	0	1	1	1	1	5	1	1	1	1	1	5	1	1	0	0	1	1	1	5	1	1	0	0	0	5
1	3	2	1	1	0	0	1	1	0	0	1	1	1	1	1	1	1	1	1	1	9	0	0	1	1	1	1	1	5	1	0	1	1	1	4	1	1	0	0	1	1	1	5	1	1	1	0	0	3
0	5	3	1	0	1	0	0	0	0	1	0	1	0	1	1	0	0	0	0	0	3	0	1	1	1	1	1	1	6	0	0	0	1	0	1	1	1	0	0	1	1	1	5	1	1	0	0	0	1
1	2	3	1	1	1	1	1	0	1	1	1	1	1	1	1	1	1	0	0	1	7	5	1	1	1	1	1	1	6	1	1	1	1	1	5	1	1	0	0	1	1	1	5	1	1	1	0	0	2
1	4	2	1	1	1	1	1	0	1	1	0	1	1	0	1	0	1	0	0	1	5	3	0	1	1	1	1	1	5	1	1	1	1	1	5	0	1	0	1	1	1	1	5	1	0	1	0	0	2
1	1	2	1	0	1	0	0	0	0	0	0	1	1	0	0	0	1	0	0	0	3	0	0	0	1	1	1	0	3	1	1	1	1	1	5	0	1	0	1	1	1	1	5	0	0	0	0	1	1
1	2	3	1	1	1	1	0	0	0	0	1	1	1	0	1	1	1	1	1	0	7	3	0	1	1	0	1	1	4	1	1	1	1	1	5	0	1	0	1	0	1	0	3	1	1	0	0	0	2
1	3	3	2	1	1	1	0	0	1	0	0	1	0	0	1	0	0	0	1	0	3	3	0	1	1	1	1	1	5	1	0	0	1	1	3	0	1	1	1	0	1	0	4	0	0	0	0	1	2
0	3	3	1	1	1	0	0	0	0	1	0	1	1	1	1	0	1	1	0	0	6	3	0	1	1	1	1	1	5	1	1	1	1	1	5	1	1	0	0	1	1	1	5	1	1	0	0	0	1
1	3	3	2	2	1	0	0	0	0	0	0	1	0	0	1	0	0	0	0	0	2	3	0	1	1	1	1	1	5	1	0	0	1	1	3	1	1	0	0	1	1	1	5	1	0	0	0	0	6
1	3	3	2	1	1	0	1	0	1	0	1	1	1	0	1	1	0	0	0	1	5	3	0	1	1	1	1	1	5	1	0	0	1	1	3	0	1	0	1	1	1	0	4	1	1	0	0	0	2
1	3	3	2	0	0	0	1	0	0	0	0	0	0	0	1	0	0	0	0	0	1	5	0	0	1	1	1	0	3	0	0	0	1	0	1	1	1	0	0	1	1	1	5	0	0	0	0	1	1
1	3	3	1	2	1	0	0	0	1	0	1	1	1	0	1	1	1	0	1	1	7	8	1	1	1	1	0	1	5	0	1	1	1	1	4	1	1	0	0	1	1	1	5	1	1	0	0	0	3
1	2	3	0	0	0	1	0	0	0	0	0	1	0	0	0	0	0	0	0	0	1	0	0	0	0	1	1	1	3	0	1	0	0	0	1	0	0	0	0	1	1	1	3	1	0	0	0	0	3
0	4	1	0	0	0	1	1	0	0	0	0	0	1	0	0	0	0	0	0	0	1	1	0	0	1	1	1	0	3	0	0	1	0	0	1	0	1	1	0	1	1	1	5	0	0	1	0	0	2
1	3	3	2	2	1	1	0	0	0	0	0	0	0	0	1	1	0	0	0	1	3	3	0	0	1	1	1	1	4	1	0	0	1	1	3	0	1	0	1	0	1	0	3	0	0	0	0	1	1
0	4	2	1	1	0	1	1	0	1	0	1	1	1	0	1	1	1	0	1	0	6	0	0	1	1	0	1	1	4	1	1	0	1	1	4	1	1	0	0	1	1	1	5	1	0	0	0	0	1
1	2	0	0	0	0	0	0	1	0	0	0	0	0	1	0	0	0	0	0	0	1	1	0	0	1	1	1	0	3	0	0	1	0	0	1	0	1	0	1	1	1	1	5	0	0	1	0	0	2
1	2	3	2	1	1	1	0	0	1	1	1	1	1	0	1	1	0	0	1	1	6	0	0	1	1	1	1	1	5	1	1	0	1	1	4	1	1	0	0	1	1	0	4	1	0	1	0	0	1
1	3	3	0	2	0	0	1	0	0	0	1	0	0	0	1	0	1	0	0	0	2	0	0	1	0	1	1	1	4	1	0	0	1	0	2	0	1	0	0	0	1	0	2	0	1	1	0	0	1
0	5	2	0	0	1	1	0	0	0	0	0	1	1	1	1	0	1	0	0	0	5	3	0	0	1	1	1	1	4	1	0	0	1	1	3	1	1	0	0	1	1	1	5	1	0	1	0	0	2
1	3	2	2	1	1	1	1	0	1	1	0	1	1	0	1	0	1	0	1	1	6	3	1	0	1	1	1	1	5	0	0	0	1	1	2	0	0	1	0	1	1	0	3	1	0	0	0	0	1
1	4	3	0	1	1	1	1	0	0	1	0	1	0	1	1	0	1	0	0	1	5	3	0	0	1	0	1	1	3	1	1	0	1	1	4	1	1	0	0	0	1	1	4	1	1	1	1	0	6
0	2	3	2	1	1	1	1	0	0	1	1	1	1	0	1	0	1	0	0	0	4	0	0	1	1	0	1	1	4	1	1	0	1	0	3	0	1	0	0	0	1	0	2	1	0	0	0	1	2
0	2	3	2	1	1	1	1	0	0	1	1	1	1	0	1	0	1	0	0	0	4	0	0	1	1	0	1	1	4	1	1	0	1	0	3	0	1	0	0	0	1	0	2	1	0	0	0	1	2
1	4	3	2	1	0	1	0	0	0	0	1	1	1	0	1	1	0	0	0	1	5	3	0	0	0	1	1	1	3	1	0	0	1	0	2	0	1	0	0	0	1	0	2	0	1	1	0	0	1
1	2	3	1	2	1	0	1	0	1	0	0	1	1	1	1	1	1	0	1	0	7	3	1	1	1	1	1	1	6	1	1	1	1	1	5	1	1	0	0	1	1	1	5	1	1	1	0	0	1
1	2	3	1	1	0	0	1	0	1	0	1	1	1	1	1	0	1	0	0	1	6	0	1	1	1	1	1	1	6	1	1	1	1	1	5	0	0	0	0	0	1	0	1	0	1	1	0	0	6
1	2	2	2	1	0	0	0	0	1	0	0	0	0	0	1	0	0	0	0	0	1	3	0	0	0	1	1	1	3	0	1	0	0	0	1	1	1	0	0	1	1	1	5	0	0	1	0	0	3
1	2	3	2	2	0	1	1	0	1	0	1	1	1	0	1	1	1	1	1	0	7	3	0	1	1	1	1	1	5	1	1	0	1	1	4	1	1	1	1	0	1	0	5	1	1	0	0	0	1
1	2	3	2	1	1	0	0	0	0	0	0	1	0	1	1	0	0	0	0	1	4	3	0	1	1	1	1	1	5	1	1	1	1	1	5	0	0	0	0	1	1	0	2	1	0	0	0	0	2
1	2	3	2	2	0	1	1	0	1	0	1	1	1	0	1	1	1	1	1	0	7	3	0	1	1	1	1	1	5	1	1	0	1	1	4	1	1	1	1	0	1	0	5	1	1	0	0	0	1
1	4	3	2	1	1	1	0	0	0	0	0	1	0	0	1	1	1	0	1	1	6	5	0	1	1	1	1	0	4	1	0	0	1	0	2	0	0	0	1	1	1	0	3	1	0	0	0	0	3
0	2	3	1	1	1	1	1	0	0	0	1	1	1	0	1	1	1	0	0	0	5	5	0	1	1	1	1	1	5	1	1	1	1	1	5	1	0	0	0	0	1	0	2	1	1	0	0	0	2
1	1	3	1	1	1	0	0	0	0	0	1	1	1	1	1	1	0	0	0	0	5	0	0	1	1	1	1	1	5	1	1	1	1	0	4	0	0	0	1	1	1	0	3	0	1	1	0	0	1
1	3	3	2	1	1	0	0	0	0	0	0	1	1	0	1	0	0	0	1	0	4	0	0	1	1	0	1	1	4	1	1	1	1	1	5	1	1	0	0	1	1	1	5	1	1	0	0	0	1
1	2	3	1	1	1	1	1	0	0	1	1	1	1	1	1	1	0	0	1	1	7	3	1	1	1	0	1	1	5	1	1	1	1	1	5	1	0	1	1	1	1	0	5	1	0	0	0	0	2
1	3	1	2	2	1	0	0	0	0	0	0	1	0	0	0	0	0	0	0	0	1	0	0	1	1	1	1	0	4	0	1	0	1	1	3	0	1	0	1	0	1	0	3	1	1	0	0	0	2
1	2	3	1	2	0	0	0	1	0	0	1	1	1	1	1	1	1	1	1	1	9	3	1	1	1	1	1	1	6	1	1	1	1	1	5	1	1	0	0	1	1	1	5	1	1	1	0	0	3
1	3	3	1	1	1	1	0	0	0	0	0	1	1	1	1	1	1	1	1	1	9	3	0	1	1	1	1	0	4	1	1	0	1	1	4	0	0	1	0	0	1	0	2	1	0	1	0	0	2
1	2	3	1	1	1	1	0	0	1	0	1	1	1	0	1	1	1	0	1	1	7	0	1	1	1	0	1	1	5	1	1	1	1	1	5	1	1	0	0	1	1	1	5	1	1	1	0	0	1
0	2	3	2	2	1	1	1	0	1	0	0	1	0	1	1	0	0	0	0	0	3	2	0	0	1	1	1	1	4	0	1	0	1	1	3	1	1	0	0	1	1	1	5	1	0	0	0	0	2
1	2	3	1	1	1	1	0	0	0	0	0	1	1	0	1	0	1	0	1	0	5	3	0	1	1	1	1	1	5	1	1	1	1	1	5	0	1	0	1	1	1	0	4	1	0	0	0	0	1
0	2	3	1	1	0	0	1	0	0	0	0	1	1	1	1	0	0	0	0	0	4	3	0	1	1	1	1	1	5	1	1	1	1	1	5	1	1	1	0	0	1	1	5	1	0	0	0	0	5
1	4	2	1	2	1	1	1	0	1	1	0	1	1	1	1	0	0	0	1	0	5	0	0	0	1	1	1	1	4	1	1	0	1	1	4	0	1	0	1	0	1	0	3	1	0	0	0	0	2
1	4	2	1	1	0	0	0	0	0	0	1	1	1	1	1	0	0	0	0	0	4	3	0	1	1	0	1	1	4	1	1	0	1	1	4	1	1	0	0	1	1	1	5	1	1	0	0	0	1
1	3	2	2	2	0	0	0	0	0	0	1	1	1	1	1	0	0	0	1	1	6	0	0	0	0	1	1	1	3	1	1	1	1	1	5	0	1	0	1	1	0	0	3	0	0	1	0	0	1
0	3	3	2	2	1	1	0	0	1	0	0	1	0	0	0	0	0	0	0	1	2	3	0	0	1	1	1	1	4	1	0	0	1	0	2	1	1	0	0	1	1	1	5	1	0	1	0	0	3
1	3	3	2	2	0	0	0	0	0	0	1	1	0	1	1	0	1	0	1	1	6	3	0	1	1	1	1	1	5	1	0	1	1	1	4	0	0	1	0	1	1	0	3	1	1	0	0	0	0
0	3	3	2	2	0	0	1	0	1	0	0	1	0	0	1	0	1	0	1	0	4	3	0	1	1	1	1	1	5	1	0	0	1	1	3	0	1	0	1	0	1	0	3	1	1	0	0	0	0
0	1	3	1	1	0	0	0	1	1	0	1	1	1	0	1	1	1	0	0	1	6	3	0	1	1	1	1	1	5	1	1	1	1	1	5	1	1	0	0	1	1	1	5	1	1	0	0	0	1
1	5	2	1	2	1	0	0	0	0	0	0	1	0	0	1	0	0	0	1	1	4	3	0	1	1	0	1	1	4	0	1	1	1	1	4	0	1	0	1	0	1	0	3	1	1	0	0	0	4
1	2	2	2	2	0	1	0	0	1	0	0	1	1	0	1	0	0	0	0	0	3	3	0	1	1	1	1	1	5	1	0	1	1	1	4	0	0	0	0	0	1	0	1	1	1	0	0	0	4
1	0	2	2	1	1	0	0	0	0	1	0	1	1	1	1	1	1	1	1	1	9	3	1	0	1	1	1	1	5	1	1	1	1	1	5	0	1	1	0	0	1	0	3	1	0	0	0	0	2
1	5	3	2	2	1	0	0	0	0	1	0	0	0	0	0	0	1	1	0	0	2	5	0	1	0	1	1	0	3	0	0	1	0	0	1	1	1	0	0	1	1	1	5	1	0	0	0	0	0
1	2	3	1	1	0	0	1	0	1	0	0	1	1	0	1	0	1	0	1	0	5	3	0	1	1	1	1	1	5	1	0	1	1	1	4	1	1	0	0	1	1	1	5	1	1	0	0	0	1
0	1	3	1	1	0	0	0	0	0	0	1	1	1	1	1	1	1	0	0	1	7	0	0	0	0	1	1	1	3	1	0	0	0	0	1	1	1	0	0	1	1	1	5	1	0	0	0	0	0
1	3	2	2	2	1	1	0	0	0	1	0	0	0	0	1	0	0	0	0	0	1	0	1	0	0	1	1	0	3	0	0	0	1	0	1	0	0	0	0	1	1	1	3	1	0	0	0	0	5
0	3	3	1	1	1	1	1	0	0	0	0	1	0	1	1	0	0	0	1	0	4	3	0	1	1	1	1	1	5	1	1	1	1	1	5	1	1	0	0	1	1	0	4	1	1	1	0	0	1
0	6	2	2	2	0	1	0	0	1	0	1	1	0	0	1	0	1	0	0	1	4	3	0	1	1	1	1	1	5	1	0	0	1	1	3	1	1	0	0	0	1	0	3	0	1	1	0	0	1
1	4	3	1	1	0	1	0	0	1	1	1	1	1	1	1	1	1	1	1	1	9	3	0	1	1	0	1	1	4	1	1	1	1	1	5	1	1	1	0	0	1	0	4	1	1	0	0	0	1
1	1	3	2	1	1	1	0	0	0	0	0	1	1	0	1	1	1	1	1	0	7	3	0	1	1	1	1	1	5	1	0	0	1	1	3	1	1	0	0	1	1	1	5	1	0	0	0	0	1
1	2	3	1	1	1	0	1	0	1	0	1	1	1	0	1	0	1	1	1	1	7	0	0	0	1	1	1	1	4	1	1	0	1	1	4	1	1	1	0	1	1	1	6	1	0	0	0	0	1
1	4	2	0	2	0	1	1	0	0	1	0	1	0	0	1	0	1	0	0	0	3	3	0	1	1	1	1	1	5	0	0	0	1	1	2	0	1	0	0	0	0	0	1	1	0	0	0	1	1
1	4	3	2	1	0	1	1	0	1	0	1	1	1	0	1	0	1	1	1	1	7	3	0	1	1	0	0	1	3	1	0	1	1	1	4	1	0	1	1	0	0	0	3	1	1	0	0	0	2
1	5	2	1	1	0	0	0	0	1	0	0	1	1	0	1	0	0	0	1	1	5	3	0	1	1	1	1	1	5	1	1	0	1	1	4	0	1	0	1	1	1	0	4	1	1	0	0	0	1
1	3	3	2	2	1	0	1	0	0	0	1	1	1	0	1	0	1	0	1	0	5	3	1	1	1	1	1	1	6	1	1	1	1	1	5	1	1	0	0	1	1	0	4	1	0	1	0	0	2
1	3	2	1	1	1	1	1	0	0	1	1	1	1	0	1	0	0	0	0	0	3	3	0	1	1	1	1	1	5	1	0	0	1	1	3	1	1	0	0	1	1	0	4	1	0	0	0	0	0
1	5	3	1	1	0	0	1	0	0	0	0	1	1	0	1	0	1	1	1	0	6	0	1	0	1	1	1	1	5	1	0	0	1	1	3	1	1	0	0	1	1	1	5	1	0	0	0	0	6
1	3	3	1	1	1	1	1	0	1	0	0	1	1	1	1	0	1	0	0	1	6	3	0	1	1	1	1	1	5	1	1	1	1	1	5	1	1	0	0	0	1	0	3	0	0	0	0	1	3
1	2	2	2	2	1	1	1	0	0	1	0	1	1	1	1	1	0	0	0	1	6	0	0	1	1	1	0	1	4	1	1	1	1	1	5	0	0	1	0	0	1	0	2	1	0	0	0	0	2
1	1	2	2	1	0	1	1	0	1	0	1	1	1	1	1	1	1	0	0	0	6	3	0	1	1	1	1	1	5	1	1	0	1	1	4	1	1	0	0	1	1	1	5	1	1	0	0	1	1
1	1	2	2	1	1	0	1	0	0	1	0	1	1	1	1	1	0	0	0	0	5	0	1	1	1	0	1	1	5	1	0	1	1	1	4	0	1	0	0	1	1	0	3	1	0	0	0	0	7
1	5	2	1	2	1	0	0	0	0	0	0	1	0	0	1	0	1	0	0	0	3	0	0	1	1	1	1	0	4	1	1	0	1	1	4	1	1	0	1	0	1	1	5	1	0	1	0	0	2
1	3	2	1	1	1	0	0	0	0	0	0	1	1	0	1	0	0	0	1	0	4	0	0	0	1	1	1	1	4	0	1	0	1	1	3	0	1	0	0	0	1	0	2	1	0	1	0	0	4
1	2	1	2	1	1	1	0	0	0	0	0	1	1	1	1	1	1	1	1	1	9	8	1	0	1	1	1	1	5	1	1	1	1	1	5	1	1	0	0	1	1	1	5	1	1	0	1	0	3
1	2	3	1	1	1	1	1	0	1	0	0	1	1	0	1	0	1	0	0	1	5	0	0	1	1	1	1	1	5	1	0	0	1	1	3	0	1	1	1	1	1	1	6	1	0	0	0	0	1
1	1	2	2	1	1	0	1	0	0	1	0	1	1	1	1	1	0	0	0	0	5	0	1	1	1	1	1	1	6	1	0	1	1	1	4	1	1	0	0	1	1	0	4	1	0	0	0	0	7
1	3	3	1	1	1	0	1	1	1	1	1	1	1	0	1	1	1	1	1	1	8	3	0	1	1	1	1	1	5	1	1	0	1	1	4	1	1	0	0	1	1	1	5	1	0	0	0	0	2
1	2	2	2	1	0	0	1	0	0	0	0	1	1	0	1	1	1	1	1	1	8	0	0	1	1	1	1	1	5	1	1	1	1	1	5	1	1	0	0	0	1	0	3	1	0	0	0	0	1
1	2	3	2	2	1	1	1	0	1	1	1	1	1	1	1	1	1	1	1	1	9	8	0	0	1	1	1	1	4	1	1	1	1	1	5	1	0	1	0	1	1	0	4	1	0	0	0	0	5
0	5	3	2	2	0	0	0	0	0	0	1	1	1	1	1	1	1	0	1	1	8	5	0	1	0	1	1	1	4	1	1	0	1	1	4	0	0	1	0	1	1	0	3	1	0	0	0	0	1
0	3	3	2	2	0	1	1	0	1	0	0	1	0	0	1	0	0	0	1	0	3	0	0	1	1	1	1	0	4	1	1	0	1	1	4	0	1	0	0	0	1	0	2	1	0	0	0	1	1
1	5	2	2	1	1	1	0	0	0	0	0	1	1	0	1	1	0	0	1	0	5	3	0	1	1	1	1	1	5	1	0	0	1	1	3	1	1	0	1	1	1	1	6	1	1	0	0	0	0
0	4	2	1	1	1	0	1	0	0	0	1	1	0	0	1	0	0	0	0	1	3	3	0	1	1	1	1	1	5	1	1	0	1	1	4	1	1	0	0	1	1	1	5	0	0	0	0	1	1
1	2	3	2	2	1	1	0	0	0	1	0	1	1	0	1	0	1	0	1	0	5	3	0	1	1	1	0	1	4	1	0	0	1	1	3	1	1	0	0	1	1	0	4	1	1	0	0	0	2
1	2	3	1	1	0	0	0	0	1	0	1	1	1	0	1	0	0	1	0	1	5	3	0	1	0	1	1	1	4	1	1	1	1	1	5	1	0	0	0	1	1	0	3	1	0	0	0	1	1
1	5	3	1	1	1	1	1	0	1	0	1	1	1	1	1	1	1	0	1	1	8	3	0	0	1	1	1	1	4	1	1	1	1	1	5	1	1	0	0	1	1	1	5	1	0	0	0	0	2
0	1	3	1	1	0	0	0	0	0	0	1	1	1	0	1	1	1	0	1	0	6	3	0	1	1	1	1	1	5	1	1	0	1	1	4	1	1	1	1	1	1	0	6	1	1	0	0	0	0
1	6	3	1	1	1	0	0	0	0	0	1	1	1	0	1	1	1	1	1	1	8	8	0	1	1	1	1	1	5	1	0	0	1	1	3	1	1	1	1	0	1	0	5	1	0	0	0	1	2
0	2	3	2	2	1	1	1	0	1	1	1	1	0	0	1	1	1	0	1	0	5	5	0	1	1	0	1	1	4	1	1	1	1	1	5	1	0	1	0	1	1	0	4	1	1	0	0	0	3
1	3	3	1	1	1	1	0	0	0	0	0	0	0	0	1	1	1	0	0	0	3	3	0	0	0	0	1	1	2	1	0	0	1	0	2	0	1	0	0	0	1	1	3	0	1	0	0	0	2
0	1	3	1	1	0	0	0	0	0	0	1	1	0	0	1	1	0	1	1	0	5	4	1	1	1	0	0	1	4	1	1	1	1	1	5	1	1	0	1	1	1	0	5	1	0	0	0	0	1
1	5	3	0	0	1	0	0	0	0	0	0	0	0	0	1	0	1	0	0	0	2	3	1	0	0	1	1	0	3	0	0	0	1	0	1	1	1	0	0	1	1	1	5	0	0	1	0	0	3
0	2	3	2	0	0	0	0	0	0	0	1	1	1	1	1	0	0	1	1	0	6	0	0	1	1	0	1	1	4	1	0	1	1	1	4	1	1	0	0	1	1	0	4	1	1	0	0	0	2
0	5	3	1	1	1	1	1	1	1	1	1	1	1	1	1	1	1	1	1	1	9	3	0	1	1	1	1	1	5	1	1	0	1	1	4	1	1	0	0	1	1	1	5	1	1	0	0	0	1
0	5	3	1	1	1	1	0	0	1	0	1	1	1	0	1	0	1	0	1	1	6	3	1	1	1	0	1	1	5	1	1	1	1	1	5	1	1	0	0	1	1	1	5	1	0	0	0	0	1
1	1	3	2	1	0	0	0	0	0	0	1	1	1	0	1	0	0	0	0	1	4	3	1	1	1	1	1	1	6	0	1	1	1	1	4	1	1	0	0	1	1	1	5	1	0	0	0	0	1
0	2	3	2	0	0	0	0	0	0	0	1	1	1	1	1	0	0	1	1	0	6	0	0	1	1	0	1	1	4	1	0	1	1	1	4	1	1	0	0	1	1	0	4	1	1	0	0	0	2
0	5	3	1	1	0	0	0	0	0	0	1	1	1	1	1	1	1	1	1	1	9	3	0	1	1	1	1	1	5	1	0	0	1	1	3	1	1	1	1	0	1	0	5	1	1	0	0	0	1
1	5	3	1	1	1	0	0	0	0	0	0	1	0	0	0	0	0	0	0	0	1	3	0	0	0	1	1	1	3	0	0	0	1	0	1	1	1	0	0	1	1	1	5	1	0	0	0	0	2
1	5	3	2	2	1	1	1	1	1	1	1	1	1	1	1	1	1	0	1	1	8	0	1	1	1	0	0	1	4	1	1	1	1	1	5	1	1	0	0	1	1	1	5	1	0	0	0	0	6
1	2	3	2	1	1	1	1	0	1	0	0	1	1	0	1	1	1	0	1	1	7	3	0	1	1	1	1	1	5	1	1	1	1	1	5	1	1	0	0	1	1	1	5	0	0	0	0	1	3
1	4	2	2	1	1	1	0	0	0	0	1	1	0	0	1	0	1	0	1	0	4	3	0	1	1	1	1	1	5	1	0	0	1	1	3	0	1	0	1	0	1	0	3	0	1	1	0	0	1
1	5	3	2	2	1	0	0	0	0	0	0	1	0	0	0	0	0	0	0	0	1	3	0	1	1	0	0	1	3	1	1	1	1	1	5	1	0	1	1	0	0	0	3	1	1	0	0	0	2
0	4	3	1	1	1	0	0	0	0	0	1	1	1	1	1	1	1	0	1	1	8	3	0	1	0	1	1	1	4	1	1	1	1	1	5	1	1	1	1	0	1	0	5	1	0	0	0	0	1
1	3	3	1	1	0	1	1	1	1	0	1	1	1	0	1	0	0	1	1	0	5	3	1	1	1	1	1	1	6	1	0	0	1	1	3	1	1	0	0	1	1	1	5	0	0	0	0	1	2
0	3	3	2	1	1	1	1	0	1	0	1	1	1	0	1	1	0	0	1	0	5	3	0	1	1	1	1	1	5	1	1	0	1	1	4	1	1	0	0	1	1	1	5	1	1	1	1	0	1
1	5	3	1	1	0	1	1	0	1	0	1	1	1	0	1	0	1	1	1	1	7	0	0	1	1	1	1	1	5	1	0	0	1	1	3	1	1	0	0	0	1	1	4	1	0	0	0	0	1
0	3	3	2	2	1	1	0	0	0	0	1	1	1	1	1	0	1	0	0	1	6	8	0	0	1	1	1	1	4	1	1	0	1	1	4	1	1	0	0	1	1	0	4	1	0	0	0	0	2
1	4	2	1	1	1	0	0	0	0	0	0	0	0	0	1	0	0	0	0	0	1	0	0	0	1	1	0	0	2	1	0	0	1	1	3	0	0	1	0	0	1	0	2	0	0	1	0	0	3
1	4	1	2	1	1	0	0	0	0	1	1	1	1	1	1	1	0	0	0	0	5	3	0	0	0	1	1	1	3	1	0	0	0	0	1	0	1	0	1	0	1	0	3	0	0	1	0	0	3
1	3	3	2	1	1	1	1	0	1	0	1	1	1	0	0	1	0	0	0	1	4	3	0	1	1	1	1	0	4	0	0	0	1	0	1	1	1	0	0	1	1	1	5	1	0	0	0	0	1
1	1	3	1	1	1	0	1	0	1	0	0	1	1	1	1	0	1	0	1	0	6	0	0	0	0	1	1	1	3	1	0	0	1	1	3	1	1	0	0	1	1	0	4	1	0	0	0	0	2
0	1	3	1	2	0	0	0	0	0	0	1	1	1	0	1	0	0	0	0	1	4	0	0	0	1	1	1	1	4	1	0	1	1	1	4	1	1	0	0	1	1	0	4	1	0	0	0	0	1
0	5	3	2	2	1	1	1	0	0	0	0	1	1	0	1	1	1	1	1	0	7	3	0	1	1	1	1	1	5	1	1	1	1	1	5	1	1	0	0	0	1	1	4	1	1	0	0	0	2
1	3	3	1	1	0	0	0	0	0	0	1	0	0	0	1	0	0	0	0	0	1	0	0	1	0	1	1	0	3	0	0	0	1	0	1	0	1	0	1	1	1	1	5	1	0	0	0	0	0
1	2	3	0	1	1	1	1	0	1	0	0	1	0	1	1	1	1	0	1	0	6	5	0	0	1	1	1	1	4	1	0	0	1	1	3	0	1	0	0	1	1	0	3	1	0	0	0	0	1
1	4	3	1	1	1	0	0	0	1	0	0	1	0	0	1	1	1	0	0	1	5	0	0	1	1	1	1	0	4	1	1	1	1	1	5	1	1	1	1	0	1	0	5	1	0	0	0	0	1
1	2	3	1	1	1	0	0	0	0	1	0	1	0	1	1	0	0	0	0	0	3	2	0	1	1	1	1	1	5	1	1	0	1	1	4	0	1	0	0	0	1	1	3	1	0	1	0	0	1
0	5	3	1	1	1	1	0	0	0	0	1	1	1	0	1	1	1	0	1	0	6	3	0	1	1	1	1	1	5	1	1	1	1	1	5	1	1	0	0	0	1	0	3	1	1	1	0	0	1
1	2	3	2	1	0	0	0	0	0	0	1	1	1	0	1	1	1	0	0	0	5	3	0	1	1	1	1	1	5	1	0	1	1	1	4	0	1	0	0	1	1	0	3	1	0	0	0	0	1
1	1	3	1	1	1	0	0	0	0	0	1	1	0	0	1	0	1	1	1	0	5	0	0	1	1	1	0	1	4	1	1	0	1	1	4	1	1	0	0	1	1	1	5	1	0	0	0	0	1
1	4	2	2	2	1	1	1	0	0	1	1	1	0	0	1	1	1	0	1	1	6	3	0	1	1	1	1	1	5	1	1	1	1	1	5	1	0	0	0	1	1	1	4	1	1	0	0	0	2
1	0	2	2	2	1	0	0	0	0	0	0	1	0	1	1	0	0	0	1	0	4	0	0	0	0	0	1	1	2	1	0	1	1	0	3	1	1	0	0	1	1	0	4	1	0	0	0	0	4
1	3	3	1	1	0	0	1	0	1	0	1	1	1	0	1	1	0	0	0	0	4	3	0	1	1	1	1	1	5	1	1	1	1	1	5	1	1	0	0	1	1	1	5	1	0	0	0	0	1
1	2	3	2	2	1	1	0	0	0	0	0	1	1	1	1	0	0	0	0	1	5	3	0	0	1	1	1	1	4	1	0	1	1	1	4	1	1	0	0	1	1	1	5	1	0	0	0	0	4
0	4	3	1	1	0	1	0	0	1	0	1	1	1	1	1	1	0	0	0	0	5	3	0	0	1	1	1	1	4	1	1	1	1	1	5	1	1	0	0	1	1	1	5	1	0	0	0	0	1
1	2	2	1	1	1	0	1	0	1	0	0	1	1	0	1	0	0	0	1	0	4	0	0	1	1	1	1	1	5	1	1	0	1	1	4	0	1	0	1	1	1	1	5	1	0	0	0	0	1
1	2	3	2	2	1	0	0	0	0	0	0	1	1	0	1	0	1	0	0	1	5	3	0	1	1	0	1	1	4	1	1	1	1	1	5	0	1	0	1	1	1	0	4	1	0	0	0	0	5
1	2	3	2	1	1	0	0	0	0	0	0	1	1	1	1	1	1	0	0	0	6	0	0	1	1	1	1	1	5	1	1	1	1	1	5	1	1	0	0	1	1	1	5	1	0	0	0	0	4
1	2	2	1	1	1	0	0	0	1	1	1	1	1	0	1	0	1	0	1	0	5	3	0	1	1	1	1	1	5	1	0	1	1	1	4	1	1	0	0	1	1	1	5	1	1	0	0	0	0
1	3	0	2	1	1	0	0	0	0	0	0	0	0	0	0	0	0	0	1	0	1	2	0	0	0	1	1	1	3	0	0	0	1	0	1	0	1	0	0	1	1	0	3	1	0	0	0	0	3
1	3	3	0	1	1	0	0	0	0	0	0	0	0	1	0	0	0	0	0	0	1	3	0	1	0	1	1	1	4	0	0	1	1	1	3	0	0	1	0	0	1	0	2	1	0	0	0	0	5
1	1	1	1	1	0	0	0	0	0	1	0	1	0	0	0	0	0	0	0	0	1	0	0	0	1	1	1	0	3	1	0	0	0	0	1	0	0	0	0	1	1	1	3	1	0	0	0	0	7
1	3	3	1	1	1	0	1	0	1	0	1	1	1	0	1	1	1	0	1	1	7	3	0	1	1	0	1	1	4	1	1	0	1	1	4	1	1	0	1	0	1	0	4	1	1	0	0	0	1
1	2	3	1	1	1	1	1	0	0	1	1	1	1	1	1	1	1	0	0	0	6	0	0	1	1	0	1	1	4	1	1	1	1	1	5	0	0	1	1	0	1	0	3	1	0	1	0	0	2
1	1	1	1	1	0	0	0	0	1	0	1	1	1	1	1	1	1	0	0	1	7	3	1	1	1	1	1	1	6	1	1	1	1	1	5	1	1	0	0	1	1	0	4	1	0	0	0	0	1
1	1	1	1	1	0	0	0	0	1	0	1	1	1	1	1	1	1	0	0	1	7	3	1	1	1	1	1	1	6	1	1	1	1	1	5	1	1	0	0	1	1	0	4	1	0	0	0	0	1
1	4	3	1	1	1	1	1	0	0	0	0	1	1	1	1	0	1	0	1	0	6	3	0	1	1	1	0	1	4	1	0	0	1	1	3	1	1	0	1	1	1	0	5	1	1	0	0	0	3
1	2	3	1	1	1	0	0	0	0	0	0	1	0	0	0	0	0	0	0	0	1	8	0	0	1	1	1	0	3	0	0	0	1	0	1	0	1	0	0	0	1	1	3	1	0	0	0	0	4
1	1	3	1	1	0	0	0	0	1	0	1	1	0	0	1	1	1	0	1	1	6	3	0	1	1	1	1	0	4	1	0	0	1	0	2	1	1	0	0	1	1	1	5	1	0	0	0	0	1
0	0	2	2	2	0	0	1	0	0	0	0	1	1	0	1	1	1	1	0	1	7	3	0	0	1	1	1	0	3	1	1	1	1	1	5	1	1	0	0	1	1	1	5	0	0	1	0	0	4
1	6	3	1	1	0	0	0	1	1	0	0	1	0	0	1	1	1	0	0	1	5	8	0	1	1	1	1	1	5	1	1	0	1	1	4	1	1	0	0	1	1	1	5	1	0	0	0	0	1
0	3	2	2	1	1	0	0	0	0	0	0	1	0	0	0	0	0	0	0	0	1	0	0	0	0	1	1	1	3	0	0	0	1	0	1	0	1	0	1	1	1	1	5	0	0	1	0	0	4
1	2	3	2	1	1	1	1	0	0	1	1	1	1	1	1	1	1	1	1	1	9	8	0	1	1	1	1	1	5	1	1	1	1	1	5	0	0	1	1	0	1	0	3	1	0	1	0	0	3
1	2	3	2	1	1	1	1	0	0	1	1	1	1	1	1	1	1	1	1	1	9	8	0	1	1	1	1	1	5	1	1	1	1	1	5	0	0	1	1	0	1	0	3	1	0	1	0	0	3
1	2	3	2	1	1	0	0	0	0	0	1	1	1	1	1	1	1	0	1	1	8	1	0	1	0	0	1	1	3	1	1	0	1	1	4	1	1	0	0	1	1	1	5	1	0	0	0	0	7
1	2	3	2	2	0	0	0	1	1	0	1	1	0	0	1	0	0	0	0	0	2	3	0	1	1	1	1	0	4	1	0	0	1	0	2	0	1	0	1	0	1	0	3	1	0	0	0	1	1
1	2	3	2	2	0	0	0	1	1	0	1	1	0	0	1	0	0	0	0	0	2	3	0	1	1	1	1	0	4	1	0	0	1	0	2	0	1	0	1	0	1	0	3	1	0	0	0	1	1
1	2	3	2	2	0	0	0	1	1	0	1	1	0	0	1	0	0	0	0	0	2	3	0	1	1	1	1	0	4	1	0	0	1	0	2	0	1	0	1	0	1	0	3	1	0	0	0	1	1
1	2	3	1	1	1	1	1	0	0	0	0	1	0	0	1	1	1	0	1	1	6	0	1	1	1	0	1	1	5	1	1	1	1	1	5	1	1	0	0	1	1	1	5	1	1	0	0	0	4
0	2	3	1	1	1	0	0	1	0	1	1	1	1	1	1	0	1	0	0	0	5	3	1	1	1	0	0	1	4	1	1	1	1	1	5	1	1	0	0	1	1	0	4	1	1	1	0	0	1
0	1	3	1	2	1	1	0	0	0	0	1	1	1	0	1	1	0	1	1	1	7	3	1	1	1	0	1	1	5	1	1	1	1	1	5	1	1	1	1	0	1	0	5	1	1	0	0	0	1
0	4	3	1	1	0	1	0	0	0	0	0	1	1	0	1	1	0	0	1	0	5	3	0	1	1	1	1	1	5	1	1	1	1	1	5	1	1	0	0	1	1	1	5	1	0	0	0	0	1
1	1	1	2	2	1	0	1	0	0	0	1	1	1	0	1	0	0	0	1	0	4	0	0	0	0	1	1	1	3	0	0	0	1	1	2	1	1	0	0	1	1	0	4	1	1	1	0	0	4
1	2	3	2	2	1	0	0	0	0	1	0	1	1	1	1	1	1	0	0	0	6	0	0	1	1	1	1	1	5	1	1	0	1	1	4	0	0	1	0	1	1	0	3	1	0	1	0	0	3
1	2	3	2	1	1	0	0	0	1	1	1	1	1	0	1	1	1	1	1	0	7	3	0	1	1	1	1	1	5	1	1	1	1	1	5	1	1	0	1	0	1	0	4	1	1	0	0	0	1
1	2	3	1	1	0	1	1	0	1	0	1	1	1	1	1	0	1	0	0	0	5	3	0	0	0	1	1	1	3	1	1	0	1	1	4	0	0	0	1	1	1	0	3	1	1	0	0	0	4
1	2	3	1	1	0	1	0	0	0	0	1	1	0	0	1	0	1	0	0	0	3	3	0	1	0	1	1	0	3	1	0	1	0	0	2	0	1	0	1	1	1	0	4	0	0	0	0	1	1
1	3	3	2	1	1	1	1	0	1	0	1	1	1	0	1	1	0	0	1	1	6	3	0	0	1	1	1	1	4	0	1	0	1	1	3	0	0	0	0	1	1	0	2	1	0	0	0	0	6
1	1	2	1	1	1	0	0	0	1	0	1	1	1	1	1	0	0	0	1	0	5	3	1	1	1	1	1	1	6	1	0	1	1	1	4	1	1	0	0	1	1	1	5	1	0	0	0	1	1
0	4	3	1	1	0	1	1	0	1	0	1	1	1	1	1	1	0	0	1	1	7	3	1	1	1	1	1	1	6	1	1	1	1	1	5	0	1	0	0	0	1	0	2	0	1	0	0	0	1
1	3	3	2	2	0	0	0	0	1	0	0	1	1	0	0	1	1	0	1	0	5	0	0	1	1	1	1	1	5	1	0	0	1	1	3	0	1	0	1	1	1	0	4	0	0	1	0	0	4
0	1	3	2	2	1	1	1	0	0	0	0	1	0	0	1	0	0	0	1	1	4	3	0	0	1	1	1	1	4	1	0	1	1	0	3	1	1	1	0	1	1	1	6	0	1	0	0	0	1
1	5	3	1	1	1	1	0	0	1	0	1	1	1	1	1	0	1	1	1	0	7	1	0	1	1	1	0	1	4	1	0	0	1	1	3	1	1	0	0	0	1	0	3	1	0	0	0	0	3
1	4	2	1	1	1	1	1	0	0	1	1	1	1	0	1	1	1	1	0	0	6	3	0	1	1	1	1	1	5	1	0	1	1	1	4	1	1	0	0	1	1	1	5	1	0	0	0	0	3
1	1	2	2	1	1	1	0	0	1	1	1	1	1	1	1	1	0	0	0	0	5	3	0	1	1	0	0	1	3	1	1	1	1	1	5	0	1	0	1	1	1	0	4	1	1	0	0	0	2
1	2	3	0	2	0	0	0	0	0	0	1	1	1	0	1	0	0	0	0	1	4	3	0	0	1	1	1	1	4	1	1	0	1	1	4	1	1	0	0	1	1	1	5	1	0	0	0	0	2
1	1	3	2	2	0	0	1	0	1	0	1	1	0	0	1	0	1	0	1	0	4	3	0	0	1	0	1	1	3	1	1	0	1	1	4	1	1	0	0	1	1	1	5	1	0	0	0	0	1
1	2	3	2	2	1	1	0	0	0	0	0	1	1	1	1	0	0	0	0	0	4	0	0	0	1	1	1	1	4	1	0	0	1	1	3	1	1	0	0	1	1	1	5	1	1	0	0	0	1
1	2	3	2	1	1	0	0	0	1	1	1	1	1	0	1	1	1	0	1	1	7	0	0	1	1	1	1	1	5	1	1	1	1	1	5	1	1	1	0	1	1	0	5	1	1	1	0	0	1
0	4	3	1	1	0	0	0	0	1	0	1	1	0	1	1	1	1	0	1	0	6	3	0	1	1	1	0	1	4	0	1	0	1	1	3	0	1	1	0	1	1	0	4	1	1	0	0	0	3
1	1	3	0	1	0	0	0	0	0	0	1	1	0	0	1	1	1	0	1	0	5	0	0	1	1	0	1	1	4	1	1	1	1	1	5	1	1	0	0	1	1	1	5	1	0	0	0	0	1
1	1	2	2	1	0	0	0	0	0	0	1	1	1	0	1	0	0	0	0	0	3	3	0	1	1	1	1	1	5	1	0	0	1	1	3	1	1	1	0	1	1	1	6	1	0	0	0	0	0
0	1	3	1	1	1	1	1	1	1	1	1	1	1	1	1	1	1	0	1	0	7	3	1	1	1	0	0	1	4	1	1	1	1	1	5	1	1	0	0	1	1	1	5	1	1	0	0	0	1
1	1	3	2	2	1	0	1	0	1	0	1	1	0	0	1	1	0	1	1	1	6	0	0	1	1	1	1	0	4	1	0	0	1	1	3	0	0	1	0	1	1	1	4	0	0	0	0	1	1
0	1	2	1	2	1	0	0	0	1	0	1	0	0	0	1	1	0	0	0	1	3	3	0	1	1	1	1	1	5	1	0	0	1	1	3	1	1	0	0	1	1	1	5	0	0	0	0	1	0
1	4	3	1	1	1	1	1	1	1	1	1	1	1	1	1	1	1	0	1	0	7	0	0	1	1	1	1	1	5	1	1	1	1	1	5	1	1	1	1	0	0	0	4	1	1	1	0	0	0
1	0	2	2	2	1	0	1	1	1	0	0	1	1	1	1	1	1	0	1	1	8	3	0	0	1	1	1	1	4	1	0	1	1	1	4	1	0	0	0	0	1	1	3	1	0	0	0	0	1
0	3	3	2	1	1	1	1	1	1	1	1	1	1	0	1	1	1	0	1	0	6	5	1	1	1	0	1	1	5	1	1	1	1	1	5	1	0	1	1	0	0	0	3	1	1	1	1	0	1
0	3	3	2	1	1	1	1	1	1	1	1	1	1	0	1	1	1	0	1	0	6	5	1	1	1	0	1	1	5	1	1	1	1	1	5	1	0	1	1	0	0	0	3	1	1	1	1	0	1
1	2	3	1	2	1	0	1	0	1	0	0	1	1	0	1	1	0	0	1	1	6	3	0	1	1	1	1	1	5	1	0	0	1	1	3	1	1	0	0	1	1	0	4	1	0	1	0	0	2
1	2	3	2	2	1	1	1	0	0	0	0	1	1	1	1	1	1	1	1	1	9	0	0	1	1	1	1	1	5	1	1	1	1	1	5	1	0	1	1	0	0	0	3	1	1	0	0	0	2
1	0	2	1	2	1	0	0	0	1	0	1	1	1	1	1	1	1	0	1	1	8	0	0	1	0	1	1	1	4	1	1	1	1	1	5	1	1	0	0	1	1	1	5	1	0	0	0	0	1
1	2	3	2	2	1	1	0	0	0	0	0	1	1	0	1	0	0	0	0	0	3	0	0	0	0	1	1	1	3	1	0	0	1	1	3	1	1	0	1	1	1	1	6	1	1	1	0	0	4
1	1	3	1	1	1	0	0	0	1	0	1	1	1	0	1	0	0	0	1	1	5	3	0	1	0	1	1	1	4	1	0	0	1	1	3	1	1	0	0	1	1	1	5	0	0	0	0	1	1
1	1	2	1	1	1	0	0	0	1	0	1	1	1	1	1	0	1	0	0	1	6	3	0	1	1	1	1	1	5	1	0	0	1	1	3	1	1	1	0	1	1	1	6	1	1	0	0	0	1
1	2	2	1	1	1	0	1	0	0	0	1	1	1	1	1	1	0	1	0	0	6	0	0	0	1	1	1	1	4	1	1	1	1	1	5	0	1	0	0	1	1	0	3	1	1	1	0	0	6
0	1	3	0	2	1	1	0	0	1	0	1	1	1	0	0	0	0	0	1	0	3	0	0	1	1	1	1	1	5	0	1	1	1	1	4	1	1	0	0	1	1	0	4	1	0	0	0	0	1
1	4	3	1	1	0	0	0	0	0	0	1	1	0	0	1	0	0	0	0	0	2	0	0	1	1	1	1	1	5	1	0	0	1	0	2	1	1	0	0	1	1	1	5	1	0	0	0	0	1
0	1	3	0	2	1	1	0	0	1	0	1	1	1	0	0	0	0	0	1	0	3	0	0	1	1	1	1	1	5	0	1	1	1	1	4	1	1	0	0	1	1	0	4	1	0	0	0	0	1
0	1	3	0	2	1	1	0	0	1	0	1	1	1	0	0	0	0	0	1	0	3	0	0	1	1	1	1	1	5	0	1	1	1	1	4	1	1	0	0	1	1	0	4	1	0	0	0	0	1
1	4	3	2	2	1	0	0	0	0	0	0	1	1	0	1	1	0	0	0	1	5	3	0	0	1	1	1	0	3	0	1	0	1	0	2	0	1	0	0	1	1	0	3	1	0	0	0	0	4
0	5	3	1	1	0	1	1	0	0	0	1	1	1	1	1	1	1	1	1	0	8	3	0	1	1	1	1	1	5	1	1	0	1	1	4	0	1	0	1	0	1	1	4	1	1	0	0	0	1
1	2	3	1	1	1	0	0	0	1	1	1	1	1	1	1	0	0	0	1	0	5	2	0	1	1	1	1	1	5	1	0	1	1	1	4	1	1	0	0	1	1	1	5	1	1	1	0	0	1
1	4	3	1	1	0	0	1	0	0	0	0	1	1	0	1	0	0	0	0	0	3	3	0	1	1	1	1	0	4	0	1	0	1	0	2	1	1	0	0	1	1	0	4	1	0	1	0	0	1
1	3	2	2	1	1	1	0	0	1	0	1	0	0	0	0	0	1	0	1	1	3	3	0	1	1	1	1	1	5	0	1	0	1	1	3	0	1	0	0	1	1	0	3	0	0	1	0	0	1
1	4	1	1	1	1	0	1	0	0	0	1	1	0	1	1	0	1	0	0	0	4	3	0	1	1	1	1	1	5	0	1	1	1	1	4	0	0	1	0	1	1	0	3	1	0	1	0	0	1
1	2	3	1	1	1	0	0	0	1	1	1	1	1	1	1	0	0	0	0	0	4	2	0	1	1	1	1	1	5	1	0	1	1	1	4	1	1	0	0	1	1	1	5	1	1	1	0	0	1
1	5	3	1	1	0	0	1	0	0	0	0	1	1	1	1	1	1	1	1	1	9	2	1	1	1	0	1	0	4	1	1	1	1	1	5	1	0	1	1	1	1	1	6	1	0	0	0	0	2
1	0	2	0	1	1	0	0	0	0	1	0	1	0	0	1	0	1	1	0	0	4	3	0	0	0	1	1	1	3	1	1	1	1	1	5	1	1	0	0	1	1	0	4	1	0	0	0	0	1
1	2	3	1	1	1	1	1	1	1	1	1	1	1	0	1	1	1	1	1	1	8	3	0	1	1	1	1	1	5	1	1	1	1	1	5	0	1	1	1	1	1	0	5	1	1	1	0	0	1
0	2	3	1	1	0	0	0	0	1	0	1	1	1	0	1	1	1	0	1	1	7	3	0	1	1	1	1	1	5	1	1	1	1	1	5	1	1	0	0	1	1	1	5	1	1	0	0	0	1
0	5	3	1	1	0	0	0	0	1	0	0	1	0	0	1	0	0	0	0	0	2	3	0	1	1	1	1	0	4	1	1	0	1	1	4	1	1	0	0	1	1	1	5	1	0	0	0	0	1
1	5	3	0	2	1	1	1	1	1	1	1	1	1	1	1	1	1	1	1	1	9	3	1	1	1	0	1	1	5	1	1	1	1	1	5	1	1	1	1	0	1	1	6	1	1	0	1	0	1
1	2	3	2	1	1	1	1	1	1	1	1	1	0	0	0	0	1	0	0	1	3	0	1	0	1	0	1	1	4	1	1	1	1	1	5	1	1	0	0	1	1	1	5	1	1	1	1	0	4
0	2	3	1	1	0	0	0	0	1	0	1	1	1	1	1	0	0	0	0	1	5	1	0	1	1	1	1	1	5	1	1	1	1	1	5	0	0	1	0	0	1	0	2	1	0	0	0	0	1
1	4	3	1	1	0	0	0	0	1	0	1	1	1	1	1	0	1	0	1	1	7	3	0	1	1	1	1	1	5	1	1	1	1	1	5	1	0	1	1	0	1	0	4	1	0	0	0	0	1
1	2	3	1	1	1	0	0	0	0	0	1	1	1	0	1	1	1	0	1	1	7	3	0	1	1	1	1	1	5	1	1	0	1	1	4	1	1	1	0	1	1	0	5	1	0	0	0	0	2
1	1	3	1	1	1	0	0	0	1	1	1	1	1	0	1	1	0	0	1	0	5	3	0	1	1	0	1	1	4	1	1	1	1	1	5	1	1	0	0	1	1	1	5	1	0	0	0	0	1
1	4	3	0	0	1	1	0	0	1	1	0	1	1	0	1	0	0	0	1	1	5	0	0	1	1	1	1	1	5	1	0	0	1	1	3	1	1	0	1	0	1	0	4	1	1	0	0	0	2
0	3	3	1	1	0	0	0	0	0	0	1	1	0	0	1	0	0	1	0	1	4	0	0	1	0	1	1	0	3	0	0	0	0	1	1	1	1	0	0	0	1	0	3	1	0	0	0	0	0
1	2	3	1	1	0	0	0	0	1	0	0	1	0	0	1	0	1	0	1	0	4	3	0	1	1	1	1	1	5	1	1	0	1	1	4	1	1	0	0	1	1	1	5	1	1	0	0	0	1
0	2	3	1	1	0	0	0	0	0	0	1	1	1	1	1	1	1	0	0	1	7	0	1	1	1	1	1	1	6	1	1	1	1	1	5	1	1	1	1	0	1	0	5	1	0	0	0	0	1
1	1	2	2	1	0	1	0	1	1	0	1	1	1	1	1	1	1	1	1	1	9	3	1	1	1	1	1	1	6	1	1	1	1	1	5	1	1	0	1	0	1	0	4	1	0	0	0	0	1
1	1	3	2	2	1	1	0	0	1	1	1	1	0	0	1	1	0	0	0	0	3	3	0	1	1	0	1	1	4	1	1	1	1	1	5	0	1	0	0	0	0	0	1	1	0	0	0	0	1
0	1	3	2	2	0	0	0	1	1	0	1	1	1	0	1	0	0	0	1	0	4	3	1	1	0	1	1	1	5	1	0	0	1	1	3	1	0	1	1	1	1	1	6	1	1	0	0	0	1
1	2	3	1	1	0	0	1	0	0	0	0	1	1	1	1	1	0	0	0	0	5	3	0	1	1	1	1	1	5	0	1	1	1	1	4	0	0	0	0	1	1	0	2	1	0	0	0	0	6
1	4	2	1	1	1	0	1	0	1	1	1	1	1	0	1	1	1	1	1	1	8	3	0	1	1	1	1	0	4	1	1	0	1	1	4	1	1	0	0	0	1	0	3	1	0	0	0	0	1
1	5	3	1	1	1	1	1	0	0	1	0	1	1	0	1	1	1	0	1	1	7	5	0	1	1	1	1	1	5	1	1	1	1	1	5	0	0	1	1	0	0	0	2	1	1	0	0	0	1
0	1	2	1	1	0	0	0	0	1	0	1	1	1	1	1	1	0	0	0	1	6	3	0	1	0	1	1	0	3	1	1	0	1	1	4	1	1	0	0	1	1	1	5	1	1	0	0	0	1
1	6	3	1	1	0	0	0	0	1	0	1	1	1	0	1	1	0	0	1	0	5	3	0	1	1	1	1	1	5	1	0	1	1	0	3	1	1	0	1	0	1	1	5	1	1	0	0	0	1
1	2	2	2	2	1	0	1	0	0	1	0	1	0	0	1	0	0	0	1	0	3	3	0	1	1	1	1	1	5	1	0	0	1	1	3	1	1	0	0	1	1	0	4	1	1	0	0	0	2
0	3	2	1	1	1	0	1	0	0	0	1	1	1	1	0	0	0	0	0	0	3	2	0	0	1	1	1	1	4	1	0	1	0	1	3	0	1	0	0	1	1	0	3	1	0	0	0	0	2
1	3	1	2	1	1	0	0	0	0	0	0	1	0	0	0	0	0	0	0	0	1	0	0	0	0	1	1	1	3	1	0	0	0	0	1	0	1	0	0	0	1	1	3	0	0	1	0	0	3
1	2	3	1	1	1	0	0	0	0	1	1	1	1	0	1	0	0	0	1	0	4	3	0	0	1	1	1	1	4	1	1	1	1	1	5	1	1	1	1	0	1	0	5	1	1	1	0	0	1
1	2	3	1	1	1	0	1	0	0	0	0	1	1	0	1	1	0	0	1	1	6	3	0	1	1	1	1	1	5	1	1	0	1	1	4	1	1	0	0	1	1	1	5	1	0	0	0	0	2
1	3	3	2	1	0	0	0	0	1	0	1	1	1	0	1	0	0	0	1	1	5	0	0	1	1	1	1	1	5	1	1	1	1	1	5	0	1	0	0	0	1	0	2	1	1	0	0	0	4
1	1	3	1	1	1	0	0	0	0	0	0	0	1	1	1	1	0	1	1	0	6	2	0	0	0	1	1	1	3	1	1	1	1	1	5	0	0	0	0	1	1	0	2	1	0	0	0	0	5
1	3	3	2	2	1	1	1	0	1	0	1	1	1	0	1	0	1	0	1	0	5	3	0	1	1	0	1	1	4	1	0	0	1	1	3	1	1	0	0	1	1	1	5	1	1	0	0	0	1
1	2	3	1	1	1	0	1	0	1	0	0	1	1	1	1	1	1	0	1	1	8	3	0	1	1	1	1	1	5	1	1	0	1	1	4	1	1	0	0	0	1	0	3	1	0	0	0	0	2
1	3	3	1	1	0	0	0	0	0	0	1	1	1	0	1	0	0	0	0	0	3	3	0	1	1	1	1	0	4	1	0	0	1	0	2	1	1	0	0	1	1	1	5	1	0	0	0	0	4
1	3	3	2	2	1	1	0	0	0	1	1	1	1	1	1	1	1	1	1	1	9	3	0	1	1	1	1	1	5	1	1	0	1	1	4	1	1	0	0	1	1	1	5	1	1	0	0	0	1
1	2	2	1	1	1	0	0	0	1	0	1	1	0	0	1	0	1	1	0	1	5	3	0	0	1	1	1	1	4	1	1	1	1	1	5	0	1	0	0	1	1	0	3	1	0	1	0	0	5
1	3	3	0	2	1	1	0	0	0	1	1	1	1	1	1	1	1	0	0	0	6	3	0	1	1	1	1	1	5	1	0	1	1	1	4	1	1	0	1	1	1	0	5	1	1	0	0	0	1
1	2	3	1	2	1	1	0	0	0	1	1	1	1	0	1	1	1	0	1	1	7	0	0	1	1	1	0	1	4	1	1	1	1	1	5	1	1	0	0	1	1	1	5	1	1	0	0	0	2
1	2	3	2	1	1	0	0	0	0	0	1	1	0	0	0	1	0	0	0	0	2	0	0	1	1	1	1	1	5	1	0	0	1	1	3	0	1	1	1	1	1	1	6	0	1	1	0	0	1
1	3	3	1	1	1	0	0	0	0	0	0	1	1	1	1	1	1	1	1	1	9	3	0	1	1	1	1	1	5	1	1	1	1	1	5	0	1	1	1	0	1	0	4	1	0	0	0	0	4
1	2	3	1	1	1	0	0	0	0	1	1	1	1	1	1	1	0	1	1	1	8	3	0	1	1	0	1	1	4	1	0	1	1	1	4	1	1	0	0	0	1	0	3	1	1	1	0	0	2
0	2	3	2	1	1	1	0	0	0	0	0	1	1	0	1	0	0	0	0	0	3	3	0	1	1	1	1	1	5	0	1	0	1	1	3	1	1	0	0	1	1	1	5	1	0	0	0	0	1
1	3	3	2	1	1	1	1	0	1	1	1	1	1	0	1	0	0	0	1	0	4	1	0	1	1	1	1	1	5	1	1	1	1	1	5	1	1	0	0	1	1	1	5	1	1	0	0	0	1
0	3	3	1	1	0	1	0	0	1	0	1	1	1	1	1	1	1	0	1	0	7	0	0	1	0	1	1	0	3	1	1	1	1	1	5	0	0	1	1	0	1	0	3	1	0	0	0	0	4
1	2	3	2	1	1	0	0	0	0	0	1	1	1	0	1	0	1	0	1	0	5	0	0	1	1	0	1	1	4	1	1	1	1	0	4	0	1	0	0	1	1	0	3	1	0	0	0	0	2
1	2	3	2	1	1	0	0	0	0	0	1	1	1	0	1	0	1	0	1	0	5	0	0	1	1	0	1	1	4	1	1	1	1	0	4	0	1	0	0	1	1	0	3	1	0	0	0	0	2
1	2	3	1	1	0	0	0	0	1	0	0	1	1	0	1	1	1	0	0	0	5	3	0	1	1	1	1	1	5	1	0	0	1	1	3	1	0	0	0	1	1	1	4	1	0	0	0	0	2
1	5	3	1	1	1	1	1	0	1	1	1	1	1	0	1	1	1	1	1	1	8	3	0	1	1	1	1	1	5	1	1	0	1	1	4	1	1	1	1	1	1	1	7	1	0	1	0	0	1
1	2	3	1	1	1	1	1	0	1	0	1	1	1	0	1	1	1	1	1	0	7	3	0	1	1	1	1	1	5	1	1	1	1	1	5	1	1	0	0	1	1	1	5	0	0	1	1	0	4
1	2	3	0	1	0	0	0	0	0	0	1	1	0	0	0	0	0	0	0	0	1	3	1	0	0	1	1	1	4	1	0	0	0	0	1	1	1	0	0	1	1	1	5	0	0	1	0	0	1
0	3	3	1	1	1	1	1	0	1	1	1	1	1	0	1	1	1	0	1	1	7	0	0	1	1	0	0	1	3	1	1	1	1	1	5	1	1	0	0	1	1	1	5	1	0	0	0	0	1
0	4	3	2	1	0	1	0	0	0	0	1	1	0	0	1	0	0	1	0	1	4	3	0	1	1	1	1	1	5	1	1	1	1	1	5	0	0	0	0	1	1	0	2	0	0	0	0	1	1
1	2	3	2	1	0	1	1	0	0	1	1	1	1	1	1	0	1	0	0	1	6	0	0	1	1	1	1	1	5	1	1	1	1	1	5	0	1	1	1	1	1	0	5	1	0	1	0	0	1
0	3	3	1	1	1	1	1	1	1	1	1	1	0	0	1	1	0	0	1	0	4	3	0	1	1	0	1	1	4	1	1	1	1	1	5	1	1	1	1	0	1	0	5	1	0	0	0	0	2
1	3	2	1	1	1	1	0	0	1	0	1	1	1	0	1	1	0	0	1	1	6	0	0	1	1	0	1	1	4	1	0	1	1	1	4	1	1	0	0	0	1	0	3	1	1	0	0	0	2
1	3	3	2	1	1	0	1	0	1	0	1	1	1	1	1	1	1	1	1	0	8	3	1	1	1	1	1	1	6	1	1	1	1	1	5	1	1	0	0	1	1	1	5	1	1	0	0	0	1
1	1	2	1	2	0	0	0	0	0	0	1	1	1	1	1	0	1	0	0	0	5	3	0	1	1	0	1	1	4	1	1	1	0	1	4	1	0	1	0	1	1	0	4	1	0	0	0	1	1
1	2	3	1	1	1	1	1	0	1	0	1	1	1	0	1	1	0	0	1	1	6	3	0	1	1	1	1	1	5	1	1	0	1	1	4	1	1	1	0	0	1	1	5	1	1	0	0	0	1
1	2	3	2	1	1	1	1	0	1	0	1	1	1	0	1	1	1	1	1	1	8	3	0	1	1	0	0	1	3	0	0	1	1	1	3	1	1	0	0	1	1	0	4	1	1	0	0	0	3
1	2	3	1	1	1	1	0	0	1	0	1	1	1	1	1	1	1	0	1	1	8	3	0	1	1	1	1	1	5	1	1	0	1	1	4	0	1	0	1	0	1	0	3	1	1	0	0	0	1
1	3	3	2	2	1	0	0	0	1	0	1	1	1	0	1	1	0	1	1	1	7	3	0	1	1	1	1	1	5	1	1	1	1	1	5	1	1	1	1	0	1	0	5	1	0	0	0	0	1
1	2	3	1	1	1	0	0	0	0	0	0	0	0	0	1	0	0	0	0	0	1	3	0	1	0	1	1	0	3	0	0	0	1	0	1	0	1	0	0	0	1	1	3	0	0	0	0	1	1
0	4	3	2	1	1	1	1	0	0	0	0	1	1	1	1	1	0	0	1	0	6	3	0	0	1	1	1	1	4	1	1	1	1	1	5	1	1	0	0	1	1	0	4	1	0	0	0	0	1
0	3	3	2	1	1	1	0	0	1	0	1	1	1	0	1	1	1	0	1	0	6	5	1	1	1	1	0	1	5	1	1	1	1	1	5	1	1	0	0	1	1	1	5	1	1	0	0	0	2
1	2	3	1	1	1	1	1	0	1	1	0	1	1	1	1	0	0	0	0	0	4	3	0	1	1	1	1	1	5	1	1	1	1	1	5	1	1	0	0	1	1	0	4	1	0	0	0	0	2
1	2	3	1	1	1	1	1	0	1	1	0	1	1	1	1	0	0	0	0	0	4	3	0	1	1	1	1	1	5	1	1	1	1	1	5	1	1	0	0	1	1	0	4	1	0	0	0	0	2
1	2	3	2	1	1	1	1	0	0	0	1	1	1	1	1	1	0	0	1	0	6	3	0	1	1	0	1	1	4	1	0	1	1	1	4	1	1	0	0	1	1	1	5	1	0	1	0	0	2
1	5	3	1	1	0	1	1	0	1	0	0	1	1	1	1	1	1	0	0	1	7	3	0	1	1	1	1	1	5	1	1	1	1	1	5	1	1	0	1	0	1	0	4	1	1	0	0	0	1
1	2	3	2	2	1	1	1	0	1	1	1	1	1	0	1	1	1	0	1	0	6	3	0	1	1	1	1	1	5	1	0	0	1	1	3	1	1	1	0	1	1	0	5	1	1	0	0	0	2
1	1	3	2	1	0	0	0	0	0	0	1	1	1	1	1	1	0	1	1	1	8	0	0	0	0	1	1	1	3	1	1	1	1	1	5	1	1	0	0	1	1	1	5	1	1	0	0	0	6
1	5	2	1	1	0	1	0	0	1	1	1	1	1	0	1	0	1	1	1	1	7	5	0	1	1	1	1	1	5	1	0	1	1	1	4	0	1	1	1	0	1	0	4	1	1	0	0	0	2
1	2	2	1	2	1	0	0	0	0	0	0	1	0	0	1	1	1	0	1	1	6	3	0	1	1	1	1	1	5	1	0	0	1	1	3	1	1	0	0	0	0	1	3	1	1	1	0	0	3
0	2	3	1	1	0	0	0	0	1	0	1	1	1	1	1	1	1	1	1	1	9	0	0	1	1	0	1	1	4	1	1	0	1	1	4	1	1	0	0	1	1	1	5	1	1	0	0	0	1
1	2	3	1	1	1	1	1	0	0	0	1	1	1	0	1	1	0	0	0	1	5	3	0	1	1	1	1	1	5	0	1	0	1	1	3	0	1	0	0	0	1	0	2	1	1	1	0	0	3
1	3	2	1	1	1	1	0	0	0	1	1	1	1	1	1	0	0	0	0	1	5	8	0	1	1	1	1	1	5	1	1	1	1	1	5	1	1	0	0	1	0	1	4	1	1	0	0	0	4
0	2	3	2	2	1	0	0	0	0	0	1	1	1	1	1	0	0	0	1	1	6	3	0	1	1	1	1	1	5	0	1	0	1	1	3	1	1	1	1	1	1	1	7	1	0	1	0	0	1
1	2	3	2	2	1	0	1	0	0	1	0	1	1	1	1	0	0	0	0	0	4	1	1	1	1	1	1	1	6	0	1	1	1	1	4	0	0	0	0	1	1	0	2	0	0	1	0	0	2
1	1	3	0	2	0	0	0	0	0	0	1	1	1	0	1	0	1	0	1	0	5	0	0	1	1	0	1	1	4	0	1	1	1	1	4	0	0	0	0	1	1	0	2	0	1	0	0	0	2
1	3	2	2	2	1	1	1	1	1	1	1	1	1	1	1	1	1	1	1	1	9	0	0	0	0	1	1	1	3	1	0	0	1	1	3	0	0	0	0	1	1	1	3	1	1	0	0	0	1
1	2	3	2	2	1	1	1	0	1	0	0	1	0	1	0	0	0	1	0	0	3	0	0	1	1	1	1	1	5	1	1	1	1	1	5	1	1	0	0	1	1	1	5	1	0	0	0	0	5
1	5	3	2	0	1	1	0	0	0	0	1	1	1	1	1	0	1	0	1	1	7	3	0	1	1	0	0	1	3	0	1	0	1	1	3	1	1	0	1	0	1	0	4	0	0	1	0	0	1
1	3	3	2	2	0	0	0	0	1	0	1	1	1	0	1	1	0	1	1	0	6	3	0	1	1	1	1	1	5	1	1	1	1	1	5	1	1	0	1	0	1	0	4	1	1	1	0	0	2
1	1	3	2	2	1	0	1	0	0	1	1	0	0	0	1	1	0	0	0	0	2	3	1	1	1	1	1	1	6	1	1	1	1	1	5	0	1	1	0	0	1	0	3	1	1	1	0	0	2
0	2	3	2	2	1	1	1	0	1	1	1	1	1	1	1	1	1	1	1	1	9	3	0	1	1	1	1	1	5	1	0	0	1	1	3	1	1	0	0	0	1	0	3	1	0	1	0	0	2
1	4	3	2	1	1	1	0	0	1	0	1	1	1	1	1	0	0	0	0	1	5	0	0	1	1	1	1	1	5	1	1	1	1	1	5	1	1	0	0	1	1	0	4	0	0	0	0	1	4
0	2	3	1	2	0	0	0	0	1	0	0	1	1	0	1	1	0	0	1	1	6	3	0	1	1	1	1	1	5	1	0	0	1	1	3	0	1	0	0	0	1	0	2	1	0	1	0	0	1
1	2	3	2	1	1	0	0	0	0	0	0	1	1	0	1	0	0	0	0	0	3	0	0	1	1	1	1	1	5	1	0	1	1	1	4	1	0	0	0	1	1	0	3	1	0	1	0	0	3
1	3	3	1	1	1	0	0	0	0	0	0	1	1	1	1	1	1	0	1	0	7	3	1	1	1	1	1	1	6	1	1	0	1	1	4	0	1	1	0	1	1	1	5	1	1	0	0	0	1
0	2	3	2	2	1	1	0	0	0	0	1	1	1	0	1	1	1	0	1	1	7	3	1	1	1	1	1	1	6	1	1	0	1	1	4	1	1	0	0	1	1	0	4	1	1	1	0	0	4
1	2	3	1	2	1	1	0	0	1	1	1	1	1	1	1	1	1	0	0	0	6	1	0	1	1	1	1	1	5	1	1	1	1	1	5	1	0	1	0	0	1	0	3	1	0	0	0	0	1
0	1	3	0	2	0	0	0	1	0	0	0	1	0	1	0	0	0	0	0	0	2	3	1	1	1	1	1	1	6	1	1	1	1	1	5	1	1	0	0	1	1	1	5	1	0	0	0	0	1
1	3	3	2	0	0	0	1	0	0	0	0	1	1	0	1	1	1	1	1	0	7	3	0	1	1	1	1	1	5	1	0	0	1	0	2	1	1	0	0	1	1	1	5	1	1	1	0	0	1
1	2	3	1	1	1	1	0	0	0	0	0	1	1	0	1	0	0	0	1	0	4	3	0	1	1	1	1	0	4	1	1	0	1	1	4	1	1	0	1	1	1	1	6	1	0	0	0	0	1
1	3	3	2	2	1	1	0	0	0	1	0	1	1	0	1	0	1	0	1	0	5	3	0	1	0	1	1	0	3	1	1	0	1	1	4	0	1	0	1	0	1	0	3	1	1	0	0	0	1
1	4	3	1	1	1	0	1	0	1	0	0	1	1	0	1	0	0	0	0	0	3	3	0	1	1	1	1	1	5	1	0	0	1	1	3	1	0	1	0	1	1	1	5	1	0	1	0	0	2
1	2	3	1	1	1	0	0	0	0	0	0	1	0	1	0	0	0	0	0	0	2	0	0	1	1	1	1	0	4	0	1	1	1	1	4	0	1	0	0	1	1	0	3	1	0	0	0	0	1
1	4	3	2	1	1	1	0	1	1	1	1	1	1	1	1	1	1	0	1	1	8	3	0	1	1	1	1	1	5	1	1	1	1	1	5	1	1	1	1	1	1	0	6	1	0	1	0	0	0
1	3	3	1	1	0	0	1	0	0	0	0	1	1	1	1	1	0	0	1	1	7	3	1	1	1	1	1	1	6	1	1	1	1	1	5	1	1	0	0	1	1	1	5	1	0	1	0	0	1
1	3	3	1	1	1	1	1	1	1	0	1	1	1	0	1	1	1	0	0	1	6	0	0	1	1	1	1	1	5	1	0	0	1	1	3	1	1	0	0	1	1	1	5	1	1	0	0	0	2
1	2	3	2	1	1	1	1	1	1	0	1	1	1	0	1	1	1	0	0	1	6	3	0	1	1	1	1	1	5	1	0	1	1	1	4	1	1	0	1	0	1	0	4	1	0	0	0	0	2
1	4	2	1	1	1	0	1	0	1	1	1	1	0	0	0	1	0	0	0	1	3	2	0	1	1	1	1	1	5	1	1	1	1	1	5	0	0	0	0	0	1	0	1	0	0	1	0	0	2
1	3	3	1	1	1	1	1	0	1	1	1	1	0	0	1	1	0	0	1	1	5	3	0	1	1	1	1	1	5	1	1	0	1	1	4	0	1	1	0	0	0	0	2	1	0	1	0	0	1
0	2	3	1	1	1	1	0	0	0	1	1	1	1	1	1	0	0	0	1	0	5	0	0	1	1	0	1	1	4	1	1	1	0	1	4	0	1	0	0	0	1	1	3	1	1	0	0	0	2
1	2	3	1	1	1	1	1	0	0	0	0	1	1	0	1	0	0	1	0	0	4	3	0	1	1	1	1	1	5	1	1	1	1	1	5	1	1	0	0	1	1	1	5	1	0	0	0	0	0
0	2	3	1	1	1	0	1	0	1	0	0	1	1	0	1	1	1	0	1	0	6	3	0	1	1	0	1	1	4	1	1	1	1	1	5	0	1	0	0	1	0	0	2	1	1	1	0	0	2
1	1	3	1	1	1	0	0	0	0	0	0	1	1	0	1	0	0	0	1	0	4	3	0	1	1	1	1	1	5	1	1	1	1	1	5	1	1	0	0	1	1	0	4	1	0	0	0	0	1
1	1	3	1	1	1	0	0	0	0	0	0	1	1	0	1	0	0	0	1	0	4	3	0	1	1	1	1	1	5	1	1	1	1	1	5	1	1	0	0	1	1	0	4	1	0	0	0	0	1
1	5	3	1	1	1	1	1	0	1	0	0	1	1	0	1	0	1	0	1	1	6	3	0	0	1	1	1	1	4	0	1	1	1	1	4	0	1	0	0	0	1	0	2	1	1	0	0	0	2
1	5	3	1	1	1	1	1	0	1	0	0	1	1	0	1	0	1	0	1	1	6	3	0	0	1	1	1	1	4	0	1	1	1	1	4	0	1	0	0	0	1	0	2	1	1	0	0	0	2
1	2	3	2	0	1	0	0	0	0	0	0	1	0	0	0	0	0	0	0	0	1	3	1	1	1	1	1	0	5	1	0	0	0	0	1	0	1	0	1	1	1	1	5	1	0	0	0	0	3
1	2	3	2	0	1	0	0	0	0	0	0	0	0	1	0	0	0	0	0	0	1	3	0	0	0	1	1	1	3	0	0	0	1	0	1	1	1	0	0	1	1	1	5	0	1	0	0	0	3
0	1	3	1	1	1	0	1	0	1	1	1	1	1	1	1	1	0	0	1	0	6	0	1	1	1	1	1	0	5	1	1	1	1	1	5	1	1	1	0	1	1	1	6	1	1	0	0	0	1
0	2	3	1	2	1	1	0	0	1	1	1	1	1	1	1	1	1	0	1	1	8	3	1	1	1	0	0	1	4	1	1	1	1	1	5	1	0	0	0	0	1	0	2	1	1	1	0	0	1
1	3	3	0	2	0	0	0	0	1	0	1	0	0	0	1	0	1	0	1	1	4	8	0	0	1	1	1	1	4	0	1	0	1	1	3	0	1	0	1	1	1	0	4	1	0	1	0	0	6
1	4	3	2	1	1	1	1	0	1	0	1	1	1	0	1	1	1	0	0	0	5	3	0	1	1	1	1	0	4	1	0	1	1	1	4	1	1	1	0	0	1	0	4	1	1	1	0	0	1
1	1	2	2	0	1	1	1	0	0	0	0	1	0	0	0	0	0	0	0	0	1	0	0	1	0	1	1	0	3	1	1	0	0	0	2	1	1	0	0	1	1	1	5	0	0	1	0	0	2
1	2	3	1	2	1	0	0	0	0	0	1	1	1	0	1	1	0	0	1	0	5	3	0	1	1	1	1	1	5	1	1	0	1	1	4	0	1	0	0	0	1	0	2	1	0	0	0	0	4
1	2	3	2	1	0	1	1	1	0	0	0	1	1	0	1	0	0	0	1	1	5	3	0	1	1	1	1	1	5	0	1	0	1	1	3	1	1	0	0	1	1	1	5	1	1	0	0	0	3
1	3	3	2	2	1	1	0	0	0	1	0	1	1	1	1	1	1	1	1	1	9	0	0	0	1	1	0	1	3	1	1	1	1	1	5	1	1	0	0	0	1	0	3	1	0	0	0	0	5
0	2	3	1	1	0	0	0	0	1	0	1	1	0	0	1	1	0	0	1	0	4	0	0	1	0	1	1	1	4	1	0	1	1	1	4	0	1	1	1	1	1	1	6	0	0	0	0	1	1
1	3	3	1	1	1	1	1	0	0	0	1	1	1	0	1	1	1	0	1	0	6	3	0	1	1	1	1	1	5	1	0	0	1	1	3	1	1	0	1	0	1	1	5	1	1	0	0	0	1
1	1	3	2	1	0	1	1	0	1	0	1	1	1	0	1	0	0	0	1	1	5	3	0	1	1	1	0	1	4	1	1	1	1	1	5	1	1	0	0	1	1	1	5	1	1	0	0	0	1
0	4	3	1	1	0	1	1	1	1	1	1	1	1	1	1	1	1	1	0	1	8	3	1	1	1	0	1	1	5	1	1	1	1	1	5	1	1	1	1	1	1	0	6	1	1	0	0	0	1
1	2	3	1	1	1	0	0	0	0	0	0	0	1	0	1	0	0	0	0	0	2	3	0	0	1	1	1	1	4	0	1	0	1	0	2	1	1	0	0	1	1	1	5	1	0	0	0	0	0
1	3	3	1	1	0	1	0	1	1	0	1	1	1	0	1	1	1	0	0	0	5	3	1	1	1	1	1	1	6	1	0	1	1	1	4	1	1	1	1	1	1	1	7	1	0	0	0	0	1
1	2	3	1	1	1	1	1	0	0	1	1	1	1	1	1	1	1	1	1	1	9	3	0	1	1	1	1	1	5	1	1	1	1	1	5	1	1	1	1	1	1	0	6	1	1	1	0	0	1
1	1	3	2	2	1	1	0	1	1	0	0	1	1	0	1	1	0	0	1	1	6	3	1	1	1	1	1	1	6	1	1	1	1	1	5	1	1	0	0	1	1	1	5	1	1	0	0	0	1
1	3	3	1	1	1	1	0	0	0	0	1	1	1	0	1	0	0	0	0	1	4	0	0	1	1	1	1	1	5	1	1	1	1	1	5	1	0	0	0	1	1	1	4	1	1	0	0	0	2
1	2	3	1	1	0	0	0	0	1	0	0	1	0	0	1	1	1	0	0	1	5	3	0	1	1	1	0	1	4	1	0	0	1	1	3	1	1	0	0	0	1	1	4	1	1	0	0	0	2
0	1	3	2	2	1	0	1	0	0	0	0	1	1	1	1	1	0	0	1	1	7	3	1	1	1	1	1	1	6	1	1	1	1	1	5	1	1	0	0	0	1	0	3	1	0	0	0	0	1
1	2	3	1	1	1	0	0	0	0	0	0	1	0	0	0	0	0	0	0	0	1	3	0	0	1	1	1	1	4	1	1	0	1	1	4	1	1	0	0	1	1	1	5	0	0	1	0	0	1
1	2	2	2	2	1	0	1	0	0	1	0	1	1	1	1	1	1	1	1	1	9	3	0	1	1	1	1	1	5	1	1	1	1	1	5	1	1	0	0	1	1	1	5	1	0	0	0	0	1
0	1	2	1	1	1	0	0	0	0	0	0	1	0	0	1	0	0	0	0	1	3	8	0	0	0	1	1	1	3	1	0	1	1	1	4	1	1	0	0	1	1	1	5	0	0	1	0	0	1
1	2	3	1	1	0	0	0	0	1	0	1	1	0	0	1	1	1	0	1	1	6	3	0	1	1	1	1	1	5	1	1	1	1	1	5	1	1	0	1	1	1	1	6	1	0	0	0	0	1
1	2	3	1	1	1	1	1	0	1	1	1	1	1	0	0	0	0	0	0	1	3	0	0	1	1	1	1	1	5	1	1	0	1	1	4	0	0	1	1	0	0	0	2	0	1	0	0	0	0
0	3	3	2	1	1	1	1	1	1	1	1	1	1	1	1	1	1	0	1	1	8	3	0	1	1	0	0	1	3	1	1	1	1	1	5	0	1	1	1	0	1	1	5	1	1	0	1	0	3
0	3	1	2	2	0	0	0	0	0	0	1	1	0	0	1	0	1	1	0	1	5	8	1	1	1	0	0	1	4	1	1	1	1	1	5	0	0	0	0	1	1	0	2	1	1	1	0	0	6
0	2	3	1	1	1	1	0	0	0	0	1	1	1	0	1	0	1	0	0	1	5	1	0	0	1	1	1	1	4	1	1	1	1	1	5	1	0	0	0	1	1	0	3	1	0	0	0	0	2
1	3	3	1	1	0	0	0	0	1	0	1	1	1	0	1	1	1	0	0	0	5	3	0	1	1	1	1	1	5	1	1	0	1	1	4	0	0	1	0	0	1	1	3	1	1	0	0	0	1
1	2	3	1	1	1	1	0	1	0	0	1	1	1	0	1	1	0	0	0	0	4	3	0	1	1	0	1	1	4	1	0	1	1	1	4	1	1	0	0	1	1	1	5	1	0	0	0	0	1
1	2	3	2	0	1	1	0	0	0	0	0	1	1	1	0	0	0	0	0	0	3	0	0	0	1	1	1	0	3	1	1	1	1	1	5	1	1	0	0	1	1	0	4	1	0	0	0	0	7
1	2	3	1	1	0	0	0	0	1	0	1	1	1	1	1	1	0	0	1	1	7	3	0	1	1	1	0	1	4	1	1	1	1	1	5	0	1	0	0	0	1	0	2	1	0	0	0	0	1
1	2	3	1	1	1	0	0	0	1	0	1	1	1	0	1	1	0	0	1	0	5	0	0	1	1	0	1	1	4	1	1	1	1	1	5	1	1	0	0	1	1	1	5	1	0	0	0	0	1
1	2	3	1	1	0	0	1	0	0	0	0	0	1	0	0	0	0	0	0	0	1	0	0	0	0	1	1	1	3	0	1	0	0	0	1	1	0	0	0	1	1	1	4	0	0	1	0	0	0
1	4	3	0	1	0	0	0	0	1	0	1	1	1	0	1	1	0	0	1	0	5	0	1	1	1	1	1	1	6	1	1	0	0	1	3	1	1	1	1	1	1	0	6	0	0	0	0	1	1
0	2	3	1	1	0	0	0	0	0	0	1	1	1	0	1	1	0	0	0	0	4	0	0	1	1	0	1	1	4	1	1	1	1	1	5	0	0	0	0	1	1	1	3	1	1	1	0	0	2
0	2	2	2	2	1	1	0	0	0	0	0	1	0	0	1	0	0	0	0	1	3	0	0	0	1	1	1	1	4	1	1	0	1	1	4	1	1	0	0	1	1	1	5	0	1	0	0	1	2
0	2	3	1	1	0	0	0	0	1	0	1	1	0	1	1	1	0	1	1	1	7	0	0	1	1	0	1	1	4	1	1	1	1	1	5	1	1	0	0	1	1	0	4	1	1	0	0	0	3
1	2	2	1	1	0	1	1	1	1	0	0	1	1	1	1	1	1	0	1	0	7	5	0	1	1	0	1	1	4	1	1	1	1	1	5	0	0	0	0	1	0	0	1	1	0	1	0	0	4
1	3	3	2	2	1	0	0	0	0	0	0	1	1	0	1	0	0	0	0	0	3	0	0	1	1	1	1	1	5	1	0	0	1	1	3	1	1	0	0	1	1	1	5	0	0	0	0	1	2
1	2	3	1	1	1	0	1	1	0	0	0	1	1	1	1	1	1	1	1	1	9	0	1	1	1	1	1	1	6	1	1	1	1	1	5	1	1	0	0	1	1	1	5	1	1	0	0	0	3
0	2	2	2	2	1	1	1	0	1	1	1	1	1	1	1	1	1	1	1	1	9	0	0	1	1	1	1	1	5	1	1	1	1	1	5	1	1	0	0	0	1	0	3	1	0	0	0	0	6
1	4	3	1	2	1	0	0	0	0	0	0	1	1	1	1	0	1	0	1	1	7	8	0	1	1	1	1	1	5	1	0	0	1	0	2	0	1	0	0	0	1	0	2	1	1	0	0	0	3
1	3	3	1	1	1	1	1	0	1	0	1	1	1	0	1	1	1	0	0	0	5	3	0	1	1	1	1	1	5	1	0	0	1	1	3	1	1	0	0	1	1	0	4	1	1	0	0	0	1
1	3	3	2	2	1	1	1	1	1	0	1	1	1	1	1	1	1	1	1	1	9	3	0	1	1	1	1	1	5	1	1	0	0	1	3	1	1	0	0	1	1	0	4	1	0	0	0	0	2
1	2	2	2	1	0	0	0	0	1	0	0	1	0	0	1	0	0	0	1	0	3	3	0	1	1	1	1	1	5	1	0	1	1	1	4	1	1	0	0	1	1	1	5	1	0	0	0	0	4
1	4	3	2	2	0	1	1	1	0	0	0	1	1	0	1	0	1	0	0	1	5	3	0	1	1	1	1	1	5	0	0	1	1	1	3	1	0	0	0	1	1	1	4	1	0	0	0	0	3
1	3	3	1	1	0	1	0	0	0	0	1	1	1	1	1	1	1	1	0	1	8	3	0	1	1	1	1	1	5	1	1	1	1	1	5	0	1	0	1	0	1	0	3	1	1	1	0	0	2
1	2	3	1	1	1	0	0	0	0	0	0	1	1	0	0	1	0	0	0	1	4	0	0	1	0	1	1	1	4	1	0	1	1	1	4	1	1	0	0	1	1	1	5	0	1	1	0	0	2
1	2	2	2	1	0	0	1	0	0	0	1	1	1	0	1	1	0	0	0	1	5	0	0	1	1	1	1	1	5	1	0	1	1	1	4	0	1	0	0	0	1	0	2	1	0	1	0	0	5
0	0	2	1	1	1	0	0	0	0	0	0	1	0	0	1	1	0	0	0	0	3	3	0	0	1	1	1	1	4	1	1	1	1	1	5	1	1	0	0	1	1	1	5	1	0	0	0	0	4
1	1	3	2	2	1	1	1	1	1	1	1	1	1	0	1	1	1	0	0	0	5	3	0	1	1	1	1	1	5	1	0	0	1	0	2	1	1	0	0	1	0	1	4	0	1	0	0	0	2
1	3	3	1	1	1	0	0	0	0	0	0	1	0	0	0	0	0	0	0	0	1	0	0	1	0	1	1	0	3	0	0	0	1	0	1	1	1	0	0	1	1	1	5	1	0	0	0	0	7
1	0	2	2	1	0	1	1	0	0	0	1	1	1	0	1	1	0	1	1	1	7	3	1	1	1	1	1	1	6	1	0	1	1	1	4	1	1	0	0	1	1	1	5	1	1	1	0	0	1
0	3	3	0	0	1	0	1	0	1	0	1	1	1	0	1	0	1	1	0	1	6	1	1	1	1	0	1	1	5	1	1	1	1	1	5	1	1	0	0	1	0	0	3	1	0	1	0	0	4
0	5	2	1	2	1	1	1	1	0	0	0	1	1	0	1	1	1	1	1	1	8	3	1	1	1	1	0	1	5	1	1	1	1	1	5	0	1	0	1	0	1	0	3	1	0	0	0	0	1
1	4	2	1	2	1	0	0	0	0	0	0	1	1	0	1	1	1	0	1	0	6	3	0	1	1	1	1	1	5	1	1	0	1	1	4	0	1	0	1	0	1	0	3	1	0	0	0	0	2
1	3	2	1	1	1	1	1	0	1	0	1	1	1	1	1	1	1	1	1	1	9	0	0	1	1	1	1	0	4	1	0	0	1	1	3	1	1	0	0	0	1	1	4	1	0	0	0	1	1
0	2	3	1	1	1	0	0	0	0	0	0	1	0	0	0	0	0	0	0	0	1	0	0	0	0	0	1	0	1	1	0	0	0	0	1	0	0	0	0	0	1	1	2	1	0	1	0	0	5
1	2	3	0	0	1	1	1	0	0	0	0	1	1	0	1	1	0	0	1	0	5	3	0	1	1	1	1	1	5	1	1	1	1	1	5	1	1	1	1	0	1	1	6	1	0	1	0	1	6
0	1	2	1	1	1	0	0	0	0	0	1	1	0	0	1	1	1	0	1	0	5	3	1	1	1	0	1	1	5	1	1	1	1	1	5	1	1	0	0	1	1	1	5	1	1	0	0	0	2
1	5	2	2	1	1	1	1	0	0	0	0	1	0	1	1	0	1	0	1	1	6	3	0	1	1	1	1	1	5	1	1	1	1	1	5	1	1	0	0	0	1	0	3	1	0	0	0	0	1
1	2	3	1	1	1	1	0	0	0	1	0	1	0	0	1	1	0	0	0	0	3	0	0	1	1	1	1	1	5	1	1	0	1	1	4	1	1	0	0	1	1	1	5	1	0	0	0	0	6
1	3	3	2	1	0	1	0	0	0	0	0	1	0	0	0	0	0	0	0	0	1	3	0	0	1	1	1	0	3	0	0	0	1	0	1	0	1	0	0	1	1	0	3	1	0	0	0	0	1
1	2	3	2	1	1	1	1	0	1	0	1	1	1	1	1	1	1	0	1	0	7	3	0	1	1	1	1	1	5	1	0	1	1	1	4	1	1	1	1	1	1	0	6	1	1	0	0	0	1
1	5	2	1	1	1	0	0	0	0	0	0	1	1	1	1	0	0	0	1	0	5	0	0	0	1	1	1	0	3	1	0	1	1	1	4	0	0	1	0	1	1	0	3	0	0	1	0	0	3
1	2	2	1	1	0	0	0	0	1	0	1	1	1	0	1	0	1	0	0	0	4	3	0	1	1	1	1	1	5	1	1	0	1	1	4	1	1	0	0	1	1	0	4	1	0	0	0	0	7
1	2	3	2	1	1	0	0	1	1	0	0	1	1	0	1	1	1	0	1	1	7	3	0	1	1	0	1	1	4	1	1	0	1	1	4	1	1	1	0	1	1	0	5	1	1	0	0	0	1
0	5	3	1	1	1	0	1	0	0	0	1	1	1	1	1	1	1	0	1	1	8	3	0	1	1	1	1	1	5	1	1	0	1	1	4	0	1	0	1	0	1	0	3	1	0	1	0	0	1
0	5	3	1	1	1	0	0	0	0	0	0	1	1	1	1	0	0	0	0	1	5	3	0	1	0	1	1	0	3	0	1	0	0	0	1	0	1	0	0	0	1	0	2	1	1	0	0	0	2
1	3	3	1	2	1	1	1	0	0	0	0	1	1	0	0	0	0	0	0	0	2	0	0	1	0	1	1	0	3	1	0	0	0	0	1	0	1	0	1	1	1	1	5	0	1	0	0	0	5
1	3	3	1	2	1	1	1	0	0	0	0	1	1	0	0	0	0	0	0	0	2	0	0	1	0	1	1	0	3	1	0	0	0	0	1	0	1	0	1	1	1	1	5	0	1	0	0	0	5
1	2	3	1	1	0	0	0	0	0	0	1	1	1	1	0	0	0	0	1	1	5	2	0	1	1	1	1	1	5	1	1	0	1	1	4	0	1	1	1	0	1	0	4	1	1	0	0	0	1
1	4	3	2	2	1	1	1	0	0	1	0	1	1	1	1	0	1	0	0	0	5	2	0	1	1	1	1	1	5	1	0	0	1	1	3	1	1	0	0	0	1	0	3	1	0	0	0	1	1
1	4	3	2	1	1	0	0	0	1	0	1	1	1	0	0	1	1	0	1	0	5	0	0	1	1	1	1	1	5	1	0	1	1	1	4	1	1	0	1	1	1	0	5	1	0	0	0	1	1
1	4	3	2	1	1	0	0	0	1	0	1	1	1	0	0	1	1	0	1	0	5	0	0	1	1	1	1	1	5	1	0	1	1	1	4	1	1	0	1	1	1	0	5	1	0	0	0	1	1
1	2	3	1	1	1	1	1	0	1	1	1	1	1	0	1	1	1	1	1	1	8	5	0	1	1	1	1	1	5	1	1	1	1	1	5	1	1	0	0	0	1	0	3	0	1	0	0	0	1
1	3	3	2	2	1	0	0	0	1	0	1	1	1	0	1	0	1	1	0	0	5	3	0	1	1	1	1	1	5	1	0	0	1	1	3	1	1	0	0	1	1	1	5	1	1	0	0	0	2
0	2	3	1	1	0	0	0	0	1	0	1	1	1	1	1	0	0	0	1	1	6	3	0	1	1	1	1	1	5	1	1	0	1	1	4	1	1	1	1	1	1	1	7	1	1	0	0	0	1
1	3	3	2	1	1	1	1	0	0	0	1	1	1	1	1	1	1	1	1	1	9	3	1	0	1	1	1	1	5	1	1	1	1	1	5	1	1	0	1	0	1	1	5	1	1	0	0	0	7
1	2	3	1	1	0	0	0	0	0	0	1	1	1	0	1	1	0	0	1	0	5	3	0	1	1	1	1	1	5	1	0	0	1	1	3	1	1	1	1	0	1	1	6	1	1	0	0	0	1
1	2	3	1	1	0	0	0	0	0	0	1	1	1	0	1	1	1	0	0	1	6	3	0	1	1	1	1	1	5	1	1	1	1	1	5	1	1	1	1	1	1	1	7	1	0	0	0	0	1
1	4	3	2	1	1	0	0	0	0	0	0	1	0	0	1	0	1	0	0	0	3	0	1	0	0	1	1	0	3	1	0	1	1	0	3	0	1	0	0	1	1	0	3	1	0	1	0	0	7
1	2	2	1	1	1	0	0	0	1	0	0	1	0	0	1	0	0	0	0	0	2	3	0	1	1	1	1	1	5	1	0	0	1	1	3	1	1	0	0	1	1	1	5	1	0	0	0	0	0
0	2	2	1	2	1	0	0	0	0	0	0	1	1	0	0	0	0	0	1	1	4	8	0	0	1	1	1	0	3	0	1	0	0	0	1	0	1	0	0	1	1	0	3	0	0	1	0	0	1
0	4	3	2	1	1	1	0	0	0	0	0	1	1	0	1	1	1	0	1	1	7	3	0	1	1	1	1	1	5	1	1	1	1	1	5	1	1	0	0	0	1	0	3	0	1	0	0	0	1
0	3	3	2	2	1	0	0	0	0	0	0	1	1	0	1	0	0	0	0	0	3	0	0	0	1	1	1	1	4	1	0	0	1	1	3	1	1	0	0	1	1	1	5	1	0	0	0	0	2
1	3	3	1	1	1	0	0	0	1	0	1	1	1	1	1	1	1	0	0	0	6	2	0	1	0	1	1	1	4	1	0	0	1	1	3	1	1	0	0	1	1	0	4	1	0	0	0	0	1
1	1	3	2	2	1	1	0	0	1	1	0	1	1	1	1	1	1	1	1	1	9	3	1	1	1	0	0	1	4	1	1	1	1	1	5	1	1	0	0	1	1	1	5	0	0	1	0	0	1
1	1	2	1	1	1	0	1	0	0	0	1	1	1	1	1	0	1	0	1	1	7	0	1	1	1	0	1	1	5	1	1	1	1	1	5	1	1	0	0	1	1	1	5	1	1	1	1	0	1
0	1	2	1	1	0	0	0	0	1	0	1	1	1	1	1	0	1	0	0	0	5	3	1	1	1	0	0	1	4	1	1	0	0	1	3	1	1	0	1	1	1	1	6	1	0	0	0	1	2
1	0	2	1	1	1	1	1	0	1	0	0	1	1	0	1	1	1	0	1	0	6	0	0	1	1	0	1	1	4	1	1	1	1	1	5	1	1	0	0	1	1	1	5	1	0	1	0	0	2
1	2	3	1	1	0	0	0	0	1	0	1	1	1	0	1	0	0	0	1	0	4	0	1	0	1	1	0	1	4	1	1	1	1	1	5	1	1	0	0	1	1	1	5	0	1	1	0	0	3
0	1	2	2	1	1	0	1	0	0	0	1	1	1	1	1	1	1	0	0	1	7	3	1	1	1	1	1	1	6	1	1	0	1	1	4	1	1	1	1	0	1	1	6	1	0	0	0	0	1
1	4	3	1	1	1	1	1	0	1	0	1	1	1	0	1	1	1	0	0	1	6	3	0	1	1	1	1	0	4	0	1	1	1	0	3	1	1	0	0	1	1	1	5	1	1	1	0	0	1
1	4	3	1	1	1	1	1	1	1	1	1	1	1	0	1	1	1	0	1	1	7	0	0	1	1	1	1	1	5	1	1	1	1	1	5	0	1	0	1	0	1	0	3	1	0	0	0	0	0
1	2	3	2	1	0	0	0	1	1	0	0	1	1	0	1	1	0	1	0	0	5	0	0	1	0	1	1	0	3	1	0	0	1	1	3	1	1	0	1	1	1	1	6	1	0	0	0	0	1
0	6	3	1	1	0	0	0	0	1	0	1	1	0	0	1	0	0	0	1	1	4	3	0	1	1	1	1	1	5	1	0	0	1	1	3	1	1	1	0	1	1	0	5	1	1	0	0	0	1
1	2	3	1	2	0	0	0	0	0	1	0	1	1	1	1	0	0	1	1	0	6	0	0	1	1	1	1	1	5	1	1	1	1	1	5	0	1	1	1	0	1	1	5	1	1	0	0	0	2
1	1	3	2	1	0	1	1	0	1	0	1	1	1	1	1	1	0	0	0	0	5	3	0	1	1	0	1	1	4	1	1	1	1	1	5	1	0	1	0	1	1	0	4	1	0	1	0	0	2
1	1	3	1	1	0	0	0	0	1	0	1	1	0	0	1	1	0	0	1	0	4	0	0	0	1	1	1	1	4	0	1	0	0	0	1	1	1	0	0	1	1	1	5	0	0	1	0	0	1
1	5	3	2	1	1	0	0	0	0	0	0	1	1	1	1	1	0	1	1	0	7	0	1	1	1	1	1	1	6	1	0	1	1	1	4	1	1	0	0	1	1	0	4	1	1	0	0	0	0
1	1	3	2	2	1	0	1	0	0	1	0	1	1	0	1	1	0	1	0	1	6	3	0	1	1	1	1	1	5	1	1	1	1	1	5	1	0	1	1	0	1	0	4	1	0	0	0	0	4
0	2	3	1	1	1	0	1	0	0	0	0	1	1	0	1	0	1	1	1	0	6	0	0	1	1	1	0	1	4	0	1	0	1	1	3	0	0	0	0	0	1	0	1	1	0	0	0	0	2
1	2	2	1	1	0	0	0	0	1	0	0	1	0	1	1	1	1	0	1	1	7	3	0	1	1	1	1	1	5	1	1	0	1	1	4	0	1	1	0	1	1	0	4	1	0	0	0	0	1
1	3	2	2	1	1	1	1	0	1	0	1	1	1	1	1	1	1	0	1	1	8	3	0	1	1	1	1	1	5	1	1	1	1	1	5	1	1	1	0	0	1	0	4	1	0	0	0	0	2
1	3	3	2	1	0	1	0	0	1	0	1	1	1	1	1	1	1	1	1	1	9	3	0	0	0	1	1	1	3	1	1	1	1	1	5	1	1	0	0	1	1	0	4	1	0	0	0	0	4
1	2	3	2	2	1	0	0	0	0	0	0	1	1	0	1	1	0	1	1	0	6	3	0	1	1	1	1	1	5	1	1	1	1	1	5	1	1	0	0	1	1	1	5	1	1	0	0	0	1
1	1	2	2	1	0	0	0	0	1	0	1	1	1	1	1	0	0	0	1	1	6	0	0	1	1	1	1	1	5	1	1	1	1	1	5	1	1	0	0	1	1	1	5	1	1	0	0	0	1
1	1	3	2	2	0	0	1	0	1	0	0	1	1	0	1	1	0	0	1	0	5	3	0	1	1	1	1	1	5	1	1	0	1	1	4	1	1	0	0	1	1	1	5	1	1	1	0	0	1
1	1	3	2	1	0	0	0	0	1	0	1	1	1	1	1	0	0	0	1	0	5	3	0	0	1	1	1	1	4	1	1	0	1	1	4	1	1	0	1	1	1	0	5	1	0	0	0	0	1
1	1	3	0	1	1	1	0	0	0	0	1	1	1	1	1	0	0	0	1	0	5	0	0	1	1	1	1	1	5	1	0	0	1	1	3	1	1	0	0	1	1	1	5	1	1	0	0	0	1
1	3	3	2	2	1	0	0	1	1	1	1	1	1	1	1	1	1	0	1	0	7	3	0	1	1	1	1	1	5	1	0	0	1	0	2	0	1	0	1	1	1	0	4	1	1	0	0	0	2
0	1	3	1	1	0	0	0	0	1	0	0	1	1	0	1	1	1	0	1	0	6	3	0	1	1	1	1	1	5	1	1	1	1	1	5	1	1	0	0	1	1	1	5	1	1	0	0	0	1
1	1	3	1	1	1	1	1	0	1	0	1	1	1	0	1	1	0	0	1	0	5	3	0	1	1	1	1	0	4	1	0	0	1	1	3	1	1	0	0	1	1	1	5	1	0	0	0	0	1
0	1	3	2	1	0	1	0	0	1	0	1	1	1	0	1	0	0	0	1	0	4	3	0	1	1	0	1	1	4	1	1	1	1	1	5	1	1	0	0	1	1	1	5	1	0	0	0	0	1
0	1	3	1	1	1	1	0	0	0	0	1	1	1	0	1	1	1	0	1	1	7	0	0	1	1	0	1	1	4	1	1	1	1	1	5	1	1	1	1	0	1	1	6	1	1	1	0	0	1
0	1	3	2	2	1	0	1	0	1	0	0	1	1	0	1	0	0	0	0	0	3	0	0	1	1	1	1	1	5	1	0	0	1	1	3	1	1	0	0	1	1	1	5	1	0	0	0	0	3
1	1	3	1	1	1	1	0	0	0	0	1	1	1	0	1	1	1	0	1	0	6	0	1	1	1	1	1	1	6	1	1	1	1	1	5	1	1	0	0	1	1	1	5	1	0	0	0	0	1
1	3	3	1	1	1	0	0	0	0	0	1	1	1	1	1	0	1	1	1	0	7	3	0	1	1	1	1	1	5	1	0	1	1	1	4	0	1	0	1	0	1	0	3	1	1	1	0	0	1
1	0	2	2	1	1	1	0	0	1	1	0	1	1	0	1	1	1	1	1	1	8	3	1	1	1	0	0	1	4	1	1	0	1	1	4	1	1	0	1	1	1	0	5	1	0	0	0	0	0
1	1	3	1	1	0	0	0	0	0	0	1	1	1	0	1	1	1	0	1	0	6	3	0	1	1	1	1	1	5	1	0	0	1	1	3	1	1	1	1	1	1	0	6	1	1	0	0	1	1
0	1	2	1	1	1	0	0	0	0	0	0	1	1	0	1	1	0	0	1	1	6	3	0	1	1	0	1	1	4	1	1	0	1	1	4	1	1	1	1	1	1	1	7	1	1	0	0	0	1
0	1	3	2	1	0	1	0	1	1	0	1	1	1	0	1	0	0	0	0	1	4	0	0	0	1	0	1	1	3	1	1	1	1	1	5	1	1	0	0	0	0	0	2	1	0	0	0	1	1
0	1	2	1	1	0	0	0	0	1	0	1	1	0	0	1	1	0	0	1	1	5	3	0	1	1	1	1	0	4	1	1	0	1	1	4	1	1	1	0	1	1	1	6	1	0	0	0	0	0
1	1	3	2	2	0	0	1	0	1	0	1	1	1	0	1	0	0	1	0	1	5	6	0	0	1	0	0	1	2	1	0	0	1	1	3	1	1	0	1	0	1	1	5	1	0	0	0	0	2
1	1	3	1	1	0	0	0	0	1	0	1	1	1	0	1	1	1	0	1	0	6	3	0	1	1	1	0	1	4	1	0	0	1	1	3	1	1	1	1	1	1	0	6	1	1	1	0	0	1
1	1	3	1	1	1	0	0	0	1	0	1	1	1	0	1	1	1	0	0	1	6	3	1	1	1	0	1	1	5	1	1	0	1	1	4	1	1	0	1	1	1	1	6	1	0	0	0	0	1
0	1	3	0	2	1	1	0	0	1	0	0	1	1	0	1	0	0	0	0	1	4	3	0	0	1	0	1	1	3	0	1	0	1	1	3	1	1	1	0	1	1	1	6	1	0	0	0	0	1
1	1	2	2	2	0	0	1	0	1	0	1	1	1	0	1	0	0	0	1	1	5	3	0	1	1	1	1	1	5	1	1	1	1	1	5	1	1	1	1	1	1	0	6	1	0	0	0	0	1
1	3	2	0	2	1	1	1	0	0	1	0	1	1	0	1	1	0	0	1	1	6	3	0	0	0	1	1	1	3	1	1	0	1	0	3	0	1	0	0	1	0	0	2	1	0	0	0	0	2
1	4	2	2	1	1	1	1	1	1	1	1	1	1	0	1	1	1	0	1	1	7	3	0	0	1	1	1	1	4	1	1	1	1	1	5	1	1	0	0	1	1	0	4	1	0	0	0	0	7
1	1	2	2	2	0	0	0	0	1	0	1	1	1	0	1	0	0	1	0	1	5	3	0	1	1	0	1	1	4	1	0	0	1	1	3	1	1	0	0	1	1	1	5	1	0	0	0	0	1
1	1	3	2	1	1	1	0	0	1	0	1	1	1	0	1	1	1	0	1	1	7	0	0	1	1	1	1	1	5	1	1	0	1	1	4	1	1	0	0	1	1	1	5	1	1	0	0	0	2
1	1	3	1	1	0	0	0	0	0	0	1	1	1	0	1	1	1	1	1	1	8	3	1	1	1	1	1	1	6	1	1	1	1	1	5	0	1	1	1	1	1	0	5	1	0	0	0	0	1
0	1	3	1	1	1	0	0	0	1	0	0	1	1	1	0	1	1	0	1	0	6	3	0	1	1	0	1	1	4	1	1	0	1	1	4	1	1	1	0	1	1	1	6	1	1	0	0	0	1
0	2	3	2	2	1	0	1	0	1	0	1	1	1	1	1	0	1	0	1	1	7	3	0	1	1	1	1	1	5	1	0	0	1	0	2	1	1	0	0	1	1	1	5	1	0	0	0	0	1
1	1	2	2	1	0	0	0	0	1	0	0	1	1	0	1	1	0	0	0	0	4	3	0	1	1	1	1	1	5	1	0	1	1	1	4	1	1	0	1	0	1	0	4	1	1	0	0	0	1
1	1	3	1	1	0	0	0	1	0	1	1	1	1	1	1	1	0	0	1	1	7	3	0	0	1	1	1	1	4	1	1	0	1	1	4	1	1	0	0	1	1	1	5	1	0	0	0	0	1
0	1	3	1	1	0	0	0	0	0	0	1	1	1	0	1	1	0	0	0	0	4	3	1	1	1	1	1	1	6	1	0	0	1	1	3	1	1	0	0	1	1	1	5	1	1	0	0	0	1
0	1	2	1	1	1	0	1	0	1	0	1	1	1	1	1	1	0	0	1	1	7	3	0	1	1	0	0	1	3	1	1	1	1	1	5	1	1	1	1	0	0	0	4	1	1	0	0	0	0
0	1	3	1	1	0	0	0	0	1	0	1	1	1	0	1	1	1	0	1	1	7	3	1	1	0	0	1	0	3	1	1	0	1	1	4	0	1	1	1	0	1	0	4	1	1	1	0	0	1
1	2	3	1	1	0	0	0	0	1	0	1	1	1	0	1	1	1	0	1	0	6	3	0	1	1	1	1	1	5	1	0	0	1	1	3	1	0	1	0	1	1	1	5	1	1	0	0	0	2
1	1	3	2	2	1	1	1	0	1	0	1	1	1	0	1	0	0	1	1	0	5	3	0	1	1	1	1	1	5	1	1	1	1	1	5	0	1	0	1	0	1	1	4	1	1	0	0	0	4
1	1	2	2	2	1	0	0	0	0	0	0	1	0	0	1	0	0	0	1	0	3	0	0	1	1	1	1	1	5	1	1	1	1	1	5	0	0	0	0	1	1	1	3	1	0	1	0	0	1
1	1	3	1	1	0	0	1	0	0	0	1	1	1	0	1	1	1	0	1	0	6	0	0	1	1	0	0	1	3	1	1	0	1	1	4	0	1	1	1	1	1	0	5	1	0	1	0	1	1
0	1	3	1	1	1	1	1	0	1	0	1	1	1	0	1	0	1	0	1	0	5	3	1	1	1	1	1	1	6	1	0	0	1	1	3	1	1	0	0	1	1	1	5	1	1	0	0	0	2
0	1	3	1	1	0	0	0	0	1	0	1	1	1	0	1	1	0	1	0	0	5	3	0	1	1	1	1	1	5	1	0	0	1	1	3	1	1	1	1	1	1	1	7	1	0	0	0	1	1
1	1	3	0	2	1	0	0	0	0	0	0	1	1	0	1	0	0	0	0	0	3	3	1	0	1	0	1	1	4	1	1	1	1	1	5	1	1	1	0	0	1	0	4	1	0	1	0	0	2
1	1	3	2	1	1	0	0	0	0	0	1	1	1	0	1	1	0	0	0	0	4	3	1	1	1	1	1	1	6	1	1	1	1	1	5	1	1	1	1	0	1	1	6	1	0	0	0	0	0
1	3	2	1	1	0	0	0	0	1	0	1	1	1	0	1	0	1	0	0	1	5	0	1	1	1	1	1	1	6	1	0	1	1	1	4	1	1	1	1	0	1	0	5	1	0	0	0	0	1
1	1	3	0	0	1	1	0	0	0	0	0	1	1	0	1	1	0	1	1	1	7	0	0	1	1	0	1	1	4	1	1	0	1	1	4	0	1	1	1	0	1	1	5	1	0	0	0	0	1
0	3	3	1	1	1	0	0	0	0	0	0	1	0	1	1	1	1	0	1	1	7	3	0	1	1	0	1	1	4	1	1	0	1	1	4	1	1	1	0	1	1	0	5	1	0	0	0	0	4
0	1	2	1	1	1	1	1	0	0	0	0	1	1	0	1	1	0	1	1	0	6	3	0	1	1	1	1	0	4	1	1	1	1	1	5	1	1	0	0	1	1	1	5	1	0	0	0	0	1
1	1	3	1	1	1	1	1	0	1	0	1	1	1	0	1	1	0	0	0	0	4	0	0	1	1	1	1	1	5	1	1	0	1	1	4	1	1	0	0	1	1	1	5	1	1	0	0	0	1
1	1	2	1	1	0	0	1	0	1	0	1	0	1	0	1	1	0	0	0	1	4	3	0	1	1	1	1	1	5	1	1	0	1	1	4	1	1	0	0	1	1	1	5	1	0	0	0	0	1
0	1	3	2	2	1	0	0	0	0	1	1	1	1	0	0	0	0	0	0	0	2	0	1	1	1	1	1	1	6	1	1	0	1	1	4	1	1	1	1	0	1	1	6	1	0	0	0	0	1
1	2	3	1	1	0	0	0	0	0	0	1	1	1	0	1	0	0	0	0	0	3	3	0	1	1	1	1	1	5	1	0	0	1	1	3	1	1	1	0	1	1	1	6	1	0	0	0	0	1
0	1	3	0	0	1	0	1	0	1	0	0	1	1	0	1	0	1	0	1	1	6	3	0	1	1	1	0	1	4	1	0	0	1	1	3	1	1	0	0	1	1	1	5	0	0	1	0	0	1
1	0	2	1	1	0	0	0	0	1	0	1	1	1	0	1	1	0	0	1	1	6	3	0	1	1	1	1	1	5	1	1	0	1	1	4	1	1	0	0	1	1	1	5	1	1	0	0	0	1
1	1	2	1	1	1	1	0	0	1	0	1	1	1	0	1	1	0	0	1	0	5	1	0	1	1	0	0	1	3	1	1	0	1	1	4	1	1	0	0	1	1	1	5	1	0	0	0	1	1
0	1	3	1	1	0	0	0	0	1	0	1	1	1	0	1	0	1	0	0	0	4	3	1	1	1	0	1	1	5	1	1	0	1	1	4	1	1	0	0	1	1	1	5	1	1	0	0	0	1
1	1	3	1	1	1	0	1	0	1	0	0	1	1	0	1	1	0	0	0	0	4	0	0	1	1	1	1	0	4	1	1	1	1	1	5	1	1	0	0	1	1	1	5	1	0	1	0	0	1
1	1	3	1	1	0	0	0	1	1	0	1	1	1	0	1	1	0	1	1	0	6	3	0	1	1	1	1	1	5	1	1	1	1	1	5	1	1	1	1	1	1	1	7	1	0	0	0	1	1
0	1	3	2	2	1	0	0	0	1	0	1	1	1	1	1	0	1	0	0	0	5	3	0	1	1	0	1	1	4	1	1	1	1	1	5	1	1	1	1	1	1	1	7	1	0	0	0	0	1
1	1	3	2	1	1	0	0	1	0	0	1	1	1	0	1	0	0	0	1	0	4	3	0	1	1	1	1	1	5	1	0	0	1	1	3	0	1	1	1	1	1	1	6	1	0	0	0	0	1
1	2	3	0	0	1	0	0	0	0	0	0	1	1	0	1	1	0	0	1	0	5	3	1	1	1	1	1	1	6	1	1	1	1	1	5	1	0	1	1	0	1	1	5	1	1	1	0	0	2
0	1	3	2	2	0	0	0	0	1	0	1	1	1	0	1	1	1	0	0	0	5	3	0	1	1	0	1	1	4	1	1	0	1	1	4	1	1	0	0	1	1	0	4	1	0	1	0	0	1
1	1	3	2	2	1	0	0	0	0	0	0	1	1	0	1	1	0	1	1	0	6	0	0	1	1	1	1	1	5	1	1	0	1	1	4	0	1	1	1	0	1	0	4	1	1	1	0	0	2
1	1	3	2	2	0	1	0	0	1	0	1	1	1	0	1	1	0	1	1	0	6	0	1	1	1	1	1	1	6	1	1	1	1	1	5	1	1	1	1	0	1	1	6	1	1	1	0	0	1
0	1	3	1	1	0	0	0	0	0	0	1	1	1	0	1	1	0	0	0	0	4	3	1	1	1	0	1	1	5	1	1	1	1	1	5	1	1	0	0	1	1	0	4	1	0	0	0	0	1
1	1	3	1	1	1	1	1	0	1	0	1	1	1	0	1	1	0	0	0	0	4	0	0	1	1	1	1	1	5	1	1	0	1	1	4	1	1	0	0	1	1	1	5	1	1	0	0	0	1
0	1	3	1	1	1	0	0	0	1	0	1	1	1	1	1	0	0	0	1	0	5	3	0	1	1	0	1	1	4	1	1	0	1	1	4	1	1	1	1	1	1	1	7	1	0	0	1	0	1
0	1	3	1	1	0	0	0	0	0	0	1	1	1	0	0	0	1	0	0	1	4	5	1	1	1	1	1	1	6	1	1	1	1	1	5	1	1	0	0	1	1	1	5	0	0	0	0	1	1
0	1	3	2	1	1	0	0	0	1	0	1	1	1	1	1	0	0	0	0	0	4	0	0	1	1	0	1	1	4	1	1	1	1	1	5	1	1	0	0	1	1	1	5	1	0	0	0	0	1
0	1	3	2	1	1	0	0	0	1	0	1	1	1	1	1	1	1	0	1	0	7	3	0	1	1	1	1	1	5	1	0	0	1	1	3	1	1	0	0	1	1	1	5	1	1	0	0	0	1
1	1	3	2	2	0	1	1	0	1	0	1	1	1	0	1	1	0	0	0	0	4	3	0	1	1	1	1	1	5	1	1	1	1	1	5	1	1	0	0	1	1	1	5	1	1	0	0	0	1
1	1	3	1	1	1	0	0	0	1	0	1	1	1	0	1	0	1	0	0	0	4	0	0	1	1	1	1	1	5	1	1	1	1	1	5	1	1	0	0	1	1	1	5	1	0	0	0	0	0
1	1	3	1	1	0	0	0	0	1	0	1	1	1	0	1	1	1	0	0	0	5	3	1	1	1	1	1	1	6	1	0	1	1	1	4	1	1	0	0	1	1	1	5	1	0	0	0	0	2
1	1	3	2	2	0	0	0	0	0	0	1	1	0	0	1	1	0	0	0	0	3	3	0	1	1	1	1	1	5	1	0	1	1	1	4	0	1	0	1	0	1	0	3	1	0	1	0	0	1
0	3	3	2	2	1	1	0	0	0	1	0	1	1	1	1	0	0	0	0	0	4	0	0	1	1	1	1	1	5	1	1	1	1	1	5	1	1	0	0	1	1	0	4	1	1	0	0	0	2
0	1	3	1	1	0	0	0	0	0	0	1	1	1	0	1	1	1	0	1	1	7	3	1	1	1	1	1	1	6	1	1	1	1	1	5	1	1	0	0	1	1	1	5	1	1	0	0	0	1
0	1	2	2	2	0	0	1	1	1	0	1	1	1	0	1	0	1	0	1	0	5	3	1	1	1	0	1	1	5	1	1	0	1	1	4	1	1	0	0	1	1	1	5	1	0	0	0	0	1
0	1	2	1	1	1	0	1	0	1	0	1	1	1	0	1	1	1	0	0	1	6	3	1	1	1	1	1	1	6	1	1	1	1	1	5	1	1	1	1	1	1	0	6	1	1	1	0	0	1
1	1	3	2	1	0	0	1	0	0	0	0	1	1	0	1	1	0	0	0	0	4	0	1	1	1	1	0	1	5	1	0	0	1	1	3	1	1	0	0	1	1	1	5	0	0	0	0	1	1
0	1	3	1	1	1	0	0	0	1	0	1	1	1	1	1	0	1	0	1	1	7	3	1	1	1	0	1	1	5	1	1	0	1	1	4	1	1	1	1	1	1	0	6	1	1	1	0	0	1
1	1	2	2	1	0	0	1	0	1	0	1	1	1	0	1	1	0	0	1	0	5	3	0	1	1	0	1	1	4	1	0	0	1	1	3	1	1	0	0	1	1	1	5	1	1	0	0	0	1
0	1	2	1	1	0	0	0	0	1	0	0	1	1	0	1	1	1	0	0	0	5	3	0	1	1	0	1	1	4	1	1	0	1	1	4	1	1	0	0	1	1	1	5	1	1	0	0	0	1
1	1	3	2	1	1	1	1	0	1	0	1	1	1	0	1	1	1	0	1	0	6	3	0	1	1	0	0	1	3	1	1	0	1	1	4	1	1	0	1	1	1	0	5	1	1	0	0	0	1
1	1	3	2	1	0	0	0	0	1	0	1	1	0	0	1	1	1	0	0	0	4	3	0	1	1	1	1	1	5	1	1	1	1	1	5	0	0	0	0	1	1	0	2	1	1	1	0	0	2
1	2	3	1	1	1	1	1	1	1	0	1	1	1	0	1	1	1	0	0	0	5	3	1	1	1	0	1	1	5	1	1	1	1	1	5	1	1	0	0	1	1	1	5	1	0	1	0	0	0
1	1	2	2	2	1	0	1	0	0	0	1	1	1	0	1	1	1	0	1	0	6	3	0	1	1	1	1	1	5	1	0	1	1	1	4	1	1	0	0	1	1	1	5	1	0	0	0	0	1
1	1	3	2	1	0	0	1	0	1	0	1	1	1	0	1	1	0	1	1	1	7	0	0	1	1	0	1	1	4	1	1	1	1	1	5	1	1	0	0	1	1	1	5	1	0	0	0	0	1
1	1	3	1	1	1	1	1	0	1	0	1	1	1	0	1	1	1	1	1	0	7	3	0	1	1	0	1	1	4	1	1	1	1	1	5	1	1	1	1	1	1	0	6	1	1	0	0	0	1
0	1	3	1	1	0	0	0	1	1	0	1	1	1	1	1	0	0	1	0	1	6	3	0	1	1	0	1	0	3	1	1	0	1	1	4	1	1	0	0	1	1	1	5	0	0	0	0	1	0
0	1	3	1	1	0	0	0	0	0	0	1	1	1	0	1	0	0	0	1	1	5	0	0	1	1	1	1	1	5	1	1	0	1	1	4	1	1	0	1	1	1	1	6	1	1	1	1	0	1
1	1	2	1	2	0	0	0	0	0	0	1	1	1	1	1	0	0	0	1	0	5	0	0	1	1	1	1	1	5	1	0	0	1	1	3	1	0	1	1	1	1	1	6	1	0	0	0	1	1
0	2	3	0	1	0	0	0	0	0	0	1	1	1	0	1	1	0	0	1	1	6	3	1	1	1	1	1	1	6	0	0	0	1	1	2	1	1	1	0	0	1	1	5	1	1	1	0	0	1
1	1	3	2	1	1	0	0	0	1	0	1	1	1	1	1	1	1	1	1	1	9	0	0	1	1	0	1	1	4	1	1	1	1	1	5	1	1	0	1	1	1	1	6	1	0	0	0	0	6
0	1	3	2	2	1	1	1	0	1	1	1	1	1	0	1	1	1	0	0	0	5	3	0	1	1	1	1	1	5	1	1	1	1	1	5	1	1	0	0	1	1	1	5	1	1	0	0	0	1
1	1	3	1	1	0	1	0	1	1	0	1	1	1	0	1	1	0	0	1	0	5	0	0	1	1	1	1	1	5	1	0	1	1	1	4	0	0	1	0	0	1	1	3	1	1	1	0	0	1
0	1	3	1	1	1	0	0	0	1	0	1	1	1	0	1	1	1	0	1	0	6	3	0	1	1	1	1	1	5	1	1	0	1	1	4	1	1	1	1	1	1	1	7	1	1	0	0	0	1
1	1	2	0	0	0	0	0	0	0	0	1	1	0	1	1	0	1	0	0	1	5	5	0	1	1	1	1	1	5	1	1	1	1	1	5	1	1	0	0	1	1	1	5	1	0	0	0	0	1
1	2	3	2	1	0	0	1	0	1	0	1	1	1	0	1	1	1	0	1	0	6	3	1	1	1	1	0	1	5	1	1	0	1	1	4	1	1	0	0	1	1	1	5	1	1	1	0	0	1
0	6	3	1	1	1	0	1	0	0	1	0	1	1	1	1	1	1	1	1	1	9	0	1	1	1	1	1	1	6	1	1	1	1	1	5	1	1	0	0	1	1	0	4	1	0	0	0	1	1
1	2	3	1	1	1	0	0	0	0	0	1	1	0	0	1	0	1	0	1	1	5	0	0	0	1	1	1	1	4	1	0	0	1	0	2	1	1	0	0	1	1	0	4	1	0	0	0	0	2
1	1	3	1	1	1	0	0	0	0	0	1	1	1	1	1	1	1	1	1	1	9	3	1	1	1	0	0	1	4	1	1	1	1	1	5	1	1	1	1	0	0	0	4	1	1	1	0	0	1
0	1	3	2	2	0	1	1	0	1	0	1	1	1	0	1	1	0	1	0	1	6	3	0	1	1	0	1	1	4	1	1	1	1	1	5	1	1	1	0	1	1	0	5	1	1	1	0	0	1
1	1	3	2	1	0	0	0	1	0	0	1	1	1	1	0	0	0	0	1	1	5	0	1	1	1	1	0	1	5	1	0	1	1	1	4	1	1	0	0	1	1	0	4	1	0	0	0	0	1
1	3	3	1	1	0	1	1	0	1	0	1	1	1	0	1	1	0	0	1	1	6	3	0	1	1	0	0	1	3	1	1	1	1	1	5	1	0	1	0	0	1	0	3	1	0	1	0	0	2
1	4	3	0	0	1	0	1	0	0	1	0	1	1	1	1	0	1	0	0	1	6	0	0	1	1	1	1	1	5	1	1	1	1	1	5	1	1	0	0	1	1	1	5	1	1	0	0	0	6
1	3	3	1	1	0	1	1	0	1	0	1	1	1	0	1	1	0	0	1	1	6	3	0	1	1	0	0	1	3	1	1	1	1	1	5	1	0	1	0	0	1	0	3	1	0	1	0	0	2
1	1	2	2	2	1	0	0	0	0	1	1	1	1	1	1	0	0	0	1	1	6	0	0	1	1	1	1	1	5	1	1	1	1	1	5	1	1	0	0	1	1	1	5	1	0	0	0	0	3
1	1	3	1	1	1	1	1	0	1	0	1	1	1	0	1	1	0	1	1	1	7	3	0	1	1	0	1	1	4	1	1	1	1	1	5	0	1	0	1	1	1	1	5	1	0	0	0	0	1
0	3	3	2	1	1	1	1	0	1	1	1	1	1	1	1	0	1	1	1	1	8	3	0	1	1	1	1	0	4	1	1	0	1	1	4	1	0	0	0	1	1	1	4	1	0	0	0	0	1
0	3	2	1	1	1	1	1	1	1	1	1	1	0	0	1	0	1	0	1	1	5	3	0	1	1	1	1	1	5	1	1	0	1	1	4	1	1	0	0	1	1	0	4	1	0	0	0	0	1
1	2	3	1	1	1	1	1	0	1	0	1	1	1	1	1	0	0	0	1	1	6	2	0	1	1	1	1	1	5	1	1	1	1	0	4	1	1	0	0	1	1	1	5	1	0	0	0	0	2
1	2	3	1	1	1	0	0	0	0	0	1	1	0	0	1	1	1	0	1	0	5	3	0	1	1	1	1	1	5	0	1	1	1	1	4	1	0	0	0	1	1	1	4	1	1	0	0	0	2
1	2	3	1	1	1	0	0	0	0	0	1	1	0	0	1	1	1	0	1	0	5	3	0	1	1	1	1	1	5	0	1	1	1	1	4	1	0	0	0	1	1	1	4	1	1	0	0	0	2
1	2	2	2	1	1	1	1	1	1	1	1	1	1	1	1	1	1	0	1	1	8	3	1	1	1	1	1	1	6	1	1	0	1	1	4	1	1	0	0	1	1	0	4	1	1	1	0	0	6
1	2	2	1	1	1	0	0	1	1	1	1	1	1	1	1	1	1	0	0	1	7	5	0	1	1	1	1	1	5	1	1	0	1	1	4	0	0	0	0	1	1	0	2	0	1	1	0	0	6
1	3	3	2	1	0	0	1	0	1	0	1	1	1	0	1	1	0	0	1	0	5	0	0	1	0	1	1	1	4	1	1	0	1	1	4	1	1	0	1	0	1	1	5	1	0	0	0	0	3
1	3	3	2	2	1	1	1	0	1	0	1	1	1	1	1	1	1	1	1	1	9	3	1	1	1	1	1	1	6	1	1	1	1	1	5	1	1	1	1	0	0	0	4	1	1	1	1	0	1
1	2	3	2	1	1	1	1	1	1	1	1	1	1	0	1	1	1	0	0	1	6	1	0	1	1	0	1	1	4	1	1	1	1	1	5	1	1	0	0	1	1	1	5	1	0	1	0	0	3
1	1	2	1	1	1	0	0	0	1	0	1	1	1	1	1	1	1	0	1	1	8	0	0	1	1	1	1	1	5	1	0	1	1	1	4	1	1	0	0	1	1	0	4	1	1	0	0	0	6
0	1	2	1	1	1	0	1	0	1	1	1	1	1	0	1	0	1	0	1	1	6	0	1	0	1	1	1	1	5	1	1	1	1	1	5	1	0	1	0	1	1	1	5	1	1	1	0	0	2
0	1	3	1	1	0	1	1	1	1	0	1	1	1	0	1	1	0	0	0	0	4	0	0	1	1	0	1	1	4	1	1	1	1	1	5	1	1	1	1	1	1	1	7	1	0	0	0	0	1
1	1	3	1	1	1	0	0	0	1	0	1	1	1	0	1	1	0	1	0	0	5	3	0	1	1	1	1	1	5	1	0	1	1	1	4	1	1	1	1	1	1	1	7	1	0	0	0	0	1
1	4	3	1	1	0	0	1	0	1	0	1	1	1	0	1	1	1	0	1	0	6	0	1	1	1	0	0	1	4	1	1	1	1	1	5	1	0	0	0	1	1	1	4	1	1	1	0	0	6
0	2	3	1	1	0	0	0	0	0	0	1	1	1	0	1	1	1	0	1	1	7	3	1	1	1	0	0	1	4	1	1	1	1	1	5	1	1	1	1	1	1	1	7	1	1	1	0	0	1
1	2	3	1	1	1	0	0	0	1	0	1	1	1	0	1	1	0	1	0	0	5	3	0	0	1	1	1	1	4	1	1	1	1	1	5	1	1	0	0	1	1	1	5	1	0	0	0	0	1
1	3	2	2	1	0	1	1	1	1	1	1	1	1	0	1	0	0	0	1	1	5	3	0	1	1	1	1	1	5	1	1	1	1	1	5	1	1	1	0	1	1	0	5	1	0	0	0	0	2
1	1	3	2	2	0	0	1	0	0	0	1	1	1	0	1	0	0	0	1	0	4	3	0	1	1	1	1	1	5	1	0	0	1	1	3	1	1	1	1	1	1	1	7	1	0	1	0	0	1
1	1	2	2	1	0	0	0	0	1	0	1	1	1	0	1	0	0	0	0	0	3	1	0	1	1	1	1	1	5	1	1	1	1	1	5	0	1	1	0	1	1	0	4	1	1	0	0	0	1
0	2	3	1	1	0	1	1	0	0	0	1	1	1	0	1	1	0	0	0	1	5	3	0	1	1	0	1	1	4	1	1	1	1	1	5	1	1	1	1	0	1	1	6	1	1	0	0	0	1
1	3	3	1	1	0	0	1	0	1	0	1	1	1	0	0	0	0	0	0	0	2	0	0	1	1	1	0	1	4	1	1	0	1	1	4	1	1	0	0	0	1	0	3	1	1	0	0	0	1
1	1	2	1	2	1	1	1	1	1	1	1	1	1	0	1	1	0	0	1	0	5	3	0	1	1	1	1	1	5	1	1	0	1	1	4	1	1	1	1	0	1	0	5	1	1	0	0	0	1
1	1	3	2	2	0	0	0	0	0	0	1	1	1	0	1	1	1	0	1	0	6	0	1	1	1	0	1	1	5	1	1	1	1	1	5	1	1	0	0	1	1	1	5	1	1	1	1	0	1
1	2	3	1	1	0	1	1	0	0	0	0	1	1	0	1	1	1	0	0	0	5	3	0	1	1	1	1	0	4	1	1	1	1	1	5	1	1	0	0	1	1	1	5	1	1	1	0	0	1
1	1	3	2	1	1	0	0	0	0	0	1	1	1	0	1	0	0	0	1	0	4	3	0	1	1	1	1	1	5	1	1	1	1	1	5	1	1	1	1	1	1	1	7	1	0	0	0	0	1
1	4	3	1	1	0	0	0	0	0	0	1	1	1	0	1	1	0	0	0	1	5	3	0	1	1	1	1	1	5	0	1	0	1	1	3	1	1	0	1	1	1	1	6	1	0	0	0	0	2
1	1	3	2	1	1	0	0	0	1	0	1	1	1	0	0	1	0	0	1	0	4	3	0	1	1	1	1	1	5	1	0	0	1	1	3	1	1	0	0	1	1	1	5	0	0	0	0	1	1
1	4	3	2	2	0	0	0	0	1	0	0	1	1	0	1	0	1	0	0	1	5	0	0	0	1	1	1	0	3	1	1	1	1	1	5	1	1	1	1	1	1	0	6	1	0	0	0	0	2
0	2	3	2	1	1	0	0	0	1	0	1	1	1	0	1	1	1	0	1	1	7	3	0	1	1	1	1	1	5	1	1	0	1	1	4	1	1	0	0	1	1	1	5	1	1	1	0	0	1
1	1	3	2	2	0	0	0	0	0	0	1	0	0	0	0	0	0	0	1	0	1	0	0	0	0	1	1	1	3	1	1	0	1	1	4	1	1	0	0	1	1	1	5	1	0	0	0	0	1
0	1	3	0	1	1	1	0	0	1	0	1	1	1	0	1	1	1	1	1	1	8	5	0	1	1	1	1	1	5	1	1	0	1	1	4	1	1	1	1	0	0	0	4	1	1	1	0	0	1
0	2	3	1	1	1	1	1	0	1	1	1	1	1	0	1	0	1	0	0	1	5	0	1	1	1	1	1	1	6	1	1	1	1	1	5	0	1	0	0	1	1	0	3	1	1	1	0	0	5
0	1	2	1	1	1	0	0	0	0	0	0	1	1	0	1	0	0	0	0	0	3	3	0	1	1	1	1	1	5	1	1	1	1	1	5	1	1	0	0	1	1	1	5	1	1	0	0	0	1
1	0	2	2	1	1	1	0	0	0	0	0	1	1	1	1	0	0	0	0	1	5	0	0	0	1	0	0	1	2	1	1	1	1	1	5	1	1	0	0	1	1	0	4	0	0	0	0	1	1
1	1	2	2	2	0	1	1	1	1	0	0	1	1	0	1	1	0	0	1	0	5	3	0	1	1	1	0	1	4	1	0	0	1	1	3	1	1	0	0	1	1	1	5	1	1	1	0	0	1
1	5	3	1	1	0	0	0	0	1	0	1	1	1	1	1	1	1	0	1	1	8	5	0	1	1	1	1	0	4	1	1	0	1	1	4	1	1	0	1	0	1	1	5	1	0	0	0	0	1
1	2	3	1	1	0	0	1	0	1	0	1	1	1	0	1	0	0	0	1	1	5	3	1	1	1	1	1	1	6	1	1	0	1	1	4	1	1	0	0	1	1	1	5	1	1	0	0	0	2
1	2	3	1	1	0	1	1	1	0	0	0	1	1	0	1	1	1	0	1	0	6	3	0	1	1	1	1	1	5	1	0	0	1	1	3	1	1	0	0	1	1	1	5	1	0	0	0	0	2
0	5	3	1	1	1	0	0	0	0	1	1	1	1	0	1	0	1	1	1	1	7	3	0	0	1	1	1	1	4	1	1	1	1	1	5	1	1	0	0	1	1	1	5	1	0	0	0	0	1
0	1	2	2	2	1	0	1	0	1	1	1	1	1	0	1	1	1	0	0	1	6	0	0	1	1	0	1	1	4	1	1	0	1	1	4	1	1	0	0	1	1	1	5	1	1	0	0	0	1
1	2	3	1	1	0	0	1	0	1	0	1	1	1	1	1	1	0	1	1	0	7	3	0	1	1	1	1	1	5	1	0	0	1	1	3	1	1	0	0	1	1	1	5	1	1	1	0	0	1
1	3	3	2	1	0	0	0	0	1	0	1	1	0	0	1	0	0	0	0	1	3	3	0	0	1	1	1	1	4	1	1	1	1	1	5	1	1	0	0	1	1	1	5	0	0	0	0	1	2
1	1	3	1	1	1	0	0	0	1	0	1	1	1	0	1	0	1	0	0	0	4	3	1	1	1	0	0	1	4	1	1	1	1	1	5	1	1	0	0	1	1	1	5	1	0	1	0	0	1
1	1	3	2	1	1	1	1	0	1	0	1	1	1	1	1	1	0	0	1	1	7	3	0	1	1	1	1	1	5	1	1	1	1	1	5	1	1	1	1	0	1	0	5	1	0	1	0	0	1
1	2	3	1	1	0	0	1	0	0	0	1	1	1	0	1	0	0	0	0	0	3	3	1	1	0	1	1	1	5	0	1	1	1	0	3	1	1	0	0	1	1	1	5	1	0	0	0	0	1
1	1	3	2	2	1	0	0	0	0	0	0	1	1	1	1	1	0	0	1	0	6	3	1	1	1	0	1	1	5	1	0	0	1	1	3	0	1	1	1	0	1	0	4	1	1	1	0	0	1
1	4	3	2	1	1	1	0	1	1	1	1	1	1	1	1	1	1	0	1	1	8	3	0	1	1	1	1	1	5	1	1	1	1	1	5	1	1	1	1	1	1	0	6	1	0	1	0	0	0
1	2	2	2	1	1	0	0	0	1	1	1	1	1	1	1	1	1	1	1	1	9	3	0	1	1	1	1	1	5	1	1	0	1	1	4	1	1	0	0	1	1	1	5	1	1	0	0	0	4
1	1	3	2	2	0	0	0	0	0	0	1	1	1	0	1	0	0	0	1	0	4	3	0	1	1	0	1	1	4	1	1	0	1	1	4	1	1	0	0	1	1	1	5	1	1	0	0	0	1
0	2	3	1	1	1	0	1	0	1	0	0	1	1	0	1	1	1	0	1	1	7	3	0	1	0	0	0	1	2	1	1	0	1	1	4	1	1	0	0	1	1	1	5	1	1	0	0	0	1
1	1	3	1	1	1	0	0	1	0	0	0	1	1	0	1	0	0	0	0	0	3	0	0	1	1	1	1	1	5	1	1	0	1	1	4	1	1	1	0	1	1	1	6	1	0	0	0	0	2
1	1	3	2	1	0	0	0	0	1	0	1	1	1	0	1	0	1	0	1	0	5	3	0	1	1	0	1	1	4	1	1	0	1	1	4	1	1	0	0	1	1	1	5	1	1	0	0	0	1
1	1	3	1	1	1	0	0	0	1	0	1	1	0	0	1	1	1	0	0	1	5	0	1	1	1	0	1	1	5	1	1	1	1	1	5	1	1	1	1	0	1	0	5	1	1	0	0	0	1
0	2	3	1	1	0	0	0	0	0	0	1	1	1	1	1	1	1	1	1	1	9	3	0	1	1	1	1	1	5	1	1	0	1	1	4	1	1	0	0	1	1	1	5	1	1	1	1	0	2
0	1	3	0	1	1	0	0	1	1	0	1	1	1	0	0	0	0	0	0	0	2	0	0	1	1	1	1	1	5	1	1	1	1	1	5	1	1	0	0	1	1	1	5	0	0	1	0	0	2
1	1	2	2	1	0	1	0	0	1	0	1	1	1	0	1	0	0	0	0	1	4	3	0	1	1	0	1	1	4	1	1	1	1	1	5	1	1	0	0	1	1	1	5	1	1	0	0	0	2
1	4	3	1	1	1	1	1	0	0	0	1	1	1	0	1	0	1	0	1	1	6	0	0	1	1	1	1	1	5	1	0	1	1	1	4	1	1	0	0	1	1	1	5	1	1	0	0	0	2
1	3	3	1	1	1	1	1	0	1	0	0	1	1	1	1	0	0	0	1	1	6	0	1	1	1	1	1	1	6	1	0	0	1	1	3	1	1	0	0	1	1	1	5	1	0	0	0	0	1
1	1	3	1	1	1	1	1	0	1	0	1	1	1	0	1	1	0	0	0	0	4	0	0	1	1	1	1	1	5	1	1	0	1	1	4	1	1	0	0	1	1	1	5	1	1	0	0	0	1
1	3	2	0	1	1	0	1	0	1	1	1	1	1	0	1	1	1	0	0	0	5	3	0	1	1	1	1	0	4	0	1	1	1	0	3	0	1	1	1	1	1	1	6	1	0	0	0	0	3
0	1	3	1	1	0	1	1	1	1	0	0	1	1	1	1	0	0	0	0	0	4	1	1	1	1	1	1	0	5	1	1	0	1	1	4	1	1	0	0	1	1	0	4	1	0	0	0	0	1
1	1	3	1	1	0	0	0	0	1	0	1	1	1	0	1	1	0	0	1	1	6	3	0	1	1	1	1	1	5	1	1	0	1	1	4	1	1	0	0	1	1	1	5	1	0	0	0	0	1
1	3	3	2	1	1	0	0	0	1	1	0	1	1	1	1	0	1	0	1	1	7	0	0	1	1	1	1	1	5	1	1	1	1	1	5	1	1	0	1	0	1	1	5	1	0	0	0	0	1
1	3	3	0	2	0	1	1	0	1	0	1	1	1	0	1	0	0	0	1	0	4	3	0	1	1	1	1	1	5	1	0	0	1	1	3	1	1	1	0	1	1	0	5	1	0	0	0	0	1
1	1	3	2	1	1	0	0	0	0	0	1	1	0	1	1	1	0	0	1	1	6	3	0	1	1	1	1	1	5	0	1	1	1	1	4	1	1	1	0	1	1	0	5	1	0	1	0	0	1
1	1	3	0	0	1	1	0	0	0	1	0	0	1	0	0	0	1	0	1	1	4	1	0	1	1	1	1	1	5	0	1	1	1	1	4	1	1	0	0	1	1	1	5	1	0	1	0	0	5
1	1	3	1	1	1	1	1	0	1	0	1	1	1	0	1	1	0	0	0	0	4	0	0	1	1	1	1	1	5	1	1	0	1	1	4	1	1	0	0	1	1	1	5	1	1	0	0	0	1
1	1	3	1	1	1	0	0	0	0	0	0	1	1	0	1	0	1	1	1	0	6	3	0	1	1	0	1	1	4	1	1	0	1	1	4	0	1	1	1	1	1	0	5	1	1	0	0	0	2
0	1	3	1	1	0	0	1	1	1	0	0	1	1	0	1	0	1	0	0	1	5	3	0	1	1	1	1	1	5	1	1	0	1	1	4	1	1	0	0	1	1	1	5	1	0	0	0	0	1
1	1	2	2	1	1	1	1	1	1	1	1	1	1	0	1	1	0	1	1	1	7	3	0	1	1	1	1	1	5	1	1	1	1	1	5	1	1	1	1	1	1	0	6	1	1	0	0	0	1
1	3	3	2	1	0	0	0	0	0	0	1	1	0	0	1	1	1	0	1	0	5	3	0	0	0	1	1	1	3	1	0	0	1	1	3	0	1	1	0	0	1	0	3	1	1	1	0	0	1
1	1	3	2	1	0	0	0	0	1	0	1	1	1	0	1	1	0	0	1	0	5	3	0	0	1	1	0	1	3	1	0	0	1	1	3	0	1	1	1	1	1	1	6	1	0	1	0	0	1
1	1	3	0	0	0	0	1	1	0	0	0	1	1	0	1	0	0	0	1	0	4	0	1	1	1	1	1	1	6	1	1	1	1	1	5	1	1	0	0	1	1	1	5	1	1	1	0	0	1
1	4	3	1	1	0	0	1	0	1	0	1	1	1	0	1	0	1	1	1	1	7	3	0	1	1	1	1	1	5	1	0	0	1	1	3	0	1	1	1	0	1	0	4	1	0	0	0	0	2
0	1	3	2	1	1	0	0	0	1	1	0	1	0	1	1	0	1	0	0	1	5	3	0	0	1	1	1	1	4	1	1	0	1	1	4	1	1	0	0	1	1	1	5	0	1	0	0	0	1
1	1	3	2	2	1	0	0	0	1	0	1	1	1	1	1	0	0	0	0	0	4	3	1	1	1	1	1	1	6	1	1	1	1	1	5	1	1	0	0	1	1	1	5	1	1	1	0	0	3
1	1	3	2	2	1	0	0	0	0	0	1	0	1	0	1	0	0	0	0	1	3	3	0	1	1	1	1	1	5	1	1	0	1	1	4	1	1	0	0	1	1	1	5	1	1	1	0	0	2
1	2	3	0	1	1	0	0	0	0	0	0	1	1	0	1	1	0	0	0	0	4	3	1	1	1	0	1	1	5	1	1	1	1	1	5	1	1	0	0	1	1	1	5	1	1	0	0	0	1
1	1	2	1	1	1	0	1	0	1	0	1	1	1	1	1	1	1	0	0	0	6	5	0	1	1	1	1	1	5	1	1	0	1	1	4	1	1	0	0	1	1	1	5	1	1	0	0	0	2
1	3	3	1	1	1	0	1	0	0	0	1	1	1	0	1	1	0	0	1	0	5	5	1	1	1	1	1	1	6	1	0	1	1	0	3	0	1	0	1	1	1	0	4	1	1	1	0	0	2
0	1	2	0	0	0	0	1	0	0	0	0	1	1	1	1	1	1	0	1	1	8	1	0	0	1	1	1	0	3	1	0	0	0	0	1	1	1	0	0	1	1	1	5	0	1	0	0	0	0
1	2	3	0	0	1	0	0	0	0	1	0	1	1	1	1	1	1	0	0	0	6	3	0	1	0	1	1	1	4	0	1	1	1	1	4	1	0	1	0	1	1	0	4	1	0	1	0	0	1
1	1	3	1	1	1	0	0	0	0	0	0	1	1	0	1	0	0	0	1	0	4	3	0	1	1	1	1	1	5	1	0	1	1	1	4	0	0	1	0	1	1	1	4	1	0	1	0	0	0
1	2	1	1	1	1	1	1	0	0	0	0	1	1	0	1	0	0	0	1	0	4	3	0	1	1	1	1	1	5	1	1	1	1	1	5	1	1	0	1	1	1	1	6	0	0	0	0	1	3
1	2	3	1	1	0	0	0	0	1	0	1	1	1	0	1	0	0	0	1	1	5	3	0	1	1	1	1	1	5	1	0	0	1	1	3	1	1	0	0	1	1	1	5	1	0	1	0	0	1
1	3	3	1	1	1	1	1	0	1	0	1	1	0	0	1	1	0	0	0	1	4	3	0	1	1	1	1	1	5	1	1	0	1	1	4	1	1	0	0	1	1	1	5	1	1	0	0	0	2
1	3	3	2	2	1	0	0	0	0	0	0	1	1	0	1	1	1	0	0	0	5	3	0	0	1	1	1	1	4	1	0	0	1	1	3	1	1	0	0	1	1	1	5	1	1	0	0	0	2
1	1	2	1	1	0	0	0	0	1	0	1	1	0	0	1	0	1	0	1	0	4	3	0	1	1	1	1	1	5	1	1	1	1	0	4	1	1	0	0	1	1	1	5	1	1	0	0	0	1
1	1	3	1	1	1	1	1	0	1	0	1	1	1	0	1	1	1	0	1	1	7	3	1	1	1	0	1	1	5	1	0	0	1	1	3	1	1	0	0	1	1	1	5	1	0	0	0	0	1
1	1	2	2	2	1	0	0	0	1	0	1	1	0	0	1	1	1	0	1	1	6	3	0	1	1	1	1	1	5	1	0	0	1	1	3	1	1	0	0	1	1	0	4	1	1	1	0	0	3
1	1	3	2	2	1	1	0	0	1	0	1	1	1	0	1	0	1	0	1	1	6	3	0	1	1	1	1	1	5	0	1	0	1	1	3	0	1	1	1	1	1	0	5	1	1	0	0	0	1
1	2	3	1	1	1	1	0	0	1	0	1	1	1	0	1	0	0	0	1	0	4	0	0	1	1	0	0	1	3	1	1	1	1	1	5	0	1	1	0	0	1	0	3	1	1	1	0	0	1
1	2	3	1	1	1	0	0	0	0	0	1	1	1	0	1	1	1	1	1	1	8	3	1	1	1	1	1	1	6	1	1	1	1	1	5	1	1	0	0	1	1	1	5	1	0	0	0	0	1
1	5	3	1	1	1	1	1	1	1	0	1	1	1	0	1	0	0	0	0	0	3	3	1	1	1	1	1	1	6	1	1	1	1	1	5	1	1	0	0	1	1	1	5	1	1	0	0	0	1
0	1	2	1	1	0	0	0	0	1	0	0	1	1	1	1	0	0	0	1	0	5	3	0	1	1	1	1	1	5	1	1	1	1	1	5	1	1	1	1	1	1	1	7	1	0	0	0	0	1
1	2	3	1	1	0	0	0	0	1	0	1	1	1	0	1	1	1	0	1	0	6	3	0	1	1	1	1	1	5	1	1	1	1	1	5	1	1	0	0	1	1	1	5	1	1	0	0	0	1
1	1	3	1	1	0	0	0	0	1	0	1	0	1	0	1	0	1	0	1	0	4	3	0	1	1	1	1	1	5	1	1	1	1	1	5	1	1	0	0	1	1	1	5	1	1	1	0	0	1
1	3	3	2	1	1	1	0	0	1	1	1	1	1	0	1	1	1	0	1	0	6	3	1	1	1	1	1	1	6	1	0	1	1	1	4	0	1	1	1	1	1	0	5	1	0	0	0	0	3
0	1	3	1	1	0	0	0	0	0	0	1	1	1	0	1	0	1	0	0	0	4	3	0	1	1	1	1	1	5	1	1	1	1	1	5	1	1	0	0	1	1	1	5	1	0	0	0	0	1
1	2	3	2	2	1	1	0	0	1	0	0	1	1	1	1	0	1	1	1	0	7	0	0	1	1	1	1	1	5	1	1	1	1	1	5	1	1	1	1	1	1	0	6	1	1	1	0	0	1
1	1	2	1	1	0	0	0	0	0	0	1	1	1	0	1	1	0	0	1	0	5	3	0	1	1	1	1	1	5	1	0	0	1	1	3	1	1	1	1	1	1	1	7	1	1	0	0	0	0
1	1	2	1	1	0	0	1	0	1	1	1	1	1	0	1	1	0	0	0	0	4	0	0	1	1	1	1	1	5	1	1	0	1	0	3	0	0	0	0	1	1	1	3	1	0	0	0	0	0
1	1	3	1	2	1	1	0	0	1	0	0	1	1	1	1	1	1	1	1	1	9	3	1	1	1	0	1	1	5	1	1	1	1	1	5	1	1	1	1	0	1	0	5	1	1	0	0	0	1
1	3	3	2	2	1	0	0	0	1	0	1	1	1	0	1	0	1	0	1	0	5	3	0	1	1	0	1	1	4	1	1	1	1	1	5	1	1	1	0	1	1	0	5	1	0	0	0	0	5
1	1	2	2	1	0	1	0	0	0	0	1	1	1	1	1	1	1	0	0	0	6	3	0	1	1	1	1	1	5	1	1	0	1	1	4	1	1	1	1	1	1	1	7	1	0	0	0	1	1
1	1	2	2	2	1	1	0	0	0	0	0	1	1	0	1	1	1	0	1	1	7	3	0	1	1	0	0	1	3	1	1	1	1	1	5	1	1	0	0	1	1	1	5	1	1	0	0	0	4
1	0	1	2	1	0	0	1	0	0	0	0	1	1	1	1	0	0	0	0	1	5	3	1	0	1	1	1	1	5	1	1	1	1	1	5	1	0	0	0	1	1	1	4	1	0	0	0	0	2
0	1	2	1	1	1	1	0	1	1	0	1	1	1	0	1	0	1	1	1	0	6	0	1	1	1	0	1	1	5	1	1	0	1	1	4	1	1	0	0	1	1	1	5	1	0	0	0	1	1
1	1	3	2	1	0	0	0	0	1	0	1	1	1	0	1	0	1	0	0	0	4	3	0	1	1	1	1	1	5	1	1	0	1	1	4	1	1	0	0	1	1	1	5	1	0	0	0	0	1
0	1	2	1	1	0	0	0	0	1	0	1	1	1	0	1	1	0	0	0	0	4	0	1	1	1	0	1	1	5	1	1	0	1	1	4	1	1	0	1	0	1	0	4	1	1	0	0	0	1
1	4	3	1	1	0	0	1	0	1	0	0	0	1	0	1	1	1	0	0	0	4	3	0	0	1	1	1	1	4	1	0	0	1	1	3	1	1	1	0	1	1	1	6	1	0	0	0	0	1
1	0	3	1	1	1	1	1	0	0	0	1	1	1	1	1	1	1	0	1	1	8	3	0	1	1	0	0	1	3	1	0	1	1	1	4	1	1	1	0	0	1	0	4	1	1	1	1	0	0
1	2	3	2	1	1	0	1	0	0	0	0	1	1	0	1	1	1	0	1	1	7	3	0	1	1	1	1	1	5	1	1	1	1	1	5	1	1	1	1	1	1	1	7	1	0	1	0	0	1
0	1	3	0	2	0	0	0	0	0	0	1	1	1	0	1	1	0	1	0	0	5	3	0	1	1	0	1	1	4	1	1	1	1	1	5	1	1	1	1	1	1	1	7	1	1	0	0	0	2
1	1	3	2	2	0	0	0	0	1	0	1	1	1	0	1	0	1	0	1	0	5	5	0	1	1	1	1	1	5	1	0	0	1	1	3	1	1	1	1	1	1	1	7	1	1	0	0	0	1
1	3	3	1	2	0	0	0	0	0	0	1	1	0	0	1	0	1	0	0	0	3	5	0	0	1	1	1	1	4	1	0	0	1	1	3	1	1	1	1	1	1	0	6	1	1	0	0	0	1
1	1	3	2	2	1	0	0	0	1	0	0	1	1	0	1	1	0	0	0	0	4	3	0	1	1	1	1	0	4	1	1	0	1	1	4	1	1	1	1	1	1	1	7	1	1	0	0	0	1
0	1	2	1	1	0	0	0	0	1	0	1	1	1	0	1	0	0	0	1	0	4	3	0	1	1	1	1	1	5	1	0	0	1	1	3	1	1	0	0	1	1	1	5	1	1	0	0	0	1
1	4	3	1	1	1	1	1	0	0	0	1	1	1	1	1	1	1	0	1	1	8	3	0	1	1	1	1	1	5	1	1	0	1	1	4	1	1	0	0	1	1	1	5	1	0	0	0	0	1
1	1	3	1	1	1	0	0	0	1	0	1	1	1	0	1	1	0	0	0	0	4	1	0	1	1	1	1	1	5	1	1	0	1	1	4	1	1	0	0	1	1	1	5	1	1	1	0	0	4
1	4	3	1	1	0	1	1	1	1	0	1	1	1	0	1	1	1	0	1	1	7	3	1	1	1	1	1	1	6	1	1	1	1	1	5	1	1	0	0	1	1	1	5	1	0	0	0	0	1
0	4	3	1	1	0	1	0	1	1	0	1	1	1	1	1	1	0	0	0	1	6	3	1	1	1	0	1	1	5	1	1	1	1	1	5	1	1	0	0	1	1	0	4	1	1	1	0	0	2
0	1	2	1	1	1	0	0	0	0	0	1	1	1	0	1	0	1	0	0	0	4	0	0	1	1	1	1	1	5	1	0	0	1	1	3	1	1	1	1	1	1	1	7	1	1	0	0	0	1
1	3	3	1	1	1	1	0	0	1	0	1	1	1	1	1	1	1	1	1	1	9	3	0	1	1	1	0	1	4	1	1	1	1	1	5	1	1	0	0	1	1	1	5	1	0	0	0	0	1
1	1	3	1	1	1	0	0	0	0	0	1	1	1	1	1	1	1	1	1	1	9	0	1	1	1	0	0	1	4	1	1	1	1	1	5	1	1	1	1	1	1	1	7	1	1	0	0	0	2
1	3	3	1	1	1	0	0	0	0	0	0	1	1	1	1	0	1	0	1	0	6	3	0	1	1	1	1	1	5	1	1	1	1	1	5	0	0	0	0	0	1	0	1	1	0	0	0	0	1
1	1	3	1	1	1	1	0	0	0	0	0	1	0	0	1	1	0	0	0	0	3	0	1	0	0	1	1	1	4	1	1	1	1	1	5	1	1	0	0	1	1	0	4	1	0	0	0	0	5
1	3	3	2	1	1	0	1	0	1	0	1	1	1	0	1	1	1	0	1	1	7	3	0	1	1	1	1	1	5	1	1	1	1	1	5	1	1	0	0	1	1	1	5	1	0	1	0	0	2
1	3	2	1	1	1	1	1	1	1	0	1	1	1	1	1	1	1	0	1	1	8	3	0	1	0	1	1	0	3	1	1	1	1	1	5	1	1	0	0	1	1	0	4	1	0	0	0	0	2
1	2	3	1	1	1	0	0	0	0	0	1	1	1	1	1	1	1	0	0	0	6	3	0	1	1	1	1	1	5	1	0	0	1	1	3	1	1	0	0	1	1	1	5	1	1	0	0	0	1
0	1	3	2	2	1	0	0	0	1	1	1	1	1	1	1	1	1	0	1	0	7	3	1	1	1	0	1	1	5	1	1	1	1	1	5	1	1	0	0	1	1	0	4	1	1	1	0	0	1
1	2	3	1	1	0	0	0	0	0	0	1	1	0	1	1	1	1	1	1	1	8	3	0	0	1	1	1	0	3	1	0	1	1	0	3	0	1	0	0	0	1	0	2	1	1	1	0	0	1
1	1	2	2	2	0	0	0	0	0	0	1	1	1	0	1	0	0	0	0	1	4	3	0	1	0	0	1	1	3	1	0	0	1	1	3	1	1	0	0	1	1	1	5	1	0	1	0	0	1
1	1	3	2	2	0	0	0	0	0	0	1	1	1	0	1	1	0	0	1	0	5	3	0	1	1	1	1	1	5	1	1	1	1	1	5	1	1	0	0	1	1	1	5	1	0	0	0	0	1
0	1	3	2	2	1	0	0	0	1	0	1	1	1	0	1	1	0	0	0	0	4	3	0	1	1	0	1	1	4	1	0	0	1	1	3	1	1	0	0	1	1	1	5	1	0	1	0	0	1
1	2	2	2	2	0	1	1	0	1	0	0	1	1	0	1	1	1	1	0	0	6	0	1	0	1	1	1	1	5	1	1	1	1	1	5	1	0	1	0	1	1	1	5	1	0	0	0	0	2
0	1	3	1	1	1	0	0	0	1	0	0	1	0	1	1	0	1	0	0	0	4	5	0	1	1	1	1	1	5	1	0	0	1	1	3	0	1	0	0	0	1	0	2	1	1	0	0	0	2
1	1	3	1	1	0	0	1	0	0	0	0	1	1	1	1	1	1	1	1	1	9	5	0	0	1	1	1	1	4	1	1	0	1	1	4	1	1	1	1	0	1	0	5	1	0	0	0	0	4
0	1	3	1	2	1	0	0	0	0	0	0	1	1	0	1	1	0	0	0	0	4	3	0	1	1	1	1	1	5	1	1	1	1	1	5	1	1	0	0	1	1	1	5	1	0	0	0	0	1
1	1	3	2	1	1	0	0	0	0	0	0	1	1	1	0	1	0	0	0	0	4	0	0	1	1	1	1	1	5	1	1	1	1	1	5	1	1	0	0	1	1	1	5	1	1	0	0	0	3
1	1	3	2	1	1	0	0	0	1	0	1	1	1	1	1	0	1	0	0	0	5	0	0	1	1	1	1	1	5	1	1	0	1	1	4	1	1	0	0	1	1	1	5	1	0	0	0	0	1
0	1	2	1	1	1	0	0	0	1	0	1	1	1	1	1	1	1	0	1	0	7	3	1	1	1	1	1	1	6	1	1	1	1	1	5	1	1	0	1	0	1	0	4	1	1	0	0	0	2
1	2	3	1	1	1	0	0	0	0	0	1	1	0	0	1	0	0	0	0	1	3	0	0	1	1	1	1	1	5	1	0	1	1	1	4	1	1	0	0	1	1	1	5	1	0	0	0	0	1
0	1	3	2	2	0	1	1	1	1	1	1	1	1	1	1	0	1	1	0	0	6	3	1	1	1	0	1	1	5	1	1	1	1	1	5	0	0	0	0	1	1	0	2	1	1	1	0	0	2
1	2	3	2	1	1	1	1	1	1	1	1	1	1	1	1	1	1	0	1	1	8	0	0	1	1	0	1	1	4	1	1	0	1	0	3	1	1	1	1	1	1	1	7	1	1	0	0	0	1
1	3	3	1	1	1	1	1	1	1	1	1	1	1	1	1	1	1	1	1	1	9	3	1	1	1	1	1	1	6	1	1	1	1	1	5	1	1	1	1	1	1	0	6	1	1	0	0	0	2
0	4	3	1	1	1	1	1	1	1	1	1	1	1	1	1	1	1	1	0	1	8	3	1	1	1	0	1	1	5	1	1	1	1	1	5	1	1	1	1	1	1	0	6	1	1	0	0	0	2
1	2	2	0	2	0	0	1	0	1	1	0	1	1	1	1	0	0	0	1	0	5	3	1	1	1	0	0	1	4	1	1	1	1	1	5	0	1	0	0	0	1	0	2	1	0	1	0	0	4
1	3	3	0	2	1	1	1	0	0	1	0	1	1	1	1	1	1	1	1	1	9	0	0	1	1	1	1	1	5	1	1	1	1	1	5	1	1	0	0	1	1	1	5	0	0	1	0	0	2
1	2	1	1	1	0	1	0	0	1	0	1	1	1	1	1	1	1	1	1	1	9	3	0	0	1	1	1	1	4	1	1	0	1	0	3	1	1	0	0	1	1	0	4	1	1	1	0	0	2
0	1	3	1	1	1	0	0	0	1	0	1	1	1	0	1	1	1	0	1	0	6	0	1	1	1	1	1	1	6	0	1	1	1	1	4	0	1	0	0	0	1	0	2	1	1	0	0	0	1
0	1	2	1	1	0	1	1	0	1	0	1	1	1	0	1	0	0	1	0	0	4	1	0	1	1	0	1	0	3	1	0	0	1	0	2	1	1	0	1	0	1	1	5	1	0	0	0	0	1
0	1	3	2	2	0	0	0	0	0	0	1	1	1	0	1	0	0	0	0	0	3	3	0	1	1	1	1	1	5	1	1	0	1	1	4	1	1	1	1	1	1	1	7	1	0	0	0	0	1
1	3	3	1	2	1	0	1	0	0	0	0	1	1	0	1	1	1	0	1	1	7	0	0	1	1	1	1	1	5	1	0	0	1	1	3	1	1	0	0	1	1	1	5	1	0	0	0	0	1
1	2	3	2	1	1	0	1	0	1	0	1	1	1	0	1	1	1	1	1	1	8	3	0	1	1	1	1	1	5	1	1	1	1	1	5	1	1	0	0	1	1	1	5	1	1	1	0	0	2
1	1	3	1	1	1	0	0	0	1	0	1	1	1	0	1	0	0	0	1	1	5	3	0	1	1	1	1	1	5	1	0	0	1	1	3	1	1	1	0	0	1	0	4	1	1	0	0	0	1
0	2	1	1	1	0	1	1	0	1	0	1	1	1	0	1	1	0	0	0	1	5	0	0	1	1	1	0	1	4	1	1	1	1	1	5	1	1	0	0	0	1	0	3	1	0	0	0	0	1
0	1	2	2	2	1	0	1	0	0	1	1	1	1	1	1	0	1	0	1	0	6	3	0	1	1	1	1	0	4	1	0	0	1	1	3	1	1	0	0	1	1	1	5	1	1	0	0	0	1
0	1	3	1	1	1	1	1	0	0	0	1	1	1	1	1	1	0	0	0	0	5	2	0	1	1	0	1	1	4	1	1	0	1	1	4	1	1	0	0	0	1	1	4	1	0	0	0	0	1
0	1	3	1	1	1	0	0	0	1	1	1	1	1	1	1	0	0	0	1	0	5	3	0	1	1	1	1	1	5	1	1	0	1	1	4	1	1	0	1	0	1	1	5	1	1	1	0	0	0
0	2	3	1	1	1	1	1	1	1	1	1	1	1	0	1	0	1	1	1	0	6	1	0	1	1	0	1	1	4	1	1	1	1	1	5	1	1	1	0	0	1	0	4	0	1	1	0	0	2
1	3	2	0	2	1	0	1	0	0	0	0	1	1	0	1	0	0	0	1	1	5	1	0	1	1	1	1	1	5	1	0	0	1	1	3	1	1	0	0	0	1	0	3	1	0	0	0	0	1
0	1	3	1	1	0	0	1	0	0	0	1	1	1	0	1	0	0	0	1	0	4	1	0	1	1	1	1	1	5	0	1	0	1	1	3	1	1	0	0	1	1	1	5	1	1	0	0	0	2
1	2	2	1	1	1	0	0	0	0	0	0	1	1	1	1	1	1	0	1	1	8	3	0	0	0	1	1	1	3	1	1	1	1	1	5	1	1	0	0	0	1	0	3	0	0	1	0	0	3
1	2	3	1	1	0	0	0	0	1	0	1	1	1	0	1	1	0	0	0	0	4	3	0	1	1	1	1	1	5	1	1	1	1	1	5	1	1	0	0	1	1	1	5	1	1	0	0	0	1
1	4	3	2	1	1	1	0	0	0	0	1	1	0	0	1	0	1	0	0	1	4	0	0	0	1	1	1	0	3	1	1	1	1	1	5	1	1	0	0	1	1	1	5	1	0	0	0	0	0
0	1	3	2	2	0	0	0	0	1	0	0	0	0	0	1	0	0	0	0	0	1	0	0	0	0	1	1	1	3	0	0	1	0	0	1	0	1	0	0	1	1	0	3	0	0	1	0	0	1
1	1	3	2	1	1	1	1	0	1	0	0	1	1	0	1	0	1	1	1	1	7	0	0	1	1	1	1	1	5	1	1	1	1	1	5	0	1	1	1	0	1	0	4	1	0	0	0	0	1
1	1	3	0	2	1	0	0	0	0	0	1	1	1	0	1	1	0	0	0	0	4	1	1	1	0	1	1	1	5	1	0	1	1	1	4	0	1	1	0	0	1	0	3	0	0	1	0	0	1
1	3	2	1	2	0	0	1	0	0	0	0	1	1	0	1	1	1	0	0	0	5	3	0	0	1	1	1	0	3	1	1	1	1	1	5	0	1	0	0	1	1	0	3	1	0	0	0	0	2
1	1	3	1	1	0	0	0	0	1	0	0	1	1	1	1	0	0	0	1	1	6	3	0	1	1	1	1	1	5	1	1	1	1	0	4	1	1	1	0	1	1	0	5	1	0	1	0	0	1
0	1	3	2	1	0	0	0	0	1	0	1	1	1	1	0	0	0	0	0	0	3	0	0	0	1	1	0	1	3	1	0	0	1	1	3	1	1	1	0	1	1	0	5	1	1	0	0	0	1
0	1	3	2	1	0	0	1	0	0	0	1	1	1	0	1	1	0	0	1	1	6	3	0	1	1	1	1	1	5	1	1	1	1	1	5	1	1	0	0	1	1	1	5	1	1	0	0	0	2
0	4	2	1	1	1	0	0	0	0	0	0	1	0	0	0	0	0	0	0	0	1	0	0	1	1	1	1	0	4	1	0	0	0	0	1	1	1	0	0	1	1	0	4	1	0	0	0	0	2
1	3	0	1	1	1	0	1	0	0	0	0	1	1	1	1	1	0	0	0	1	6	3	0	1	1	1	1	1	5	1	1	1	1	1	5	1	1	0	0	1	1	1	5	1	1	0	0	0	5
0	5	3	2	1	1	0	1	0	0	0	1	1	1	1	1	1	1	1	1	1	9	5	0	1	1	1	1	1	5	1	1	1	1	1	5	1	1	0	0	0	1	0	3	1	0	1	0	0	0
1	0	1	2	2	0	0	1	0	1	0	0	1	1	1	1	0	0	0	0	0	4	3	1	0	1	1	1	1	5	1	1	1	1	1	5	1	1	0	0	1	1	1	5	1	1	0	0	0	4
0	1	2	1	1	0	0	0	0	1	0	1	1	1	0	1	1	0	0	0	0	4	0	0	1	1	1	1	1	5	1	0	0	1	1	3	1	1	0	0	1	1	1	5	1	0	0	0	0	1
1	2	2	1	1	0	0	1	1	0	1	1	1	1	0	1	1	1	0	1	1	7	3	0	1	1	1	1	1	5	1	0	1	1	1	4	0	1	1	1	0	1	1	5	1	0	0	0	0	2
1	2	2	1	1	1	1	1	0	0	1	1	1	1	1	1	1	0	0	0	0	5	5	0	0	1	1	1	1	4	1	1	1	1	1	5	1	1	0	0	0	1	0	3	1	1	0	0	0	3
0	1	3	1	1	1	0	0	0	0	1	1	1	1	1	1	1	0	0	1	1	7	3	0	1	1	1	1	1	5	1	1	1	1	1	5	1	1	1	1	1	1	0	6	1	1	0	0	0	1
1	3	3	1	1	0	0	0	0	1	0	1	1	1	0	1	0	0	0	0	1	4	3	0	1	1	1	1	1	5	1	1	0	1	1	4	1	1	0	1	0	1	0	4	1	0	0	0	0	3
1	1	3	2	1	1	0	1	0	0	0	1	1	0	0	1	0	0	0	0	0	2	3	0	1	1	0	1	1	4	0	1	0	1	1	3	1	1	0	0	1	1	1	5	1	0	0	0	0	2
1	2	2	1	1	1	1	1	1	1	0	1	1	1	0	1	1	1	0	1	1	7	3	0	1	1	1	1	1	5	1	0	0	1	1	3	1	1	1	0	1	1	0	5	1	1	0	0	0	1
0	1	3	1	1	1	0	0	0	1	1	1	1	1	0	1	1	1	1	1	1	8	3	0	1	1	1	1	1	5	1	1	1	1	1	5	1	1	1	1	0	1	1	6	1	0	0	0	0	1
1	4	3	2	2	0	1	0	0	0	0	0	1	1	0	0	0	1	0	1	1	5	3	1	1	0	1	1	1	5	1	0	0	1	1	3	1	1	0	0	1	1	1	5	1	1	0	0	0	6
0	1	3	1	1	0	1	0	0	1	0	1	1	1	1	1	1	0	0	1	0	6	0	0	1	1	0	1	1	4	1	1	0	1	1	4	1	1	0	0	1	1	0	4	1	1	0	0	0	1
0	4	2	1	1	0	1	1	0	1	1	0	1	1	0	1	1	0	0	0	1	5	0	1	1	1	0	0	1	4	1	1	1	1	1	5	1	1	0	0	1	1	1	5	1	0	0	0	0	2
1	2	3	2	1	1	1	1	0	1	0	0	1	1	0	1	1	0	1	0	1	6	3	0	1	1	1	1	1	5	1	1	0	1	1	4	1	1	0	0	1	1	1	5	1	0	0	0	0	4
0	2	3	0	1	1	0	0	0	0	0	1	1	1	1	1	1	1	1	1	1	9	3	1	1	1	0	0	1	4	1	1	1	1	1	5	1	1	0	0	1	1	1	5	1	1	0	0	0	1
1	2	2	2	1	0	0	0	0	1	0	1	1	1	0	1	1	0	0	0	0	4	0	0	1	1	1	1	1	5	1	1	1	1	1	5	1	1	0	0	1	1	0	4	1	0	0	0	0	1
0	1	3	1	1	1	0	1	0	1	0	1	1	1	0	1	1	0	0	1	1	6	3	0	1	1	1	0	1	4	0	1	0	1	1	3	1	1	0	1	0	1	0	4	1	0	1	0	0	1
0	2	3	1	1	1	0	1	0	0	1	1	1	1	0	1	1	1	0	1	0	6	3	0	1	1	1	1	1	5	1	1	0	1	1	4	1	1	0	0	1	1	1	5	1	1	0	0	0	1
0	1	3	1	1	0	0	0	1	1	0	1	1	1	0	1	0	1	0	1	0	5	1	1	1	1	1	1	1	6	1	1	1	1	1	5	1	1	0	0	1	1	0	4	1	1	0	0	0	1
1	3	3	2	2	1	0	0	0	1	0	1	1	1	0	1	1	1	1	1	1	8	3	0	1	1	1	1	1	5	0	1	0	1	1	3	1	1	0	0	0	1	0	3	1	0	0	0	0	2
0	1	3	1	2	0	0	0	0	1	0	0	1	0	0	1	0	0	0	0	1	3	0	0	0	1	0	1	1	3	0	1	0	1	1	3	1	1	0	0	1	1	1	5	0	0	0	0	1	3
0	2	2	2	2	1	0	0	0	1	0	1	1	1	0	1	0	0	0	1	0	4	0	0	1	1	1	1	1	5	1	1	1	1	1	5	1	1	0	0	1	1	1	5	1	1	1	0	0	6
0	1	2	2	0	1	0	0	1	1	0	1	1	1	0	1	0	1	0	0	0	4	3	0	1	1	1	1	1	5	1	1	1	1	1	5	1	1	0	0	0	1	0	3	1	1	0	0	0	1
1	1	3	1	1	1	1	1	0	1	0	1	1	1	0	1	1	0	0	1	0	5	0	0	1	1	1	1	1	5	1	1	1	1	1	5	1	1	0	0	1	1	1	5	1	1	0	0	0	1
1	2	3	2	2	1	1	0	0	0	0	0	1	1	0	1	0	1	0	1	1	6	0	1	1	1	1	1	1	6	1	1	1	1	1	5	1	1	1	1	0	1	1	6	1	1	0	0	0	1
1	4	3	1	2	0	0	0	0	1	0	0	1	0	0	1	1	0	0	0	1	4	3	0	0	0	1	0	0	1	1	0	1	1	1	4	0	1	0	0	1	0	1	3	1	1	1	0	0	7
1	3	2	1	1	1	0	0	0	0	0	1	1	1	1	1	0	1	0	1	1	7	3	0	1	1	1	1	1	5	1	1	1	1	1	5	1	1	0	0	1	1	1	5	1	1	0	0	0	7
0	1	3	1	1	0	0	1	0	1	0	1	1	1	0	1	0	1	0	0	0	4	3	0	1	1	1	1	1	5	1	1	0	1	1	4	1	1	0	0	1	1	1	5	1	1	0	0	0	1
1	2	3	2	2	0	0	1	1	1	0	1	1	1	0	1	1	1	0	1	1	7	3	0	1	1	1	1	1	5	1	0	1	1	1	4	1	1	1	1	0	1	0	5	1	1	0	0	0	1
0	3	3	2	2	0	0	1	0	0	0	1	0	0	0	1	0	0	0	0	1	2	8	0	1	1	1	1	1	5	1	1	1	1	1	5	0	0	0	0	0	1	0	1	1	1	1	0	0	1
1	2	3	1	1	1	0	0	0	1	0	1	1	1	1	1	1	1	1	1	1	9	3	0	1	1	1	1	1	5	1	1	1	1	1	5	1	1	1	1	1	1	1	7	1	0	0	0	0	1
0	2	3	1	1	1	1	0	0	0	0	1	1	1	1	1	1	1	1	1	1	9	3	1	1	1	1	1	1	6	1	1	1	1	1	5	0	0	1	0	0	1	0	2	1	1	0	0	0	5
1	2	2	2	2	1	1	0	0	0	0	1	1	1	1	1	1	1	0	1	0	7	3	0	1	1	0	1	1	4	1	1	1	1	1	5	1	1	0	0	1	1	1	5	1	0	1	0	0	1
1	2	3	0	2	1	1	1	0	1	0	0	1	1	0	1	1	1	0	1	0	6	0	0	1	1	1	1	1	5	1	1	0	1	1	4	1	1	0	0	1	1	1	5	1	1	0	0	0	2
0	2	2	1	1	1	0	0	0	0	0	0	1	0	1	1	1	0	0	0	1	5	3	0	1	1	0	1	1	4	1	1	1	1	0	4	1	1	0	1	1	1	0	5	1	1	0	0	0	6
0	3	3	2	1	1	1	1	0	1	0	0	1	1	0	1	1	0	1	1	1	7	3	0	1	1	1	1	1	5	1	1	0	1	1	4	1	1	0	0	1	1	1	5	1	1	0	0	0	1
0	2	3	2	1	0	0	0	0	1	0	0	1	0	0	1	1	0	0	1	0	4	3	0	1	1	1	1	1	5	1	0	0	1	1	3	1	1	0	0	1	1	1	5	1	0	0	0	0	1
0	2	3	1	1	1	1	0	0	0	0	1	1	1	1	1	0	1	0	0	1	6	0	0	1	0	1	1	1	4	1	1	1	1	1	5	0	0	1	0	1	1	1	4	0	0	1	0	0	1
0	2	3	1	1	0	0	0	1	0	0	1	1	1	0	1	1	0	0	1	0	5	3	0	1	1	1	1	1	5	1	1	1	1	1	5	1	1	1	1	1	1	0	6	1	1	0	0	0	1
1	2	3	2	1	1	0	0	0	1	0	1	1	0	0	1	0	1	1	0	0	4	3	0	0	1	1	1	1	4	1	1	1	1	1	5	1	1	0	0	1	1	1	5	1	1	0	0	0	1
0	1	3	2	1	1	0	0	0	1	0	1	1	1	1	1	0	0	0	0	1	5	3	1	0	0	1	1	1	4	1	1	1	1	1	5	1	0	0	0	1	1	1	4	1	1	1	0	0	1
0	1	3	1	1	0	0	1	0	1	0	1	1	1	0	1	1	0	0	1	1	6	0	1	0	1	1	1	0	4	0	1	1	1	1	4	0	1	0	1	1	1	1	5	1	0	0	0	0	1
0	1	3	1	1	0	0	0	0	0	0	1	1	1	0	1	1	1	0	0	1	6	3	0	1	1	0	1	1	4	1	1	1	1	1	5	1	1	0	0	1	1	1	5	1	1	1	0	0	1
0	3	3	1	1	1	0	0	1	1	0	0	1	1	0	1	0	0	0	1	1	5	0	0	1	1	0	1	1	4	1	1	1	1	1	5	1	1	0	1	1	1	0	5	1	1	0	0	0	2
0	3	3	1	1	1	1	1	1	1	1	1	1	1	0	1	1	0	1	1	1	7	3	0	1	1	1	1	1	5	1	1	1	1	1	5	1	1	0	0	1	1	1	5	1	0	0	0	0	1
0	4	3	1	1	0	0	1	0	1	0	1	1	0	0	1	1	1	0	1	1	6	0	1	0	1	1	1	1	5	1	1	1	1	1	5	0	1	0	1	0	1	0	3	1	1	0	0	0	1
1	1	3	1	1	1	1	1	0	0	0	1	1	1	1	0	1	1	0	1	1	7	2	0	1	1	1	1	1	5	0	1	1	1	1	4	1	0	0	0	1	1	0	3	1	0	1	0	1	2
1	1	3	0	2	1	0	0	0	0	0	1	1	1	1	0	0	0	0	1	0	4	0	0	1	1	0	1	1	4	1	1	1	1	1	5	1	1	0	0	1	1	1	5	1	0	0	0	0	3
0	1	2	2	1	1	0	0	0	1	0	1	1	1	0	1	1	1	1	1	1	8	0	1	1	1	0	0	1	4	1	1	1	1	1	5	1	1	0	0	1	1	1	5	1	0	0	0	0	1
0	2	3	1	1	1	1	1	0	1	0	1	1	1	1	1	1	1	1	1	1	9	3	0	0	0	1	1	1	3	1	1	1	1	1	5	1	1	1	0	0	1	0	4	1	1	0	0	0	2
0	3	3	1	1	1	1	1	0	0	0	0	1	1	1	1	1	1	0	1	1	8	0	1	1	1	1	1	1	6	1	1	1	1	1	5	0	1	0	0	0	1	0	2	1	0	0	0	0	2
0	2	3	0	2	1	0	0	0	0	0	0	1	0	0	1	0	1	0	0	0	3	2	0	1	0	1	1	1	4	0	1	1	0	0	2	0	0	0	0	1	1	0	2	1	0	0	0	0	2
1	1	2	2	1	1	0	0	0	1	1	1	1	1	0	1	1	0	1	1	0	6	3	0	1	1	0	1	1	4	1	1	0	1	1	4	0	1	1	1	1	1	1	6	1	1	0	0	0	1
1	2	2	2	2	0	0	1	0	0	1	1	1	1	0	0	0	1	0	1	0	4	6	1	1	1	0	0	1	4	1	1	1	1	1	5	1	1	1	1	1	1	1	7	1	0	0	0	0	2
1	2	2	2	2	0	1	0	0	0	0	1	1	1	0	0	0	0	0	0	0	2	3	0	0	1	0	1	1	3	1	1	0	1	1	4	1	0	0	0	1	1	1	4	0	0	1	0	0	1
1	0	2	1	1	0	0	0	0	1	0	0	1	1	1	1	0	1	0	0	0	5	3	0	0	0	1	1	1	3	1	0	1	1	1	4	1	0	0	0	1	1	0	3	1	1	1	1	0	6
0	1	0	1	1	1	0	0	0	0	0	0	1	0	0	1	0	1	0	0	0	3	3	1	1	1	0	1	1	5	1	1	1	1	1	5	1	0	0	0	1	1	1	4	1	0	0	0	0	1
1	2	3	1	1	1	0	0	0	0	0	1	1	1	1	1	1	1	0	0	1	7	3	0	1	1	1	1	1	5	1	1	1	1	1	5	1	1	1	0	1	1	1	6	1	1	1	0	0	1
1	2	3	1	1	1	0	0	0	0	0	1	1	1	1	1	1	1	0	0	1	7	3	0	1	1	1	1	1	5	1	1	1	1	1	5	1	1	1	0	1	1	1	6	1	1	1	0	0	1
0	2	3	1	1	0	0	1	0	1	0	1	1	1	0	1	1	1	0	1	1	7	0	0	1	1	1	1	1	5	1	1	0	1	1	4	1	1	0	0	1	1	1	5	1	1	1	0	0	1
1	1	3	1	1	0	0	0	0	0	0	1	0	0	0	1	0	0	0	0	0	1	0	0	1	0	1	1	0	3	0	1	1	1	0	3	1	1	1	0	1	1	1	6	1	0	0	0	0	1
0	3	3	2	2	1	0	0	0	0	0	0	1	1	0	1	1	1	0	0	0	5	3	0	1	1	1	1	1	5	1	1	1	1	1	5	0	1	0	0	0	1	0	2	1	0	0	0	0	1
1	2	3	1	1	1	1	0	0	1	1	1	1	1	1	1	1	1	1	0	1	8	0	1	1	1	1	1	1	6	1	1	1	1	1	5	1	1	1	1	0	1	1	6	1	1	1	0	0	4
1	1	3	1	1	0	0	0	0	0	0	1	1	1	1	1	1	0	0	1	1	7	8	0	1	0	1	1	1	4	1	0	0	1	1	3	1	1	0	0	1	1	1	5	1	0	0	0	0	4
0	1	3	1	1	1	0	0	0	0	0	1	1	1	0	1	1	1	0	1	0	6	3	0	1	1	1	0	1	4	1	1	0	1	1	4	1	1	0	0	1	1	1	5	1	1	0	0	0	2
0	1	3	1	1	0	0	0	0	0	0	1	1	1	1	1	1	1	1	1	1	9	3	1	1	1	1	1	1	6	1	1	1	1	1	5	1	1	0	0	1	1	1	5	1	0	0	0	0	1
1	3	3	0	1	1	0	0	0	0	0	1	1	1	0	0	1	0	1	1	1	6	1	0	0	1	1	1	1	4	1	1	1	1	1	5	1	1	0	1	1	1	1	6	1	1	0	0	0	1
0	1	2	1	1	0	1	0	0	1	0	1	1	0	0	0	1	0	0	0	0	2	3	1	1	1	0	0	1	4	1	0	0	1	1	3	1	1	0	0	1	1	1	5	0	0	0	0	1	1
1	2	3	1	1	0	0	0	1	0	0	1	1	1	1	1	1	1	1	1	1	9	3	1	1	1	1	1	1	6	1	1	1	1	1	5	1	1	0	0	1	1	0	4	1	1	0	0	0	1
1	3	3	1	1	1	1	0	0	0	0	0	1	1	0	1	0	0	0	0	0	3	3	0	0	1	1	1	1	4	1	0	0	1	1	3	0	1	0	0	1	1	0	3	1	0	0	0	0	6
1	0	2	2	1	0	0	0	0	1	0	1	1	1	0	1	1	1	0	0	1	6	5	0	1	1	1	1	1	5	1	1	0	1	1	4	1	1	0	0	1	1	1	5	1	1	0	0	0	1
1	1	2	2	0	1	1	0	0	0	0	0	1	1	1	1	0	0	0	0	0	4	0	1	0	0	1	1	1	4	1	0	1	0	1	3	1	1	0	0	0	1	1	4	1	0	1	0	0	2
1	2	2	2	1	1	0	0	0	0	0	0	1	1	1	1	1	1	0	1	1	8	3	0	0	0	1	1	1	3	1	1	1	1	1	5	1	1	0	0	1	1	1	5	1	0	0	0	0	3
1	4	3	2	2	1	1	0	0	0	1	0	1	1	0	1	0	1	0	1	1	6	3	0	1	1	1	1	1	5	1	0	0	1	1	3	1	1	0	0	1	1	1	5	1	0	1	0	0	1
1	3	3	1	1	0	1	0	0	0	0	1	1	0	0	1	0	1	0	0	0	3	3	0	1	1	1	1	0	4	0	0	0	1	1	2	0	1	0	0	0	1	0	2	1	0	0	0	0	1
1	1	3	2	2	0	0	0	0	0	0	1	1	1	0	1	1	0	0	0	0	4	3	0	1	1	1	1	1	5	1	0	0	1	1	3	1	1	0	0	1	1	1	5	1	1	0	0	0	1
0	1	2	1	1	1	1	1	0	1	1	1	1	1	0	1	0	1	1	1	0	6	3	0	1	1	0	1	1	4	1	1	1	1	1	5	1	1	0	0	1	1	1	5	1	0	0	0	0	1
1	2	2	1	1	1	0	0	0	0	1	1	1	1	1	1	0	0	0	0	1	5	3	0	1	1	1	1	1	5	1	0	0	1	1	3	0	1	0	1	0	1	0	3	1	0	1	0	0	4
1	1	2	1	1	0	0	1	0	1	0	0	1	1	0	1	0	0	0	1	1	5	1	1	1	1	1	1	1	6	1	1	0	1	1	4	1	1	0	0	1	1	1	5	1	0	0	0	0	1
1	5	2	1	1	1	1	1	0	0	1	1	1	1	1	1	1	1	0	1	1	8	3	0	1	1	1	0	1	4	1	1	1	1	1	5	0	1	0	1	0	1	0	3	1	1	1	0	0	2
0	1	3	1	1	1	0	1	0	1	0	1	1	1	1	1	0	1	0	0	1	6	3	0	1	1	1	1	1	5	1	1	1	1	1	5	0	1	1	1	1	1	0	5	1	1	1	0	0	1
1	4	3	2	1	0	0	0	0	1	0	1	1	1	0	1	0	0	0	0	1	4	3	0	1	1	1	1	1	5	0	1	0	1	1	3	1	1	0	0	1	1	1	5	1	0	1	0	0	1
1	1	3	1	1	0	0	0	0	1	0	0	1	1	0	1	0	0	0	1	1	5	3	0	1	1	1	1	1	5	1	1	0	1	1	4	1	1	0	0	1	1	1	5	1	0	0	0	0	1
0	1	2	2	1	1	0	0	0	0	0	0	1	0	1	1	1	0	0	1	0	5	3	0	1	0	1	1	1	4	1	1	0	1	0	3	1	1	0	0	1	1	1	5	1	0	0	0	0	1
1	1	3	2	1	1	1	1	1	1	0	1	1	1	0	1	1	1	1	1	0	7	3	0	1	1	1	1	1	5	1	1	1	1	1	5	1	1	1	1	1	1	1	7	1	1	0	0	0	1
0	0	2	1	1	0	0	0	0	1	0	0	1	1	0	1	1	0	1	1	0	6	0	0	1	1	1	1	1	5	1	1	1	1	1	5	1	1	0	0	1	1	1	5	1	0	1	0	0	1
1	1	3	2	1	1	0	0	0	0	0	1	1	1	0	1	1	1	1	1	0	7	3	1	1	1	0	0	1	4	1	1	1	1	1	5	1	1	1	1	0	1	0	5	1	1	0	1	0	0
0	1	3	1	1	1	1	1	1	1	0	0	1	1	0	1	1	0	0	1	0	5	0	0	1	1	1	1	1	5	1	1	1	1	1	5	1	1	0	0	1	1	1	5	1	1	0	1	0	1
1	1	3	2	1	1	0	0	0	1	0	1	1	1	1	1	0	1	0	0	1	6	3	0	1	1	0	0	1	3	1	1	1	1	1	5	1	1	0	0	1	1	1	5	1	1	1	0	0	1
0	1	2	1	1	0	0	0	0	1	0	1	1	1	1	1	1	0	0	0	0	5	3	0	1	1	1	1	1	5	1	1	1	1	1	5	1	0	0	1	1	1	0	4	1	0	0	0	0	1
1	1	3	1	1	1	0	0	1	1	0	1	1	1	1	1	1	0	0	0	1	6	3	0	1	1	1	1	1	5	1	1	1	1	1	5	1	1	1	1	1	1	0	6	1	1	0	0	0	1
0	5	1	2	0	1	1	1	0	0	1	0	1	1	1	1	1	1	0	1	1	8	3	0	1	1	1	1	1	5	1	1	1	1	1	5	0	1	0	0	0	1	0	2	1	0	0	0	0	3
0	1	3	1	1	0	0	0	0	0	0	1	1	1	0	1	0	1	0	0	0	4	0	0	0	1	1	1	1	4	1	1	1	1	1	5	0	1	0	0	1	1	0	3	0	0	1	0	0	1
1	1	3	2	2	0	0	0	0	0	0	1	1	1	0	1	1	1	1	1	1	8	3	0	0	0	1	1	1	3	1	1	1	1	1	5	1	1	1	0	0	0	0	3	1	1	1	0	0	1
1	1	3	1	1	1	0	0	0	1	0	1	1	1	1	1	1	1	1	1	1	9	0	0	1	1	1	1	1	5	1	1	1	1	1	5	1	1	1	1	0	1	0	5	1	1	1	0	0	3
0	1	2	2	1	0	0	0	0	1	0	1	1	1	0	1	0	0	0	0	0	3	0	0	1	1	1	1	1	5	1	1	1	1	1	5	1	1	0	0	1	1	1	5	1	0	1	0	0	1
1	1	3	1	1	1	0	0	0	0	0	1	1	1	1	1	1	0	1	1	1	8	3	0	1	1	1	1	1	5	1	1	1	1	1	5	1	1	1	1	1	1	0	6	1	0	1	0	0	1
0	1	2	2	1	0	0	0	0	1	0	1	1	1	0	1	0	0	0	0	0	3	0	0	1	1	1	1	1	5	1	1	1	1	1	5	1	1	0	0	1	1	1	5	1	0	1	0	0	1
0	1	3	1	1	0	0	0	0	0	0	1	1	1	0	1	1	0	0	0	0	4	3	0	1	1	1	1	1	5	1	1	1	1	1	5	1	1	0	0	1	1	1	5	1	1	0	0	0	1
1	1	3	1	1	0	0	0	0	1	0	1	1	1	1	1	1	1	1	1	1	9	3	0	1	1	0	1	1	4	1	1	1	1	1	5	1	1	1	1	1	1	0	6	1	1	0	0	0	1
1	1	2	1	1	0	0	0	0	0	0	1	1	1	0	1	1	1	0	1	0	6	3	0	1	1	1	1	1	5	1	1	1	1	1	5	1	1	1	1	0	1	1	6	1	0	0	0	1	2
1	1	3	2	2	1	1	1	0	1	0	1	1	1	0	1	0	1	0	0	0	4	0	0	1	1	1	1	1	5	1	1	1	1	1	5	1	1	0	0	1	1	1	5	1	0	0	0	0	1
0	2	3	1	1	0	0	0	0	0	0	1	0	1	1	1	1	1	0	1	1	7	3	0	0	0	1	1	1	3	1	1	1	1	1	5	1	1	0	1	1	1	0	5	1	0	0	0	0	2
0	1	2	2	2	1	0	0	0	1	0	1	1	1	0	1	1	0	0	0	0	4	3	1	1	1	1	1	1	6	1	1	1	1	1	5	1	1	0	0	1	1	1	5	1	1	0	0	0	1
1	4	3	2	1	0	0	1	1	1	0	1	1	1	1	1	1	1	1	1	1	9	3	0	1	1	0	0	1	3	1	1	1	1	1	5	1	1	0	0	1	1	1	5	1	1	1	1	0	2
1	2	3	1	1	0	0	0	0	1	0	1	1	1	0	1	1	0	0	0	0	4	0	1	1	1	0	1	1	5	1	0	1	1	1	4	1	1	1	0	1	1	0	5	1	1	1	0	0	4
1	1	3	1	1	1	0	0	0	0	0	1	1	1	0	1	1	0	0	1	0	5	3	0	1	1	1	1	1	5	1	0	0	1	1	3	1	1	0	0	1	1	0	4	1	0	0	0	0	1
0	1	2	1	1	1	0	0	0	0	0	1	1	1	0	1	1	0	0	1	1	6	1	0	1	1	1	1	1	5	1	1	1	1	1	5	1	1	0	0	1	1	1	5	1	1	0	0	0	2
1	1	3	2	2	1	0	0	0	0	0	1	1	1	1	1	0	0	0	0	0	4	3	1	1	1	1	1	1	6	1	1	1	1	1	5	1	1	1	1	1	1	0	6	1	1	0	0	0	1
1	1	2	2	2	1	1	0	0	1	0	0	1	1	0	1	1	0	0	1	1	6	3	0	1	1	0	1	1	4	1	0	0	1	1	3	1	1	0	0	1	1	1	5	1	1	0	0	0	1
1	1	2	2	2	0	0	0	0	1	0	1	1	1	1	1	1	1	0	1	1	8	3	0	1	1	1	1	1	5	1	0	0	1	1	3	1	1	0	1	1	1	1	6	1	1	0	0	0	1
1	4	3	1	1	0	0	0	0	0	0	1	1	0	0	1	0	0	0	0	1	3	3	0	1	0	1	1	1	4	1	1	1	1	1	5	1	1	0	0	1	1	1	5	1	0	0	0	0	1
0	2	3	1	1	0	0	0	0	0	0	1	1	1	0	1	0	0	0	0	0	3	1	0	1	1	1	1	1	5	1	1	1	1	1	5	1	1	0	0	1	1	1	5	1	1	1	0	0	2
1	1	3	1	1	0	0	0	0	1	0	1	1	1	0	1	1	0	0	0	0	4	3	0	1	1	0	1	1	4	1	0	1	1	1	4	0	0	1	1	1	1	1	5	1	1	0	0	0	1
1	2	3	2	2	0	0	1	0	1	0	1	1	1	0	1	1	0	0	0	0	4	3	1	1	1	0	1	1	5	1	0	1	1	1	4	0	1	1	0	1	1	0	4	0	1	1	0	0	4
0	1	2	1	1	1	0	0	1	0	0	0	1	1	1	1	1	1	0	1	1	8	3	1	1	1	1	1	1	6	1	1	1	1	1	5	0	1	1	1	1	1	0	5	1	1	0	1	0	2
1	1	3	1	1	0	0	0	0	1	0	1	1	0	0	1	1	0	0	1	1	5	3	0	1	1	1	1	1	5	1	1	1	1	1	5	0	1	0	1	0	1	0	3	1	1	0	0	0	2
1	1	2	2	1	1	0	0	0	0	1	0	1	1	1	1	1	0	1	1	1	8	0	0	1	1	1	1	1	5	1	1	1	1	1	5	1	1	0	0	1	1	1	5	1	0	1	0	0	2
0	0	2	1	1	1	0	0	0	1	0	1	1	1	1	1	1	0	0	1	0	6	0	0	1	1	1	1	1	5	0	1	1	1	1	4	1	0	1	1	1	1	0	5	1	1	0	0	0	1
1	1	3	2	1	0	0	0	0	0	0	1	1	1	0	1	1	1	0	0	0	5	3	1	1	1	0	1	1	5	1	0	1	1	1	4	1	1	1	1	1	1	0	6	1	1	1	0	0	2
1	1	3	2	2	1	0	0	0	1	0	1	1	1	0	1	0	0	0	0	0	3	3	0	1	1	1	1	1	5	1	1	0	1	1	4	1	1	0	0	1	1	1	5	1	1	0	0	0	1
1	0	2	1	1	0	0	1	0	0	0	1	1	1	0	1	1	0	1	1	0	6	3	0	1	1	0	1	1	4	1	1	0	1	1	4	1	1	0	0	1	1	1	5	1	0	0	0	0	1
1	2	3	1	1	1	0	1	0	0	0	0	1	1	0	1	1	0	1	0	0	5	3	0	1	0	1	1	0	3	1	0	1	1	0	3	0	1	1	1	1	1	0	5	1	1	0	0	0	1
1	1	2	2	1	1	0	1	0	1	1	1	1	1	1	0	0	1	0	0	0	4	0	0	0	1	1	1	1	4	1	1	1	1	1	5	0	1	1	0	0	0	1	3	0	1	0	0	0	3
1	1	3	1	1	0	0	0	0	0	0	1	1	1	0	1	0	1	0	0	1	5	3	1	1	1	0	1	1	5	1	1	1	1	1	5	1	1	0	0	0	1	0	3	1	1	0	0	0	2
1	1	3	1	1	0	0	1	0	1	0	1	1	1	0	1	1	0	0	0	0	4	3	0	1	1	0	1	1	4	1	1	1	1	1	5	1	1	0	0	1	1	1	5	1	0	0	0	0	1
1	1	3	2	1	1	1	0	0	1	0	1	1	1	0	1	0	1	0	0	1	5	3	1	1	1	1	1	1	6	1	0	1	1	1	4	1	1	1	1	1	1	1	7	1	1	0	0	0	1
1	2	3	1	1	1	1	1	0	0	0	1	1	1	1	1	1	1	0	1	1	8	3	0	1	1	1	1	1	5	1	1	1	1	1	5	1	1	1	1	1	1	0	6	1	1	1	0	0	4
0	2	3	1	1	0	0	0	0	0	0	1	1	0	1	0	1	0	0	0	0	3	2	0	1	1	1	1	0	4	1	0	0	1	1	3	1	1	0	0	1	1	1	5	0	1	0	0	0	1
0	1	2	1	2	1	0	1	1	1	0	1	1	1	1	1	1	1	1	1	1	9	2	0	1	1	0	0	1	3	1	1	1	1	1	5	1	1	0	0	1	1	0	4	1	1	1	1	0	1
1	1	3	1	1	1	1	1	0	0	0	1	1	1	0	1	0	0	0	0	0	3	0	1	1	1	1	1	1	6	1	1	1	1	1	5	1	0	0	0	1	1	0	3	1	1	0	0	0	3
1	1	2	2	2	1	0	1	1	0	0	1	1	1	0	1	1	1	0	0	0	5	0	0	1	1	1	1	1	5	0	1	0	1	1	3	1	1	1	0	1	1	0	5	1	0	1	0	0	4
1	4	3	2	1	1	0	0	0	0	0	0	1	1	0	1	0	0	1	1	1	6	3	0	1	1	1	1	1	5	1	0	0	1	1	3	1	1	1	0	0	1	0	4	0	0	0	0	1	1
1	1	3	1	1	1	0	0	0	1	0	1	1	1	0	1	0	0	1	0	1	5	3	1	1	1	1	1	1	6	1	1	1	1	1	5	0	1	0	1	0	1	0	3	1	1	0	0	0	1
1	1	3	2	1	1	0	0	0	0	0	1	1	1	0	1	1	1	0	0	0	5	3	1	1	1	1	1	1	6	1	1	1	1	1	5	1	0	0	0	1	1	1	4	1	0	0	0	0	1
1	1	3	2	2	0	0	0	0	1	0	1	1	1	0	1	1	0	1	1	0	6	0	0	1	1	1	1	1	5	1	1	1	1	1	5	1	1	0	0	1	1	1	5	1	1	0	0	0	2
1	4	3	1	1	0	1	1	0	1	0	1	1	1	0	1	1	0	0	1	0	5	3	0	1	1	1	1	1	5	1	0	1	1	1	4	1	1	0	0	0	1	0	3	1	1	0	0	0	1
0	3	3	2	2	1	1	1	0	0	1	1	1	1	0	1	1	0	0	0	0	4	4	0	0	1	0	1	1	3	1	1	1	1	1	5	1	1	0	0	0	1	0	3	1	1	0	0	0	1
0	2	2	2	2	1	0	1	0	1	0	0	1	1	1	1	1	1	1	1	1	9	0	0	1	1	1	1	1	5	1	1	1	1	1	5	1	1	0	0	1	1	1	5	1	0	1	0	0	3
1	1	3	1	1	0	0	0	0	1	0	1	1	0	1	1	0	0	1	0	0	4	3	0	1	1	1	1	1	5	1	0	1	1	0	3	1	1	0	0	1	1	1	5	1	0	1	0	0	2
0	1	3	1	1	1	0	0	0	1	0	1	1	1	1	1	1	0	0	1	0	6	3	1	1	1	0	1	1	5	1	1	1	1	1	5	1	1	0	0	1	1	1	5	1	0	0	0	0	2
1	4	3	2	1	1	1	1	0	1	0	0	1	1	1	1	1	1	0	0	0	6	3	0	1	1	1	1	1	5	1	1	1	1	1	5	1	1	1	1	1	1	0	6	1	1	0	0	0	2
1	1	3	1	1	0	0	0	0	0	0	1	1	0	0	1	1	0	0	0	0	3	3	0	1	1	1	1	1	5	1	1	1	1	1	5	1	1	0	0	1	1	1	5	1	0	0	0	1	1
0	1	2	1	1	1	0	0	0	1	0	1	1	1	0	1	1	0	0	1	0	5	3	0	1	1	1	1	1	5	1	0	1	1	1	4	1	1	1	0	1	1	1	6	1	1	1	0	0	1
1	1	3	1	1	1	0	0	0	1	1	0	1	1	0	1	1	1	1	1	1	8	3	0	1	1	1	1	0	4	1	0	1	1	1	4	0	0	1	1	0	1	1	4	1	1	0	0	0	2
0	1	2	2	1	1	0	0	0	0	0	0	1	1	1	1	0	0	0	1	0	5	3	0	1	1	1	1	1	5	1	1	1	1	1	5	1	1	0	0	1	1	1	5	1	1	0	0	0	1
1	0	2	1	1	0	0	0	0	0	0	1	0	1	0	0	0	0	0	0	0	1	1	0	0	1	1	1	0	3	0	0	0	1	0	1	1	1	0	0	1	1	1	5	0	0	0	1	0	3
1	1	2	1	1	1	0	0	0	0	0	1	1	1	1	1	1	1	0	0	1	7	5	0	1	1	1	1	1	5	1	1	1	1	1	5	1	1	0	0	1	1	1	5	0	0	0	0	1	2
0	1	3	1	1	1	0	0	0	0	0	1	1	1	0	1	0	0	0	0	0	3	3	0	1	1	1	1	1	5	1	1	1	1	1	5	1	1	0	0	1	1	1	5	1	1	0	0	0	1
1	2	3	1	1	1	0	0	0	1	0	1	1	1	1	1	1	1	1	1	1	9	3	0	1	1	1	1	1	5	1	1	1	1	1	5	1	1	0	0	1	1	1	5	1	1	0	0	0	1
1	2	3	2	1	1	0	0	0	0	0	1	1	1	1	1	1	1	0	1	0	7	3	0	1	1	1	1	1	5	1	1	1	0	1	4	1	1	1	0	0	1	0	4	1	0	1	0	0	5
0	1	3	2	2	0	0	0	0	1	0	0	1	1	0	1	1	0	0	0	0	4	3	0	1	1	1	1	1	5	0	1	0	1	1	3	1	1	0	0	1	1	1	5	1	0	1	0	0	1
1	2	3	2	1	1	0	0	0	0	0	0	1	1	0	1	1	0	0	1	1	6	3	1	1	1	0	1	1	5	1	0	1	1	0	3	0	1	0	1	1	1	1	5	1	0	0	0	0	2
1	1	3	1	1	0	1	0	0	0	0	1	1	1	1	1	1	1	0	1	1	8	3	1	1	1	0	0	1	4	1	1	1	1	1	5	1	1	0	0	1	1	1	5	1	0	0	0	0	3
1	1	2	0	2	1	1	0	0	0	0	1	1	1	0	1	0	0	0	1	0	4	3	0	0	1	0	1	1	3	0	1	1	1	1	4	1	1	0	0	1	1	1	5	1	1	0	0	0	1
1	2	3	1	1	1	1	0	0	0	0	1	1	1	1	1	1	1	0	1	1	8	3	0	0	1	1	1	1	4	1	0	1	1	1	4	1	1	0	0	1	1	1	5	1	0	0	0	0	1
1	2	3	2	2	1	0	0	0	1	0	1	1	1	0	1	0	0	0	1	0	4	3	0	1	1	1	1	1	5	1	1	1	1	1	5	1	1	0	0	1	1	1	5	1	1	0	0	0	1
1	1	3	2	1	1	0	0	0	0	1	1	1	1	0	1	1	1	0	1	0	6	0	0	1	0	1	1	1	4	1	1	1	1	1	5	1	1	0	1	1	1	1	6	1	1	1	0	0	1
1	4	3	1	1	0	0	0	0	0	0	1	1	1	0	1	0	1	0	0	0	4	3	0	1	1	1	1	1	5	1	1	0	1	1	4	1	1	0	0	1	1	1	5	1	1	0	0	0	1
0	2	3	2	2	0	0	1	1	1	0	1	1	1	0	1	1	1	0	1	0	6	3	0	1	1	0	1	1	4	1	1	1	1	1	5	1	0	0	1	1	1	0	4	1	1	0	1	0	1
1	2	3	1	1	1	0	1	0	1	0	0	1	1	1	1	1	1	0	1	0	7	3	0	1	1	1	1	1	5	1	1	1	1	1	5	0	1	0	1	1	1	0	4	0	0	1	0	0	1
1	1	3	2	1	1	1	1	1	1	1	1	1	1	1	1	1	1	1	1	1	9	3	1	1	1	0	0	1	4	1	1	1	1	1	5	1	0	1	0	1	1	1	5	1	1	1	0	0	1
1	1	2	2	1	0	0	0	0	0	0	1	1	1	0	1	1	0	0	0	1	5	0	0	0	0	1	1	1	3	1	1	1	1	0	4	0	1	0	1	1	1	0	4	1	0	1	0	0	2
0	2	3	2	2	0	0	0	0	0	0	1	1	1	0	1	0	1	0	1	1	6	8	0	1	1	1	1	1	5	1	1	1	1	1	5	1	1	0	0	1	1	1	5	1	1	0	0	0	1
1	5	3	2	2	1	1	0	0	0	0	0	1	1	0	0	0	0	0	0	0	2	3	0	1	1	1	1	1	5	1	1	0	1	1	4	1	1	0	1	1	1	0	5	1	0	0	0	0	1
1	1	3	1	1	1	0	0	0	0	1	1	1	1	0	1	1	1	0	0	0	5	3	0	1	1	1	1	1	5	1	0	0	1	1	3	0	1	1	0	1	1	0	4	1	1	1	0	0	2
1	1	2	1	1	1	1	1	1	1	1	1	1	1	1	1	1	1	1	1	1	9	3	1	1	1	1	1	1	6	1	0	1	1	1	4	1	1	1	1	1	1	1	7	1	1	0	0	1	1
1	1	3	1	1	1	1	1	0	1	1	1	1	0	0	1	1	1	0	0	0	4	3	1	0	1	1	1	1	5	1	1	1	1	1	5	0	1	1	0	1	1	0	4	1	1	0	0	0	1
0	1	2	2	1	0	0	0	0	0	0	1	1	1	0	1	1	0	0	1	1	6	3	0	1	1	1	1	1	5	1	1	1	1	1	5	1	1	0	0	1	1	1	5	1	1	0	0	0	1
1	1	2	2	2	1	1	0	0	0	0	1	1	1	0	1	1	0	1	1	0	6	3	0	0	0	1	1	1	3	1	0	1	1	1	4	0	0	1	1	0	1	1	4	1	0	0	0	0	3
1	3	2	1	1	0	1	0	0	0	0	0	1	0	0	0	0	0	0	0	1	2	8	0	0	1	1	1	0	3	0	0	0	1	0	1	0	1	0	1	1	1	1	5	1	0	0	0	0	3
1	1	3	2	1	1	1	1	1	1	1	1	1	1	0	1	1	1	1	1	1	8	1	0	1	1	0	1	1	4	1	1	1	1	1	5	1	1	1	1	1	1	0	6	1	1	1	1	0	1
1	1	3	2	1	0	0	0	0	1	0	1	1	0	1	1	0	0	0	0	1	4	3	0	1	1	1	1	1	5	1	0	1	1	1	4	1	1	0	0	1	1	0	4	1	1	1	0	0	1
0	2	3	1	1	0	0	0	0	0	0	1	1	0	0	0	0	0	0	0	0	1	3	0	1	1	1	1	1	5	1	1	1	1	1	5	0	1	0	1	0	1	0	3	1	1	1	0	0	1
0	1	2	1	1	1	0	0	0	1	0	1	1	1	0	1	1	0	0	1	1	6	3	0	1	1	1	1	1	5	1	0	0	1	1	3	1	1	0	0	1	1	1	5	1	0	0	0	0	1
1	1	3	2	1	1	0	0	0	0	0	0	1	1	0	1	0	1	0	0	0	4	0	0	1	1	0	1	1	4	1	1	1	1	1	5	1	1	1	0	1	1	0	5	1	1	0	0	0	1
0	1	3	1	1	1	1	0	0	0	0	1	1	1	1	1	1	0	0	1	1	7	3	0	1	1	1	1	1	5	1	1	1	1	1	5	1	1	1	1	1	1	0	6	1	1	0	0	0	1
1	1	3	2	2	1	1	1	1	1	0	1	1	1	1	1	1	1	1	1	0	8	3	0	1	1	1	1	1	5	1	1	0	1	1	4	1	1	0	0	1	1	1	5	1	1	0	0	0	1
1	2	3	1	1	0	1	0	0	1	0	1	1	1	0	1	1	0	0	1	0	5	3	1	1	1	1	1	1	6	1	1	1	1	1	5	1	1	0	0	1	1	1	5	0	1	0	0	0	1
1	0	2	2	1	0	0	1	0	1	0	1	1	1	0	1	1	0	0	1	0	5	3	0	1	0	1	1	1	4	1	1	0	1	1	4	1	1	0	0	1	1	1	5	1	1	0	0	0	0
1	1	0	0	0	1	0	0	0	0	0	0	1	1	0	1	1	0	0	0	0	4	8	0	1	1	1	1	1	5	0	1	1	1	0	3	1	1	0	1	0	1	0	4	1	0	0	0	0	3
1	1	3	1	1	0	0	0	0	0	0	1	1	1	0	0	0	0	0	0	0	2	0	0	1	1	1	1	1	5	0	1	1	1	1	4	0	0	1	0	1	1	0	3	1	0	1	0	0	1
0	2	3	1	1	1	1	1	0	1	0	1	1	1	0	1	0	0	0	0	1	4	3	0	1	1	1	1	1	5	1	0	0	1	1	3	1	1	1	0	1	1	0	5	1	1	0	0	0	1
1	1	3	1	1	0	0	0	0	0	0	1	1	1	0	0	0	0	0	0	0	2	0	0	1	1	1	1	1	5	0	1	1	1	1	4	0	0	1	0	1	1	0	3	1	0	1	0	0	1
1	1	2	1	1	1	1	0	0	0	0	0	1	1	0	1	0	1	0	1	0	5	3	1	1	1	0	0	1	4	1	0	0	1	1	3	1	1	0	0	1	1	1	5	0	0	0	0	1	1
1	1	3	1	1	0	0	0	0	0	0	1	1	1	0	0	0	0	0	0	0	2	0	0	1	1	1	1	1	5	0	1	1	1	1	4	0	0	1	0	1	1	0	3	1	0	1	0	0	1
0	1	3	2	1	0	0	0	0	0	0	1	0	0	0	1	0	0	0	0	0	1	0	0	1	0	1	1	1	4	1	0	0	0	1	2	0	1	0	0	1	1	0	3	0	1	1	0	0	1
1	3	3	2	1	1	1	0	0	0	0	1	1	1	0	0	1	0	0	0	0	3	1	0	1	1	1	1	1	5	1	0	1	1	0	3	0	1	0	1	0	1	1	4	0	0	1	0	0	2
1	1	3	1	1	0	0	0	0	1	0	1	1	1	1	1	1	1	0	1	0	7	3	0	1	1	0	1	1	4	1	1	1	1	1	5	0	0	1	1	1	1	0	4	0	0	0	0	1	1
1	1	3	1	1	1	1	0	0	1	0	1	1	1	0	1	0	0	1	0	0	4	3	0	1	1	1	1	1	5	1	1	1	1	1	5	1	1	0	0	1	1	1	5	1	1	0	0	0	1
1	1	2	2	2	1	1	1	0	1	1	0	1	1	1	1	1	1	0	1	1	8	3	0	1	1	0	1	1	4	1	0	1	1	1	4	1	1	0	1	1	1	1	6	1	1	0	0	0	1
0	1	3	2	1	1	0	0	0	1	0	1	1	1	0	1	1	0	0	1	1	6	3	1	1	1	1	1	1	6	1	1	1	1	1	5	1	1	0	0	1	1	0	4	1	1	1	0	0	1
1	1	3	1	1	1	0	0	0	0	0	0	1	1	1	1	1	1	1	1	1	9	3	0	1	1	1	1	1	5	1	1	1	1	1	5	1	1	0	0	1	1	0	4	1	1	1	0	0	1
1	1	2	1	1	1	0	0	0	1	0	1	1	1	0	1	1	0	0	0	0	4	3	0	1	1	0	1	1	4	1	0	0	1	1	3	1	1	1	1	1	1	0	6	1	1	1	0	0	2
1	1	2	1	1	1	0	0	0	1	1	1	0	1	0	1	0	0	0	1	1	4	3	0	1	1	0	1	1	4	1	1	1	1	1	5	1	1	0	1	1	1	1	6	1	0	1	0	0	1
1	1	3	1	1	0	0	0	0	1	0	1	1	1	0	1	0	0	0	1	1	5	3	0	1	1	1	1	1	5	1	1	1	1	1	5	1	1	1	1	0	1	0	5	1	1	0	0	0	1
1	2	3	1	1	1	0	0	0	1	0	1	1	1	0	1	0	0	0	1	0	4	3	0	1	1	1	1	1	5	1	0	0	1	1	3	1	1	1	1	0	1	0	5	1	1	0	0	0	1
1	3	3	1	1	0	0	0	0	1	0	1	1	1	1	1	1	1	0	1	1	8	0	1	1	1	1	1	1	6	1	1	1	1	1	5	1	1	0	0	1	1	1	5	1	1	0	0	0	4
0	2	3	1	1	0	0	1	0	1	0	1	1	1	0	1	0	1	0	0	1	5	2	0	1	1	1	1	1	5	1	1	1	1	1	5	1	1	0	0	0	1	1	4	1	1	1	0	0	1
1	1	3	1	1	1	0	0	1	1	0	1	1	1	0	1	0	0	0	0	0	3	3	1	0	1	0	1	1	4	1	0	0	1	1	3	1	1	1	1	1	1	1	7	1	1	0	0	0	1
1	1	3	1	1	1	0	0	1	1	0	1	1	1	0	1	0	0	0	0	0	3	3	1	0	1	0	1	1	4	1	0	0	1	1	3	1	1	1	1	1	1	1	7	1	1	0	0	0	1
1	0	2	2	2	0	0	0	0	1	0	1	1	1	0	1	0	0	0	1	1	5	0	0	1	1	1	1	1	5	1	1	1	1	1	5	1	1	0	0	1	1	0	4	1	1	0	0	0	1
1	1	3	2	2	1	0	1	0	0	0	1	1	1	0	1	0	0	0	1	1	5	3	0	0	1	1	1	1	4	0	1	1	1	1	4	0	0	0	0	0	1	0	1	1	0	1	0	0	1
1	1	3	2	1	0	0	0	0	0	0	1	1	1	0	1	1	0	0	1	1	6	0	0	1	1	1	1	1	5	1	1	0	1	1	4	1	1	0	0	0	1	0	3	1	0	1	0	0	1
1	1	2	1	1	1	0	0	0	1	0	1	1	1	1	1	1	0	0	1	0	6	3	0	1	1	1	1	1	5	1	0	0	1	1	3	1	1	1	0	0	1	0	4	1	1	0	0	0	1
0	2	3	1	1	0	0	0	0	1	0	1	1	1	0	1	1	1	0	1	1	7	3	0	1	1	1	1	1	5	1	1	0	1	1	4	1	1	0	0	1	1	1	5	1	1	0	0	0	1
0	1	2	1	1	0	0	0	0	0	0	1	1	1	0	1	0	1	0	1	1	6	0	0	1	1	1	1	1	5	1	1	1	1	1	5	1	0	1	0	1	1	0	4	0	0	1	0	0	2
1	2	3	2	1	1	1	0	0	0	0	1	1	0	0	1	1	0	0	1	0	4	0	0	0	0	1	1	1	3	0	0	0	1	1	2	1	1	0	0	1	1	0	4	1	1	0	0	0	0
0	1	2	2	1	1	0	0	0	0	0	0	1	0	1	1	1	1	0	1	1	7	3	0	1	1	1	1	1	5	1	1	0	1	1	4	1	1	0	0	1	1	1	5	1	0	0	0	0	4
0	1	2	1	1	1	1	1	0	1	1	1	1	1	0	1	1	0	1	1	1	7	3	1	1	1	1	1	1	6	1	1	1	1	1	5	1	1	1	1	0	1	0	5	1	1	0	0	0	1
1	1	3	1	1	0	0	0	0	0	0	1	1	1	0	0	0	0	0	0	0	2	0	0	1	1	1	1	1	5	0	1	1	1	1	4	0	0	1	0	1	1	0	3	1	0	1	0	0	1
1	1	3	1	1	0	0	0	0	0	0	1	1	1	0	0	0	0	0	0	0	2	0	0	1	1	1	1	1	5	0	1	1	1	1	4	0	0	1	0	1	1	0	3	1	0	1	0	0	1
1	2	3	2	1	1	0	0	0	1	0	1	1	0	1	1	0	1	0	1	1	6	3	0	1	1	1	1	1	5	1	0	1	1	1	4	1	1	0	0	1	1	1	5	1	1	0	0	0	1
0	1	3	1	1	0	0	0	0	1	0	1	1	0	0	1	0	0	0	1	1	4	3	0	1	1	1	1	1	5	1	1	0	1	1	4	0	1	0	0	0	1	0	2	1	0	0	0	0	1
0	1	3	1	1	1	0	1	1	0	0	1	1	1	1	1	1	1	1	1	1	9	3	0	1	1	0	1	1	4	1	1	1	1	1	5	1	1	0	0	1	1	1	5	1	0	0	0	0	1
1	1	2	2	1	1	1	0	0	1	1	1	1	1	0	1	0	0	0	1	1	5	3	0	1	1	1	1	1	5	1	0	1	1	1	4	1	1	1	0	1	1	1	6	1	1	0	1	0	2
1	1	3	1	1	0	0	0	1	1	0	1	1	1	0	1	1	0	1	1	0	6	3	1	1	1	1	1	1	6	1	1	1	1	1	5	1	1	1	1	0	1	0	5	1	1	0	0	0	1
1	1	2	1	1	1	0	0	0	0	0	0	1	1	0	1	0	0	1	1	1	6	0	1	1	1	0	1	1	5	1	0	1	1	1	4	1	1	0	0	1	1	1	5	1	0	0	0	0	1
1	1	3	1	1	1	1	1	1	1	1	1	1	1	0	1	1	1	0	1	1	7	3	0	1	1	1	1	1	5	1	1	1	1	1	5	1	1	1	0	1	1	0	5	1	0	0	0	0	2
1	1	3	1	2	1	1	0	0	1	0	1	1	1	0	1	0	1	0	0	0	4	5	1	1	1	1	1	1	6	1	0	0	1	1	3	1	1	1	0	1	1	1	6	1	0	0	0	0	1
1	1	3	2	1	1	1	0	0	1	0	1	1	0	1	1	1	0	1	1	0	6	3	0	1	1	1	0	1	4	1	1	1	1	1	5	1	1	0	0	1	1	0	4	1	1	0	0	0	1
0	1	2	0	2	1	0	0	0	0	0	0	1	1	0	0	1	0	0	1	1	5	0	0	1	1	0	0	1	3	1	1	1	1	1	5	1	1	0	0	1	1	1	5	1	0	0	0	0	3
1	2	3	1	1	1	1	0	0	0	1	0	1	1	0	1	1	0	0	0	0	4	3	1	0	0	1	1	0	3	1	0	0	1	1	3	0	1	0	0	1	0	0	2	1	1	0	0	0	2
0	2	3	1	1	1	1	1	0	1	0	1	1	1	0	1	1	1	0	0	0	5	3	0	1	1	1	1	1	5	1	1	1	1	1	5	1	1	0	1	1	1	1	6	1	1	0	0	0	1
0	2	3	2	2	1	1	1	1	1	1	1	1	1	0	1	1	1	1	1	1	8	3	1	1	1	0	1	1	5	1	1	1	1	1	5	1	1	1	1	0	1	0	5	1	0	0	0	0	0
1	1	3	1	1	1	0	0	0	1	0	1	1	1	0	1	0	0	0	0	1	4	1	0	1	1	1	1	1	5	0	0	1	1	1	3	0	0	0	0	1	1	0	2	0	1	1	0	0	1
0	2	3	1	1	0	0	0	0	0	0	1	1	1	0	1	0	0	0	0	1	4	0	0	1	1	0	1	1	4	0	1	1	1	1	4	0	1	0	1	1	1	1	5	1	0	1	0	0	2
0	4	2	1	1	1	1	0	0	1	0	0	1	1	1	1	0	0	0	0	0	4	0	0	1	1	1	1	1	5	1	1	1	1	1	5	1	1	1	0	0	1	0	4	1	1	0	0	0	2
1	1	3	1	1	0	0	0	1	1	0	1	1	1	0	1	1	1	0	0	1	6	3	0	1	1	1	1	1	5	1	0	0	1	1	3	1	1	1	1	0	1	1	6	1	1	0	0	0	1
0	1	3	1	1	0	0	0	0	0	0	1	1	1	0	0	0	0	0	0	0	2	0	1	1	1	0	0	1	4	1	1	1	1	1	5	1	0	1	0	1	1	0	4	1	0	1	0	0	1
1	1	3	2	1	1	1	1	1	1	0	1	1	0	0	1	1	1	0	0	0	4	3	0	1	1	0	1	1	4	1	1	1	1	1	5	1	1	0	1	1	1	1	6	1	0	0	0	0	1
1	1	2	1	1	1	0	0	1	1	0	1	1	1	0	1	1	0	1	1	1	7	3	0	1	1	1	1	1	5	1	1	0	1	1	4	1	1	0	0	1	1	1	5	1	1	0	0	0	1
0	1	2	2	2	0	0	0	0	0	0	1	1	0	0	0	0	0	0	0	0	1	0	0	0	0	1	1	1	3	1	0	0	0	0	1	1	1	0	0	1	1	0	4	0	1	0	0	0	2
1	3	3	1	1	1	1	0	0	0	0	0	1	1	1	1	1	1	0	1	0	7	0	0	1	1	1	1	0	4	1	1	1	1	1	5	0	1	0	1	0	1	1	4	1	0	0	0	0	1
1	1	3	1	1	1	1	1	0	0	1	1	1	1	1	0	1	1	0	1	0	6	3	0	1	1	1	1	1	5	1	1	1	1	1	5	1	1	0	0	1	1	0	4	1	1	1	0	0	2
1	1	2	0	0	1	1	1	0	1	1	0	1	1	0	1	0	1	0	1	1	6	0	1	1	1	0	0	1	4	1	1	1	1	1	5	1	1	0	0	1	1	1	5	1	1	1	0	0	2
1	1	3	1	1	0	1	0	0	1	0	1	1	1	0	1	1	0	0	1	1	6	3	0	1	1	1	1	1	5	1	0	1	1	1	4	1	1	0	1	1	1	1	6	1	1	0	0	0	2
1	1	3	1	1	0	0	0	0	1	0	1	1	0	0	1	1	0	0	1	1	5	3	0	0	1	1	1	1	4	1	1	1	1	1	5	0	1	0	0	1	1	0	3	0	1	1	0	0	3
0	0	2	1	1	1	0	0	0	0	0	0	1	0	1	1	1	1	0	0	0	5	3	1	1	1	1	1	1	6	1	1	1	1	1	5	1	0	0	0	1	1	0	3	0	0	0	0	1	1
1	1	3	1	1	1	1	0	0	1	0	1	1	1	1	1	1	1	1	1	1	9	3	0	1	1	1	1	1	5	1	1	1	1	1	5	1	1	0	0	0	1	0	3	1	1	0	0	0	1
1	1	3	1	1	0	0	0	0	1	0	1	1	1	0	1	1	1	0	0	0	5	3	1	1	1	1	1	1	6	1	0	0	1	1	3	1	1	1	1	1	1	0	6	1	0	0	0	0	1
0	1	3	1	1	1	1	0	0	1	0	1	1	1	0	1	1	1	0	1	0	6	3	1	1	1	1	1	1	6	1	1	1	1	1	5	1	0	1	0	1	1	1	5	1	1	1	0	0	1
1	1	3	1	1	1	0	0	0	0	0	1	1	1	0	1	0	1	0	0	0	4	3	0	1	1	1	1	1	5	1	1	1	1	1	5	1	0	1	0	1	1	0	4	1	1	1	0	0	1
1	1	3	1	1	1	0	1	0	1	0	1	1	0	0	1	1	1	0	1	0	5	3	0	0	1	1	1	1	4	1	0	1	1	1	4	1	1	0	0	0	1	0	3	1	0	0	0	0	0
1	2	3	1	1	1	1	1	0	0	0	1	1	1	1	1	1	0	0	1	0	6	3	0	1	1	1	1	1	5	1	0	1	1	1	4	1	1	0	1	0	1	0	4	1	0	1	0	0	2
0	2	3	1	1	1	0	0	0	0	0	1	1	1	1	1	1	1	1	1	1	9	3	0	1	1	1	1	1	5	1	1	1	1	1	5	0	1	1	1	1	1	0	5	1	1	0	0	0	2
1	1	3	1	1	0	0	0	0	1	0	1	1	1	1	1	1	1	0	0	0	6	3	0	1	1	1	1	1	5	1	1	1	1	1	5	0	1	1	0	1	1	0	4	1	1	0	0	0	1
1	1	3	1	1	1	0	0	0	1	0	1	1	1	0	1	1	0	0	0	0	4	3	0	1	1	1	1	1	5	1	1	1	1	1	5	1	1	0	0	1	1	0	4	1	1	0	1	0	1
1	1	3	1	1	1	0	1	1	1	0	1	1	1	0	1	1	1	0	0	0	5	5	0	1	1	1	1	1	5	1	1	0	1	1	4	1	1	1	1	1	1	1	7	1	1	0	0	0	1
1	1	2	2	2	1	0	0	0	0	1	1	1	0	1	1	0	0	0	0	0	3	3	1	0	1	0	1	1	4	1	1	0	0	1	3	1	1	0	0	1	1	1	5	1	1	1	0	0	2
1	2	3	1	1	0	0	0	0	0	0	1	1	1	1	1	1	0	0	0	1	6	3	0	1	1	1	1	1	5	1	1	1	1	1	5	1	1	1	1	0	1	0	5	1	1	1	0	0	1
1	1	2	1	1	0	0	0	0	1	0	1	1	0	1	1	0	1	0	1	1	6	3	0	1	1	1	1	1	5	1	1	1	1	1	5	0	1	0	1	1	1	0	4	1	1	0	0	0	1
0	2	3	1	1	0	0	0	0	1	0	1	1	1	0	1	1	1	0	1	0	6	3	0	1	1	1	1	1	5	1	1	1	1	1	5	1	1	0	0	1	1	1	5	1	1	0	0	0	2
1	1	2	1	1	1	1	1	0	1	1	1	1	1	1	1	1	1	1	1	1	9	3	0	1	1	0	1	1	4	1	1	1	1	1	5	1	1	0	0	1	1	1	5	1	1	1	1	0	5
1	2	3	1	1	0	0	0	0	1	0	1	1	1	0	1	1	1	1	1	1	8	3	1	1	1	0	1	1	5	1	1	1	1	1	5	1	1	0	0	0	1	0	3	1	1	0	0	0	1
1	1	3	1	1	1	1	1	0	1	0	1	1	1	0	0	1	0	0	0	1	4	8	0	1	1	1	1	0	4	1	1	0	1	0	3	1	1	0	0	1	1	1	5	1	1	0	0	0	1
1	2	3	2	1	0	0	0	0	1	0	0	1	1	0	1	0	1	0	0	1	5	0	0	0	0	1	1	1	3	1	1	1	1	1	5	1	1	0	1	1	1	0	5	1	1	0	0	0	3
1	1	3	2	2	1	0	0	0	0	1	1	1	1	1	1	0	0	0	0	0	4	3	0	1	1	1	1	1	5	1	1	1	1	1	5	1	1	0	0	1	1	1	5	1	0	1	0	0	1
0	3	3	1	1	1	1	0	0	0	0	0	1	1	0	1	0	0	0	1	1	5	3	0	1	1	1	1	1	5	1	1	1	1	1	5	1	1	0	0	0	1	0	3	1	1	1	0	0	1
0	2	2	2	1	1	1	1	0	0	1	1	1	1	1	1	0	0	0	0	0	4	3	1	1	1	0	1	1	5	1	1	1	1	1	5	1	1	0	0	1	1	1	5	1	1	0	0	0	1
1	2	3	1	1	1	0	0	0	0	0	1	1	1	0	1	1	1	0	1	0	6	3	0	1	1	1	1	1	5	1	1	1	1	1	5	1	1	1	0	1	1	1	6	1	1	1	0	0	1
1	2	3	1	1	1	0	0	0	0	0	1	1	1	0	1	1	1	0	1	0	6	3	0	1	1	1	1	1	5	1	1	1	1	1	5	1	1	1	0	1	1	1	6	1	1	1	0	0	1
0	1	3	0	0	1	0	0	0	1	0	0	1	1	0	1	0	1	0	0	0	4	3	0	1	1	1	1	1	5	1	1	1	1	1	5	1	1	1	0	1	1	1	6	1	0	0	0	0	3
0	1	3	1	1	1	0	0	0	1	0	1	1	1	0	1	1	1	0	1	1	7	3	0	1	1	1	1	1	5	1	1	1	1	1	5	1	1	0	0	1	1	1	5	1	1	0	0	0	1
0	0	2	1	1	1	0	0	0	0	0	1	1	1	0	0	0	0	1	1	0	4	5	0	1	1	1	1	1	5	1	0	1	1	1	4	1	1	0	0	1	1	0	4	1	0	0	0	0	1
1	1	3	1	1	0	0	0	0	1	0	1	1	1	0	1	1	0	0	1	0	5	3	0	1	1	1	1	0	4	1	1	0	1	0	3	1	1	1	0	1	1	0	5	1	0	0	0	0	1
1	1	3	2	1	0	0	1	1	1	0	1	1	1	0	1	1	1	0	0	0	5	3	1	1	1	1	1	1	6	1	1	1	1	1	5	1	0	1	1	1	1	1	6	1	1	0	0	0	1
1	1	3	1	1	1	0	0	0	0	0	1	1	1	0	1	1	1	0	0	0	5	3	0	1	1	1	1	1	5	1	1	1	1	1	5	1	0	0	0	1	1	0	3	1	1	1	0	0	6
0	2	2	1	1	1	0	0	0	0	0	0	1	0	0	1	1	0	1	1	1	6	0	0	1	1	0	1	1	4	1	1	1	1	1	5	1	1	0	0	1	1	1	5	1	0	0	0	0	3
1	1	3	2	2	1	0	1	0	1	1	1	1	0	0	1	1	1	1	1	0	6	3	0	1	1	1	1	1	5	1	1	1	1	1	5	1	1	1	1	1	1	0	6	1	1	0	0	0	1
1	2	3	1	1	1	0	1	0	0	0	0	1	1	1	1	1	1	1	1	0	8	3	0	1	1	0	1	1	4	1	1	1	1	1	5	1	0	1	1	0	1	1	5	1	1	0	0	0	1
1	1	3	1	1	1	1	0	0	0	1	1	1	1	1	1	1	1	0	1	1	8	3	0	1	1	0	0	1	3	1	1	1	1	1	5	1	1	1	0	1	1	1	6	1	0	0	0	0	1
1	1	3	1	1	1	0	1	1	1	0	1	1	1	0	1	0	1	0	0	1	5	3	0	1	1	1	1	1	5	1	1	1	1	1	5	1	0	1	0	1	1	1	5	1	1	0	0	1	1
1	3	3	1	1	1	1	0	0	1	1	1	1	0	1	1	1	0	0	1	1	6	3	0	1	1	1	1	1	5	1	1	1	1	1	5	0	1	1	0	0	1	0	3	1	0	1	0	0	1
1	1	3	1	1	1	0	0	0	1	0	1	1	0	0	1	0	1	0	0	0	3	0	0	1	1	1	1	1	5	1	0	0	1	1	3	0	1	0	0	1	1	0	3	0	0	1	0	0	1
1	1	2	2	1	1	1	0	0	0	1	1	1	1	0	1	0	0	1	0	0	4	3	1	1	1	1	1	1	6	1	1	1	1	1	5	0	1	0	1	1	1	0	4	1	1	0	0	0	1
1	1	2	2	1	1	0	0	0	0	0	1	1	1	0	1	1	0	0	1	1	6	3	1	1	1	0	1	1	5	1	0	1	1	1	4	0	1	1	1	1	1	1	6	1	0	0	0	0	1
0	1	3	1	1	0	0	0	0	0	0	1	1	1	1	1	1	1	0	0	1	7	3	1	1	1	1	1	1	6	1	1	1	1	1	5	1	1	0	0	1	1	1	5	1	1	0	0	0	1
1	4	3	2	2	0	0	0	0	0	0	1	1	1	0	0	1	0	0	0	1	4	3	1	1	0	1	1	0	4	1	1	0	1	1	4	0	1	1	1	0	0	0	3	1	0	1	0	0	1
1	2	3	0	1	1	0	0	0	0	0	0	1	0	1	1	1	0	1	1	0	6	0	1	1	1	0	1	1	5	1	1	1	1	1	5	1	1	0	0	1	1	1	5	1	0	0	0	0	2
1	3	3	2	2	1	0	0	0	0	0	1	1	1	0	1	1	1	1	1	0	7	3	0	1	1	1	1	1	5	1	1	1	1	1	5	0	0	0	1	0	1	1	3	1	1	1	0	0	1
0	1	2	2	1	0	0	0	1	0	0	0	1	1	0	1	0	0	0	1	0	4	3	0	1	1	1	1	1	5	1	1	1	1	1	5	1	0	0	0	1	1	0	3	1	1	0	0	0	1
1	1	3	0	2	0	0	0	0	0	0	1	1	1	0	1	1	0	0	0	0	4	0	0	1	0	0	1	1	3	0	1	0	1	1	3	1	1	0	0	1	1	1	5	0	0	0	0	1	1
1	1	3	2	2	1	1	0	0	1	0	0	1	1	0	1	1	0	0	0	1	5	3	1	1	1	1	1	1	6	1	1	1	1	1	5	1	1	0	0	1	1	0	4	1	1	1	0	0	2
1	1	2	2	1	0	0	0	1	1	0	0	1	1	1	1	1	0	0	0	1	6	3	0	1	1	1	1	1	5	1	1	1	1	1	5	1	1	0	0	1	1	1	5	1	0	0	0	0	1
0	1	3	2	2	0	0	1	1	1	0	1	1	1	0	1	1	1	0	0	0	5	0	0	1	1	1	1	1	5	0	1	1	1	1	4	1	0	1	0	1	1	1	5	1	1	0	1	0	5
1	4	3	1	1	1	1	1	0	0	0	1	1	1	1	1	1	0	0	1	1	7	3	1	1	1	1	1	1	6	1	1	1	1	1	5	1	0	1	0	1	1	1	5	1	0	0	0	0	2
0	1	2	1	1	0	0	0	0	1	0	1	1	1	1	1	0	0	0	0	0	4	3	0	1	1	1	1	1	5	1	1	1	1	1	5	1	1	1	1	1	1	0	6	1	0	0	0	0	1
1	3	3	1	1	1	0	1	0	1	0	1	1	1	0	1	1	1	0	1	0	6	3	0	1	1	1	1	1	5	1	1	1	1	1	5	0	1	0	1	0	1	0	3	1	0	1	0	0	1
1	1	3	2	1	1	1	0	0	0	1	0	1	1	1	1	1	0	0	1	1	7	1	1	1	1	1	1	1	6	1	1	1	1	0	4	0	0	0	0	1	1	0	2	1	0	1	0	0	1
1	1	2	1	2	1	0	0	0	0	1	0	1	1	0	1	0	0	1	0	1	5	0	0	1	1	1	1	1	5	1	1	1	1	1	5	1	1	0	0	1	1	0	4	0	1	1	0	0	1
1	5	2	1	2	1	0	0	0	0	0	0	1	1	1	1	1	1	1	1	1	9	2	0	1	1	1	1	1	5	1	1	0	1	1	4	0	1	0	0	0	0	0	1	1	0	0	0	0	6
1	4	3	1	1	0	0	1	0	0	0	1	1	1	1	1	1	1	1	1	1	9	3	1	1	1	0	1	1	5	1	1	1	1	1	5	1	1	0	0	1	1	1	5	1	1	0	0	0	4
1	1	2	1	1	1	1	1	1	1	1	1	1	1	0	1	1	1	0	1	1	7	3	1	1	1	0	1	1	5	1	1	1	1	1	5	1	1	1	1	1	1	1	7	1	1	0	0	0	1
0	2	3	1	1	0	0	0	0	0	0	1	1	1	0	1	1	1	0	1	0	6	3	0	1	1	1	0	1	4	1	0	1	1	1	4	1	1	1	0	0	1	1	5	1	1	1	0	0	2
1	1	3	1	1	1	0	0	0	1	0	1	1	1	0	1	1	0	0	0	1	5	3	0	1	1	1	1	1	5	1	0	0	1	1	3	1	1	1	1	1	1	1	7	1	1	0	0	0	1
1	1	3	2	1	0	0	0	0	1	0	1	1	1	1	1	0	0	1	0	1	6	3	0	0	1	1	1	1	4	1	1	1	1	1	5	0	0	0	1	0	1	0	2	1	1	0	1	0	1
0	2	3	1	1	0	0	0	0	0	0	1	1	1	0	1	1	0	1	0	0	5	3	0	1	1	0	1	1	4	1	1	1	1	1	5	1	1	0	0	1	1	1	5	1	1	0	0	0	1
1	1	2	2	1	1	1	1	0	1	1	1	1	1	1	1	1	1	1	1	1	9	0	1	1	1	1	1	1	6	1	1	1	1	1	5	1	0	0	0	0	1	0	2	1	1	1	0	0	3
1	1	3	2	2	1	0	0	0	0	0	1	1	1	1	1	1	1	0	1	1	8	0	0	0	0	1	1	1	3	1	1	1	1	1	5	1	1	0	0	1	1	1	5	1	0	0	0	0	2
1	4	3	1	2	0	0	1	0	1	0	0	1	1	0	1	1	1	0	1	0	6	3	0	1	1	1	1	1	5	1	1	0	1	1	4	0	1	0	0	0	0	0	1	0	1	1	0	0	1
1	1	2	1	1	0	0	0	0	1	0	1	1	1	1	1	0	0	0	1	0	5	3	0	0	0	1	1	1	3	1	1	1	1	1	5	1	1	0	1	1	1	0	5	1	1	1	0	0	1
1	1	2	0	1	1	1	0	0	0	0	0	1	1	0	1	1	1	1	1	1	8	3	0	0	1	1	1	1	4	1	1	1	1	1	5	1	1	0	0	1	1	1	5	1	1	0	0	0	2
1	1	2	1	1	0	0	0	0	1	0	1	1	1	1	1	0	0	0	1	0	5	3	0	0	0	1	1	1	3	1	1	1	1	1	5	1	1	0	1	1	1	0	5	1	1	1	0	0	1
1	1	2	1	1	1	0	1	0	1	0	1	1	1	0	1	1	1	0	1	0	6	3	0	1	1	1	1	1	5	1	1	0	1	1	4	1	1	0	0	0	1	0	3	1	1	0	0	0	1
1	1	3	1	1	1	0	0	1	1	0	1	1	1	1	1	1	1	1	1	1	9	3	1	1	1	1	1	1	6	1	1	0	1	1	4	1	1	1	0	1	1	1	6	1	1	1	1	0	1
1	4	1	2	0	0	1	0	0	0	0	0	1	1	1	1	1	1	0	1	1	8	3	0	1	1	1	1	1	5	1	1	1	1	1	5	1	1	0	0	0	1	0	3	1	1	0	0	0	2
1	2	3	1	2	1	0	0	0	0	0	1	1	1	0	1	1	1	0	1	1	7	0	0	1	1	0	1	1	4	1	1	1	1	1	5	1	1	0	0	1	1	1	5	1	0	1	0	0	4
0	1	2	2	1	1	0	0	0	1	0	1	1	1	0	1	1	1	0	1	0	6	3	0	1	1	0	0	1	3	1	1	0	1	1	4	1	1	0	0	1	1	1	5	1	1	1	1	0	1
1	2	3	1	1	1	0	0	0	0	0	0	1	1	1	1	1	1	1	1	1	9	3	1	1	1	1	1	1	6	1	1	1	1	1	5	1	1	1	1	0	1	1	6	1	1	0	0	0	1
1	0	3	1	1	0	0	0	0	1	0	1	1	1	0	1	1	0	0	1	0	5	3	0	1	1	1	1	1	5	1	0	0	1	1	3	1	1	0	0	1	1	1	5	1	0	0	0	0	1
0	2	2	1	1	0	0	1	0	1	0	0	1	1	0	1	1	0	1	0	1	6	0	0	1	1	1	1	1	5	1	1	0	1	1	4	1	1	1	1	1	1	1	7	1	0	0	0	0	1
1	1	3	2	1	1	1	1	0	0	0	1	1	1	0	1	1	1	0	1	0	6	3	0	1	1	1	1	1	5	1	1	0	1	1	4	0	0	1	0	0	0	0	1	1	0	0	0	0	4
1	3	3	1	1	0	1	1	1	1	0	0	1	1	1	1	1	1	0	1	1	8	5	0	1	1	1	0	1	4	1	1	1	1	1	5	1	1	0	0	1	1	1	5	1	1	0	0	0	2
1	2	3	2	1	0	0	0	0	1	0	0	1	1	0	1	1	0	0	0	1	5	3	0	0	1	1	1	1	4	0	1	1	1	0	3	0	1	0	0	0	1	0	2	0	0	0	0	1	0
1	1	3	1	1	1	0	0	0	1	0	1	1	1	0	0	0	0	0	0	1	3	3	0	0	1	1	1	1	4	1	1	1	1	1	5	1	1	0	0	1	1	1	5	1	0	0	0	0	1
0	1	2	1	1	1	1	1	0	0	0	1	1	1	1	1	1	0	0	0	1	6	3	0	1	0	1	1	1	4	1	1	1	1	1	5	1	1	0	0	1	1	1	5	1	0	0	0	0	1
0	1	2	1	1	0	0	0	0	1	0	1	1	1	1	1	1	1	0	1	1	8	3	0	1	1	1	1	1	5	1	1	1	1	1	5	1	1	0	0	1	1	1	5	1	1	0	0	0	1
1	2	3	1	1	0	0	1	0	1	0	1	1	1	0	1	1	0	1	1	1	7	3	0	1	1	1	1	1	5	1	1	0	1	0	3	1	1	1	1	1	1	1	7	1	1	0	0	0	1
1	2	3	1	1	1	0	0	0	1	1	1	1	1	1	1	0	0	0	1	1	6	0	0	0	1	0	0	1	2	1	1	1	1	1	5	1	0	1	0	0	1	0	3	1	1	1	0	0	0
1	3	2	1	1	1	1	1	0	1	1	0	1	1	1	1	1	1	0	1	1	8	3	0	1	1	0	1	1	4	1	0	1	1	1	4	1	1	0	1	1	1	0	5	1	1	1	1	0	6
1	1	2	1	1	1	1	1	0	0	0	1	1	1	1	1	1	1	0	0	1	7	3	1	1	1	1	1	1	6	1	1	1	1	1	5	1	1	0	0	1	1	1	5	1	0	0	0	0	2
1	4	2	2	1	0	1	0	0	0	0	1	1	1	0	1	1	1	0	1	0	6	3	0	1	1	1	1	1	5	1	0	0	1	1	3	1	1	1	0	0	1	1	5	1	0	1	0	0	1
1	2	2	2	2	1	1	1	0	0	1	0	1	1	1	1	1	0	1	1	0	7	3	0	0	1	1	1	1	4	1	1	1	1	1	5	1	1	0	0	1	1	1	5	1	1	1	1	0	3
1	3	2	0	2	1	0	1	0	0	0	0	1	1	1	1	0	0	0	0	0	4	0	1	1	1	0	0	1	4	1	0	1	1	1	4	1	1	0	0	1	1	1	5	1	0	0	0	0	5
1	1	3	1	1	1	0	0	0	1	1	1	1	1	1	1	1	1	1	1	1	9	3	1	1	1	0	1	1	5	1	1	1	1	1	5	1	1	0	0	1	1	1	5	1	1	0	1	0	2
0	1	3	1	1	1	0	0	0	1	0	1	1	1	0	1	1	1	1	0	0	6	0	0	1	1	0	0	1	3	1	1	1	1	1	5	0	0	1	0	1	1	1	4	1	1	1	1	0	1
1	3	1	1	1	1	0	0	0	0	0	0	1	1	1	1	1	1	1	1	1	9	3	0	0	1	0	0	1	2	1	1	1	1	1	5	1	0	1	1	0	0	0	3	1	1	1	0	0	1
0	1	3	1	1	1	1	1	0	0	1	1	1	1	1	1	1	0	1	1	1	8	0	0	0	1	1	1	1	4	1	1	0	1	1	4	1	1	0	0	1	1	1	5	0	0	0	0	1	1
1	4	3	1	1	1	1	0	0	0	0	1	1	1	1	1	1	1	0	0	0	6	3	0	1	1	1	1	1	5	1	0	1	1	1	4	0	1	0	0	0	1	1	3	1	1	0	0	0	3
1	0	2	2	1	0	0	1	0	1	0	1	1	1	0	1	1	1	0	1	1	7	3	0	1	1	0	1	1	4	1	0	0	1	1	3	1	1	1	0	0	1	1	5	1	1	0	0	0	1
1	1	2	1	1	1	1	1	0	1	0	1	1	1	0	1	1	1	0	1	0	6	3	0	1	1	1	1	1	5	1	1	1	1	1	5	1	1	0	0	1	1	1	5	1	1	0	0	0	1
1	2	3	2	2	1	1	1	0	0	1	1	1	1	1	1	1	1	1	1	1	9	3	0	1	1	1	1	1	5	1	1	1	1	1	5	0	0	1	1	0	1	0	3	1	1	1	0	0	2
0	0	1	1	1	1	1	1	1	1	1	1	1	0	1	1	0	1	1	1	1	7	5	0	0	1	1	0	1	3	1	0	1	1	1	4	1	1	0	0	1	1	1	5	1	0	0	0	0	4
1	2	3	2	2	1	1	0	0	1	0	1	1	1	0	1	1	0	0	1	0	5	3	0	1	1	1	1	1	5	1	1	0	1	1	4	1	1	0	0	1	1	1	5	1	1	0	0	0	1
0	3	3	1	1	1	1	0	0	1	0	1	1	1	0	1	1	1	0	1	0	6	3	0	1	1	1	1	1	5	1	1	1	1	1	5	1	1	0	0	1	1	1	5	1	1	0	0	0	1
1	1	3	2	1	1	0	0	0	0	0	0	1	1	1	1	1	1	0	0	1	7	3	1	1	1	1	1	1	6	1	1	1	1	1	5	1	1	1	1	0	1	0	5	1	1	1	0	0	1
1	1	3	1	1	1	0	1	0	1	1	1	1	1	0	1	1	0	0	0	0	4	3	0	1	1	1	1	1	5	1	1	0	1	1	4	0	1	1	1	1	1	0	5	1	1	0	0	0	1
1	4	3	1	1	0	0	0	0	1	0	1	1	1	0	1	1	1	1	1	1	8	3	0	1	1	1	1	1	5	1	0	0	1	1	3	1	1	0	1	1	1	0	5	1	1	0	0	0	1
1	5	3	1	1	1	1	0	0	1	0	1	1	1	0	1	1	1	0	0	0	5	3	0	1	1	1	1	1	5	1	0	1	1	1	4	1	0	1	1	1	1	1	6	1	0	0	0	0	1
0	1	3	1	1	1	1	0	0	1	0	1	1	1	0	1	1	1	1	1	1	8	3	0	1	1	0	1	1	4	1	1	1	1	1	5	1	1	0	0	0	1	0	3	1	1	1	0	0	1
1	3	3	1	1	0	0	0	0	0	0	1	1	1	0	0	0	0	0	0	0	2	3	0	0	0	1	1	1	3	1	0	0	0	0	1	1	1	0	1	1	1	0	5	1	1	0	0	0	2
1	1	2	2	2	1	0	0	0	0	0	0	1	1	0	1	1	0	0	1	0	5	3	0	1	1	0	1	1	4	1	1	1	1	1	5	1	1	0	0	1	1	1	5	1	1	0	0	0	1
0	3	3	1	1	1	1	0	1	0	0	1	1	1	1	1	1	1	0	1	1	8	3	1	1	1	1	0	1	5	1	1	1	1	1	5	1	1	0	0	0	1	0	3	1	1	0	0	0	1
1	2	3	1	1	0	0	0	0	1	0	1	1	1	0	1	1	1	0	1	0	6	3	0	1	1	0	1	1	4	1	1	1	1	1	5	1	1	1	1	0	1	0	5	1	1	1	0	0	2
0	3	3	1	1	0	0	0	1	1	0	1	1	0	0	1	1	0	0	1	1	5	3	1	1	0	1	1	0	4	1	0	1	1	0	3	0	0	1	1	1	1	1	5	1	1	1	0	0	2
1	3	3	1	1	1	1	0	0	1	0	1	0	1	0	1	0	0	0	1	0	3	3	1	1	1	0	1	1	5	1	0	0	1	1	3	1	1	0	0	1	1	0	4	1	1	0	0	0	2
0	3	3	1	1	0	0	0	0	0	0	1	1	1	0	1	1	0	1	0	1	6	3	0	1	1	1	1	1	5	1	1	1	1	1	5	1	1	0	0	1	1	1	5	1	1	0	0	0	2
1	3	2	1	1	1	1	0	0	0	0	1	1	1	1	1	1	1	1	1	1	9	3	1	1	1	1	1	1	6	1	1	1	1	1	5	0	0	1	0	0	1	1	3	1	1	0	1	0	2
0	1	2	2	1	1	0	0	0	1	1	1	1	1	0	1	1	1	0	1	1	7	3	0	1	1	1	1	1	5	0	1	1	1	1	4	0	0	1	0	1	1	0	3	1	1	0	0	0	2
1	1	2	0	2	0	0	0	0	1	0	1	1	1	0	1	0	0	0	0	1	4	2	0	1	1	1	1	1	5	1	1	1	1	1	5	1	1	0	1	1	1	0	5	1	0	1	0	0	6
1	0	2	1	1	1	1	1	0	0	1	0	1	1	1	1	1	0	1	1	1	8	8	0	1	1	1	0	1	4	1	1	1	1	1	5	1	0	0	0	0	1	0	2	1	1	0	0	0	1
1	1	3	0	1	1	0	0	0	0	0	0	1	1	0	1	0	0	0	0	0	3	3	0	1	1	0	1	1	4	1	1	1	1	1	5	0	0	0	0	1	1	1	3	1	1	0	0	0	1
1	0	2	1	1	1	1	0	0	0	1	0	1	1	1	1	1	0	1	1	1	8	3	0	1	1	1	0	1	4	1	1	1	1	1	5	1	1	0	0	1	1	0	4	1	1	0	0	0	1
1	0	2	1	1	1	1	1	0	0	1	0	1	1	1	1	1	0	1	1	1	8	3	0	1	1	1	0	1	4	1	1	1	1	1	5	1	1	0	0	1	1	0	4	0	1	0	0	0	1
0	2	3	2	1	1	1	1	1	1	1	1	1	1	1	1	0	1	0	0	1	6	3	0	0	1	1	1	1	4	1	1	1	1	1	5	1	1	0	0	1	1	1	5	1	0	0	0	0	1
0	1	3	2	2	1	0	0	0	0	0	0	1	1	1	1	1	1	0	1	1	8	3	0	1	0	0	1	1	3	1	1	1	1	1	5	1	1	0	0	1	1	1	5	1	0	1	0	0	1
0	2	2	1	1	1	1	0	0	0	0	0	1	1	1	0	0	0	0	0	0	3	0	0	0	1	1	1	0	3	1	1	0	1	0	3	1	1	0	0	1	1	1	5	1	0	0	0	0	2
0	1	3	1	1	1	0	0	0	0	1	1	1	1	0	1	1	1	0	1	1	7	0	0	0	1	1	0	1	3	1	1	1	1	1	5	1	1	1	1	1	1	0	6	1	1	0	0	0	1
1	1	3	1	1	0	0	0	0	0	0	1	1	1	0	1	1	1	0	1	0	6	0	0	1	1	0	1	1	4	1	1	1	1	1	5	1	1	0	1	1	1	0	5	1	1	0	0	0	2
1	1	3	1	2	1	1	1	0	1	0	1	1	1	1	1	1	0	0	0	0	5	3	1	1	1	1	1	1	6	1	1	1	1	1	5	1	1	1	0	1	1	1	6	1	1	0	0	0	1
1	2	2	1	2	1	0	0	0	0	0	0	1	1	1	1	1	1	1	1	1	9	0	0	1	1	1	0	1	4	1	1	1	1	1	5	1	1	0	0	0	1	0	3	1	1	1	0	0	2
1	1	3	2	1	0	1	0	0	1	0	1	1	1	0	1	0	1	0	0	0	4	3	0	1	1	0	0	1	3	1	1	1	1	1	5	1	1	1	0	1	1	1	6	1	0	0	0	0	1
1	1	3	2	2	0	0	1	0	1	0	1	1	1	1	1	1	1	0	1	1	8	3	0	1	1	0	1	1	4	1	0	1	1	1	4	1	0	1	0	0	1	0	3	1	0	0	0	0	2
1	1	3	1	1	1	0	0	0	1	1	1	1	1	0	1	1	0	0	0	1	5	0	0	1	1	0	1	1	4	1	1	0	1	1	4	1	1	0	0	0	1	0	3	1	1	0	0	0	1
1	1	3	1	1	1	0	1	0	1	0	1	1	1	0	1	1	0	0	0	1	5	3	0	1	1	1	1	1	5	1	0	1	1	1	4	1	1	0	1	1	1	1	6	1	1	0	0	0	1
1	1	3	1	1	1	0	1	0	1	1	1	1	1	0	1	1	0	0	1	1	6	3	1	1	1	0	1	1	5	1	0	1	1	1	4	1	1	1	1	0	1	0	5	1	1	0	0	0	1
0	0	2	2	2	1	1	0	0	0	1	0	1	1	1	1	1	1	1	1	1	9	3	0	0	1	0	0	1	2	1	0	0	1	1	3	1	1	0	0	1	1	1	5	1	0	0	0	0	1
1	1	2	1	1	0	1	1	0	1	0	1	1	1	0	1	1	1	1	1	1	8	3	0	1	1	0	1	1	4	1	1	1	1	1	5	1	1	0	0	1	1	1	5	1	1	0	0	0	1
1	2	3	2	1	1	0	0	0	1	0	1	1	1	0	1	1	1	1	0	1	7	3	0	1	1	1	1	1	5	1	0	0	1	1	3	1	1	0	0	1	1	1	5	1	1	0	0	0	1
1	3	3	1	1	1	1	1	1	1	1	1	1	1	0	1	0	1	1	1	1	7	8	0	0	1	0	1	0	2	1	1	1	1	1	5	1	1	0	0	1	0	0	3	1	0	0	0	0	5
1	1	3	1	1	0	0	0	0	0	0	1	1	1	1	1	1	1	0	1	0	7	0	0	0	1	1	1	1	4	1	0	0	1	1	3	0	1	0	1	1	1	1	5	1	1	0	0	0	1
1	4	3	2	1	1	0	0	0	0	1	0	1	1	0	1	1	1	0	1	0	6	3	0	1	1	1	1	1	5	0	1	1	1	1	4	0	1	1	1	0	1	1	5	1	1	0	0	0	1
0	1	3	1	1	1	1	1	0	1	1	1	1	1	0	1	1	0	0	1	1	6	3	0	1	1	1	1	1	5	1	1	1	1	1	5	1	0	0	0	0	1	0	2	1	1	0	0	0	1
1	1	2	2	1	1	0	0	0	1	1	1	1	1	0	1	1	1	0	0	1	6	3	0	1	1	0	1	1	4	1	1	1	1	1	5	1	0	1	1	1	1	0	5	1	0	0	0	0	3
1	1	2	1	1	1	0	1	0	1	0	1	1	1	1	1	1	0	0	1	0	6	3	0	1	1	1	1	1	5	1	0	1	1	1	4	1	1	1	0	1	1	0	5	1	1	0	1	0	1
0	1	2	2	1	1	1	1	1	1	1	1	1	1	0	1	1	1	0	1	1	7	3	0	1	1	1	1	1	5	1	1	1	1	1	5	1	1	1	0	1	1	0	5	1	1	1	0	0	0
1	1	3	1	1	0	0	0	0	1	0	1	1	1	0	1	1	0	0	1	0	5	3	1	1	1	1	1	1	6	1	1	1	1	1	5	1	1	0	0	1	1	1	5	0	1	0	0	0	1
1	1	3	1	1	0	0	0	0	0	0	1	1	1	0	0	0	1	0	0	0	3	0	0	1	1	1	1	1	5	1	0	1	1	1	4	1	1	1	0	1	1	1	6	1	1	1	0	0	1
0	0	3	1	1	1	1	1	0	1	1	1	1	1	1	1	1	1	0	1	0	7	3	1	1	1	0	1	1	5	1	1	1	1	1	5	1	1	1	1	0	0	0	4	1	0	0	0	1	1
1	1	2	1	1	0	0	1	1	1	0	1	1	1	0	1	1	0	0	1	0	5	0	0	1	1	0	1	1	4	1	1	1	1	1	5	1	0	0	0	1	1	0	3	1	1	1	0	0	1
0	1	3	2	2	1	0	0	0	1	0	1	1	1	0	1	0	1	0	0	1	5	5	0	0	1	1	1	1	4	0	1	0	1	1	3	0	0	0	0	1	1	0	2	1	1	0	0	0	1
0	1	2	1	1	0	0	0	0	0	0	1	0	0	0	1	0	0	0	0	0	1	3	0	1	1	0	1	1	4	1	1	0	1	1	4	1	1	0	0	1	1	1	5	1	0	0	0	0	2
0	4	3	1	1	0	1	1	0	1	0	0	1	0	0	1	0	1	0	0	1	4	3	0	1	1	1	1	1	5	1	1	0	1	1	4	1	1	0	0	1	1	0	4	1	0	0	0	0	1
1	1	3	1	1	1	1	1	0	1	1	1	1	1	0	1	1	0	0	1	1	6	3	1	1	1	1	1	1	6	1	1	1	1	1	5	0	0	1	1	0	1	0	3	1	1	0	0	0	0
0	3	3	1	1	0	0	1	0	1	0	1	1	1	0	1	1	1	0	1	0	6	3	0	1	1	1	1	1	5	1	1	1	1	1	5	0	1	1	0	0	1	0	3	1	0	0	0	0	1
1	1	3	2	1	1	0	0	0	0	0	1	1	1	0	1	1	0	0	0	1	5	3	0	1	1	0	0	1	3	1	1	1	1	1	5	1	1	0	0	1	1	1	5	1	1	0	0	0	2
0	2	3	1	1	0	0	0	0	0	0	1	1	1	1	1	1	0	0	0	1	6	3	0	1	1	1	1	1	5	1	1	1	1	1	5	0	1	1	1	1	1	0	5	1	1	0	0	0	1
0	1	3	1	1	0	0	0	0	1	0	1	1	1	0	1	0	1	0	1	0	5	3	1	1	1	0	1	1	5	1	1	1	1	1	5	1	1	0	0	1	1	1	5	1	0	0	0	0	1
0	1	2	2	1	1	0	0	1	1	0	0	1	1	1	1	1	0	0	0	0	5	3	0	1	1	1	1	1	5	1	1	0	1	1	4	1	1	0	0	1	1	1	5	1	0	0	0	0	1
1	2	3	1	1	1	1	1	0	1	1	1	1	1	0	1	1	0	0	1	1	6	0	0	1	1	0	1	1	4	1	1	1	1	1	5	1	1	1	1	0	1	1	6	1	1	1	1	0	1
0	1	2	2	1	0	0	0	0	0	0	1	1	0	1	1	0	0	0	1	0	4	0	0	0	1	1	1	1	4	1	1	1	1	1	5	1	1	0	0	1	1	1	5	1	0	0	0	0	4
1	2	3	2	2	1	0	1	0	1	0	0	1	0	0	1	1	0	0	1	0	4	3	0	1	1	1	1	1	5	1	0	0	1	1	3	0	1	0	0	0	1	0	2	1	0	1	0	0	1
0	1	2	1	1	1	0	0	0	0	0	1	1	1	1	1	0	0	1	1	1	7	3	0	1	1	1	1	1	5	1	1	1	1	1	5	1	1	0	0	1	1	1	5	1	0	1	0	0	4
0	3	3	1	1	1	1	0	0	1	0	1	1	1	0	1	0	1	0	1	0	5	3	1	1	1	0	0	1	4	1	1	1	1	1	5	1	1	0	0	1	1	1	5	1	1	0	0	0	4
1	3	3	1	1	0	0	0	0	1	0	0	1	1	0	1	0	1	0	1	1	6	3	0	0	1	1	1	1	4	1	0	0	1	1	3	0	1	0	0	0	1	0	2	1	0	1	0	0	4
1	3	2	0	0	1	0	0	0	0	0	0	1	0	0	1	0	0	0	1	1	4	3	0	1	1	1	1	1	5	1	1	1	1	1	5	1	1	0	1	1	1	1	6	1	1	0	0	0	0
0	2	3	2	1	0	0	1	0	0	0	1	1	1	0	1	0	0	0	1	0	4	1	0	1	1	1	1	0	4	1	0	1	1	1	4	1	1	0	0	1	1	1	5	1	1	0	0	0	1
1	2	3	1	1	1	1	1	0	1	1	1	1	1	1	1	1	1	1	1	1	9	3	0	1	1	1	1	1	5	1	1	1	1	1	5	1	1	1	0	0	1	0	4	1	1	1	0	0	2
1	1	3	2	1	1	1	0	0	0	0	1	1	1	0	1	1	1	1	1	1	8	3	1	1	1	1	1	1	6	1	0	0	1	1	3	1	1	0	0	1	1	1	5	1	1	0	0	0	1
1	1	2	2	1	0	0	0	0	0	0	1	1	0	0	1	1	0	0	0	0	3	3	0	1	1	1	1	1	5	1	1	0	1	1	4	1	1	0	0	1	1	1	5	1	0	0	0	0	1
0	4	3	1	1	1	1	1	0	1	0	0	1	0	0	1	0	1	0	1	1	5	3	0	0	0	1	1	1	3	1	0	0	1	1	3	1	1	0	0	1	1	1	5	1	1	0	0	0	2
0	2	3	1	1	0	0	0	0	1	0	1	1	1	0	1	1	0	1	1	0	6	0	0	1	1	1	1	0	4	1	1	1	1	1	5	0	0	1	0	1	1	1	4	1	0	0	0	1	0
1	3	3	1	1	0	1	1	1	1	1	1	1	1	1	1	1	1	0	1	0	7	0	0	1	1	1	1	1	5	1	1	1	1	1	5	1	1	1	1	0	1	0	5	1	0	0	0	0	1
1	1	3	1	1	1	0	0	0	1	0	1	1	1	0	1	0	0	0	0	1	4	3	1	1	1	1	1	1	6	1	0	1	1	1	4	0	0	0	1	0	1	0	2	1	1	0	0	0	2
0	1	2	2	1	1	1	1	0	1	0	0	1	1	0	1	1	0	0	0	1	5	3	0	1	1	1	1	1	5	1	1	1	1	1	5	1	1	0	0	1	1	1	5	1	1	0	0	0	1
0	3	1	1	1	0	0	0	0	1	0	0	0	0	0	1	0	0	1	0	1	3	3	0	0	1	1	1	1	4	1	0	0	1	1	3	0	0	0	0	1	1	1	3	1	0	0	0	0	0
0	1	2	1	1	0	0	1	0	1	0	1	1	1	0	1	1	1	1	1	0	7	3	0	1	1	1	1	1	5	1	0	0	1	1	3	1	1	1	0	0	1	0	4	1	1	0	0	0	1
1	1	3	2	1	1	0	0	0	1	0	0	1	1	1	1	1	0	0	1	1	7	3	0	1	1	1	1	1	5	1	1	1	1	1	5	1	1	1	0	1	1	0	5	1	0	0	0	0	1
1	4	2	2	1	0	0	0	0	1	0	0	1	1	0	1	0	1	0	0	0	4	3	0	1	1	1	1	1	5	1	1	1	1	1	5	1	1	1	1	1	1	0	6	1	1	0	0	0	0
0	5	3	1	1	0	0	0	0	1	0	1	1	1	1	1	0	0	0	1	1	6	0	0	0	1	1	1	1	4	1	1	0	1	1	4	1	1	0	1	1	1	0	5	1	0	1	0	0	0
0	1	3	2	2	1	1	1	0	1	0	1	1	1	1	1	1	1	0	1	1	8	3	1	1	1	0	0	1	4	1	1	1	1	1	5	0	1	0	0	0	1	0	2	1	1	1	0	0	3
1	1	3	2	2	0	0	0	0	1	0	1	1	1	1	1	1	1	1	0	0	7	3	0	1	1	1	1	1	5	1	1	1	1	1	5	1	1	0	0	1	1	0	4	1	1	0	0	0	1
0	3	3	2	1	1	1	1	1	1	1	1	1	1	1	1	1	1	1	1	1	9	3	1	1	1	1	1	1	6	1	1	1	1	1	5	1	0	1	1	0	0	0	3	1	1	0	0	0	0
0	1	2	1	1	1	0	0	0	0	0	0	1	1	1	1	0	0	0	1	0	5	3	0	1	1	1	1	1	5	1	0	1	1	1	4	1	0	1	1	1	1	1	6	1	1	0	0	0	1
0	4	3	1	1	1	1	0	0	0	1	0	1	1	0	1	0	0	0	1	0	4	3	0	1	1	1	1	1	5	0	1	1	1	0	3	0	1	0	1	1	1	1	5	0	1	0	0	0	1
1	1	2	2	1	0	0	0	0	0	0	1	1	0	1	1	1	0	1	1	1	7	3	0	1	1	1	1	1	5	1	1	1	1	1	5	1	1	0	0	1	1	1	5	1	1	1	0	0	2
1	1	2	2	1	0	0	0	0	0	0	1	1	0	1	1	1	0	1	1	1	7	3	0	1	1	1	1	1	5	1	1	1	1	1	5	1	1	0	0	1	1	1	5	1	1	1	0	0	2
1	1	3	1	1	1	0	1	0	1	0	0	1	1	0	1	1	1	0	1	1	7	3	0	1	1	1	1	0	4	1	1	0	1	1	4	1	1	0	0	1	1	1	5	1	1	0	0	0	1
1	1	3	1	1	0	0	0	0	1	0	0	1	1	0	1	0	0	0	1	0	4	0	0	1	1	0	1	1	4	1	1	0	1	1	4	0	0	0	0	1	1	0	2	1	1	0	0	0	1
1	4	3	2	2	1	1	1	0	1	0	0	1	1	0	1	1	0	0	0	1	5	0	0	1	1	1	1	1	5	0	1	0	1	1	3	1	1	0	0	1	1	0	4	1	1	0	0	0	5
1	3	3	1	1	1	0	0	0	0	0	1	1	1	1	1	1	1	1	1	1	9	3	0	1	1	1	1	1	5	1	0	0	1	1	3	1	1	0	0	0	1	0	3	1	0	0	0	0	0
0	6	3	1	1	0	0	0	0	1	0	0	1	1	0	1	0	1	0	0	0	4	0	0	1	1	1	1	1	5	1	1	0	1	1	4	0	1	0	0	0	1	0	2	1	0	0	0	0	1
1	1	3	2	1	0	0	1	0	1	0	1	1	1	1	1	1	1	1	1	1	9	0	0	1	1	0	1	1	4	1	0	0	1	1	3	1	0	1	0	1	1	1	5	1	1	0	1	0	1
0	2	3	1	1	0	0	0	0	1	0	1	1	0	0	1	1	0	0	0	1	4	0	0	1	1	1	1	1	5	1	1	1	1	1	5	0	0	1	0	0	1	0	2	1	1	0	0	0	2
1	2	3	0	2	0	0	1	0	1	1	1	1	1	0	1	1	1	0	0	0	5	6	0	1	1	1	1	0	4	1	1	0	1	0	3	1	1	0	0	1	1	1	5	1	1	1	0	0	2
1	4	3	2	2	1	0	0	0	1	0	1	1	1	0	1	1	1	0	1	1	7	3	0	1	1	1	1	1	5	1	0	0	1	1	3	1	1	0	0	1	1	1	5	1	0	0	0	0	1
1	1	3	1	1	0	0	0	0	1	0	1	1	1	0	1	0	1	1	1	1	7	3	0	1	0	1	1	1	4	1	0	0	1	0	2	1	1	0	0	1	1	1	5	1	0	0	0	1	1
1	1	2	1	1	1	0	0	0	1	1	1	1	1	1	1	0	0	0	0	1	5	3	1	1	1	1	1	1	6	1	1	1	1	1	5	1	1	0	0	1	1	1	5	1	1	0	0	0	1
1	2	3	1	1	0	0	0	0	0	0	1	1	1	1	1	1	1	0	1	1	8	3	1	1	1	0	0	1	4	1	1	1	1	1	5	1	1	0	0	1	1	0	4	1	1	0	0	0	1
0	6	3	1	1	0	0	0	0	1	0	1	0	1	1	1	0	1	0	0	0	4	5	0	1	1	1	1	1	5	1	1	1	1	1	5	1	1	0	0	1	1	0	4	1	0	0	0	0	1
0	6	3	1	1	1	1	1	0	1	1	0	1	1	0	1	1	1	1	1	1	8	3	0	1	1	1	1	1	5	1	1	0	1	1	4	0	1	1	1	0	1	0	4	1	0	0	0	0	1
0	1	3	2	2	0	0	1	0	1	0	0	1	1	0	1	1	1	0	1	1	7	3	0	1	1	1	1	1	5	1	1	0	1	1	4	1	1	0	0	1	1	1	5	1	1	1	0	0	1
1	2	2	1	1	1	1	1	0	1	1	1	1	1	1	1	1	1	0	1	1	8	5	0	1	1	0	0	1	3	1	1	1	1	1	5	0	1	1	1	0	1	0	4	1	1	0	1	0	4
0	1	3	1	1	1	0	0	0	1	0	1	1	1	0	1	1	0	0	1	1	6	3	0	1	1	1	1	1	5	1	1	0	1	1	4	1	1	0	0	1	1	1	5	1	1	0	0	0	1
1	1	2	1	1	1	0	0	0	0	0	0	1	1	1	1	1	1	0	1	1	8	3	0	1	1	1	1	1	5	1	0	1	1	1	4	1	1	0	0	1	1	1	5	1	0	1	0	0	1
1	2	3	1	1	1	0	1	0	1	0	1	1	1	1	1	0	1	0	1	0	6	3	0	1	1	1	1	1	5	1	0	0	1	1	3	1	1	1	1	1	1	0	6	1	0	1	0	0	4
0	4	3	1	2	1	1	0	0	0	0	1	1	1	1	1	0	0	0	1	1	6	5	1	1	1	1	1	0	5	1	1	1	1	1	5	1	0	1	0	1	1	0	4	1	0	1	0	0	3
0	4	3	1	2	0	1	1	0	1	0	0	1	1	0	1	0	0	0	0	0	3	0	0	1	1	1	1	1	5	1	1	0	1	1	4	1	1	0	0	1	1	0	4	1	0	1	0	0	2
1	2	3	1	1	0	0	0	0	1	0	1	1	1	0	1	1	1	0	1	0	6	3	0	1	1	1	1	1	5	1	1	1	1	1	5	1	1	1	0	0	1	1	5	1	0	0	0	0	2
1	1	3	2	1	1	1	0	0	1	1	1	1	1	1	1	1	1	1	1	1	9	3	0	1	1	1	1	1	5	1	1	1	1	1	5	1	1	0	0	1	1	1	5	1	1	0	0	0	1
1	1	3	2	2	1	0	0	0	1	0	1	1	1	0	1	0	0	0	0	1	4	0	0	1	1	1	1	1	5	1	0	1	1	1	4	1	1	0	0	1	1	0	4	1	0	0	0	0	1
1	2	3	2	1	1	1	0	0	0	0	1	1	1	1	1	1	1	1	1	1	9	3	0	1	1	1	1	1	5	1	1	1	1	1	5	1	0	1	0	1	1	0	4	1	1	0	0	0	1
0	1	3	1	1	1	1	1	1	1	0	1	1	1	0	1	0	0	1	0	1	5	3	0	1	1	0	1	1	4	1	1	1	1	1	5	1	1	0	0	1	1	0	4	1	1	0	0	0	1
1	0	2	2	1	1	1	0	0	1	0	1	1	1	1	1	1	0	0	1	1	7	0	1	1	0	0	1	1	4	0	1	1	1	1	4	1	1	0	0	1	1	1	5	1	1	0	0	0	1
0	1	3	1	1	1	1	0	0	1	0	1	1	0	1	1	1	1	0	1	1	7	3	0	0	0	1	1	1	3	1	1	1	1	1	5	0	0	1	1	0	1	0	3	1	0	0	0	0	2
1	1	3	2	1	1	0	0	0	1	0	1	1	0	1	1	1	1	0	1	0	6	3	0	1	1	1	1	1	5	1	1	1	1	1	5	1	1	0	0	1	1	1	5	1	1	0	0	0	0
1	1	3	1	1	1	1	0	0	0	0	1	1	1	0	1	1	0	0	0	1	5	3	0	1	1	0	1	1	4	1	1	1	1	1	5	1	0	1	1	1	1	0	5	1	1	0	0	0	1
0	3	2	1	1	1	1	1	0	0	0	0	1	1	0	1	0	0	0	0	0	3	0	0	1	0	1	1	0	3	0	1	1	1	1	4	1	0	0	0	0	1	0	2	1	1	1	0	0	3
0	6	3	1	1	1	0	0	0	1	0	0	1	0	0	1	0	1	0	1	1	5	3	0	1	1	1	1	1	5	1	1	1	1	1	5	0	1	1	1	1	1	0	5	0	0	1	0	0	0
0	6	3	1	1	1	0	1	0	1	0	0	1	1	0	1	0	1	0	1	1	6	3	0	1	1	1	1	1	5	1	1	1	1	1	5	1	1	1	0	1	1	0	5	0	1	1	0	0	0
0	2	3	2	2	1	1	0	0	1	1	1	1	1	0	1	0	1	1	1	1	7	8	0	1	1	1	1	1	5	1	0	1	1	1	4	1	0	0	0	1	1	0	3	1	0	1	0	0	3
0	4	3	1	1	1	1	0	0	1	0	0	1	1	1	1	1	1	1	1	1	9	3	0	1	1	1	1	1	5	1	1	0	1	1	4	1	1	0	0	1	1	1	5	1	0	0	0	0	4
1	1	3	1	1	1	0	0	0	1	0	1	1	1	0	1	1	0	1	1	1	7	3	0	1	1	1	1	1	5	1	0	1	1	1	4	1	1	1	1	1	1	0	6	1	1	0	0	0	1
1	1	3	2	2	1	1	1	0	1	0	1	1	1	1	1	1	1	0	1	1	8	3	1	1	1	0	0	1	4	1	1	1	1	1	5	1	1	0	0	1	1	0	4	1	1	0	0	0	1
0	1	3	1	1	0	1	0	0	1	0	1	1	1	0	1	1	1	1	0	1	7	3	0	1	1	0	1	1	4	1	0	1	1	1	4	1	1	0	0	1	1	1	5	1	1	0	0	0	1
0	1	3	1	1	0	1	1	1	0	0	0	1	1	0	1	0	1	1	0	0	5	3	1	1	1	0	0	1	4	1	0	1	1	1	4	1	1	0	0	1	1	1	5	1	1	0	1	0	1
1	2	3	2	2	1	0	0	0	1	1	1	1	1	0	1	1	1	1	1	1	8	3	1	1	1	1	1	1	6	1	1	1	1	1	5	1	1	0	0	1	1	1	5	1	1	0	0	0	1
0	2	3	1	1	1	0	0	0	1	0	1	1	1	0	1	1	1	0	1	1	7	3	0	1	1	1	1	1	5	1	1	1	1	1	5	1	1	0	0	1	1	1	5	1	1	0	0	0	1
1	1	2	1	1	0	0	0	0	0	0	1	1	1	0	1	1	0	0	1	0	5	3	0	1	1	1	1	0	4	1	1	1	1	1	5	0	1	1	1	0	1	1	5	0	1	0	0	0	1
1	1	3	1	1	1	1	1	1	1	1	1	1	1	0	1	1	0	0	1	1	6	0	0	1	1	1	1	1	5	1	1	1	1	1	5	1	1	1	1	0	1	0	5	1	1	0	0	0	2
1	1	2	1	2	1	0	0	0	0	1	1	1	1	1	1	0	1	0	0	0	5	0	0	1	1	1	1	1	5	1	1	1	1	1	5	1	1	0	0	1	1	1	5	1	0	0	0	0	4
1	2	3	1	1	0	0	0	0	0	0	1	1	1	0	1	1	1	1	1	0	7	0	0	1	1	1	1	1	5	1	1	1	1	1	5	0	1	1	1	0	1	0	4	1	1	0	0	0	3
1	0	2	1	1	0	0	0	0	0	0	1	1	1	1	1	0	0	0	0	0	4	3	0	1	1	1	1	1	5	1	1	0	1	1	4	1	1	0	0	1	1	1	5	0	1	1	0	0	1
1	4	3	2	1	1	0	0	0	0	0	1	1	1	0	1	1	0	0	0	0	4	3	0	1	0	1	1	1	4	1	0	0	1	0	2	1	1	0	0	1	1	0	4	0	1	0	0	0	1
1	3	3	1	1	1	1	1	0	1	1	0	1	1	0	1	0	1	0	0	0	4	3	0	1	1	1	1	1	5	1	1	1	1	1	5	0	1	0	1	1	1	0	4	1	0	0	0	0	2
0	1	3	2	1	1	0	1	0	0	0	1	1	1	1	1	0	1	1	1	1	8	3	0	1	1	1	1	1	5	1	1	1	1	1	5	0	0	0	0	1	1	0	2	1	1	1	0	0	2
1	1	2	2	2	1	0	0	0	1	0	1	1	0	0	1	0	1	0	0	1	4	5	0	1	1	1	1	1	5	1	1	1	1	1	5	1	1	0	1	1	1	0	5	1	1	0	0	0	0
0	1	3	2	1	1	0	0	0	0	0	0	1	1	1	1	1	1	0	0	0	6	3	1	1	1	0	0	1	4	1	0	0	1	1	3	0	0	1	1	1	1	1	5	1	0	0	0	0	3
1	2	3	1	1	0	0	0	0	0	0	1	1	1	0	1	0	1	1	0	0	5	3	1	1	1	0	1	1	5	0	1	1	1	1	4	0	0	0	0	1	0	0	1	1	1	0	0	0	4
1	1	3	2	2	1	1	0	0	1	0	0	1	1	0	1	0	1	0	0	0	4	0	0	1	0	1	1	1	4	1	1	1	1	1	5	1	1	0	0	1	1	1	5	1	0	0	0	0	1
0	1	3	1	1	0	0	0	0	1	0	1	1	1	0	1	0	0	0	1	1	5	3	0	1	1	1	1	1	5	1	1	1	1	1	5	1	1	1	0	0	1	0	4	1	1	0	0	0	1
1	1	2	1	1	1	0	1	0	0	1	0	1	1	1	1	0	0	0	1	0	5	3	1	1	1	1	0	1	5	1	0	1	1	1	4	1	1	0	0	1	1	1	5	1	1	1	0	0	0
0	2	3	1	1	1	1	1	1	1	1	1	1	1	1	1	1	0	1	1	1	8	3	1	1	1	1	1	1	6	1	1	1	1	1	5	1	1	0	0	1	1	1	5	1	1	0	1	0	2
1	1	2	1	1	1	0	1	0	1	0	0	1	0	0	1	1	0	0	1	0	4	3	0	0	1	1	1	1	4	1	0	0	1	1	3	1	1	0	0	1	1	1	5	1	0	0	0	0	2
1	1	3	1	1	1	0	0	0	0	0	1	1	1	0	1	1	0	1	0	0	5	3	0	1	1	1	1	1	5	0	1	1	1	0	3	1	1	0	0	1	1	0	4	1	1	0	0	0	1
1	1	2	1	1	1	0	0	0	0	0	0	1	1	0	1	1	1	0	1	1	7	1	0	1	1	0	0	1	3	1	0	1	1	1	4	1	1	1	0	0	1	0	4	1	0	0	0	1	1
1	2	3	1	1	0	0	0	0	0	0	1	1	0	1	1	0	0	0	0	1	4	3	0	1	1	1	1	1	5	1	0	0	1	1	3	1	1	0	0	1	1	0	4	1	0	0	0	1	1
1	1	3	2	1	1	0	0	0	1	0	1	1	1	0	0	1	0	1	1	0	5	3	1	1	1	1	1	1	6	0	1	0	1	1	3	1	1	0	0	1	1	1	5	1	1	0	0	0	1
0	1	2	2	2	1	0	0	0	0	0	0	1	1	0	1	0	1	0	0	0	4	0	1	1	1	0	0	1	4	1	1	0	1	1	4	1	1	0	0	1	1	1	5	1	0	0	0	0	1
1	3	3	2	1	1	0	0	0	1	0	1	1	0	0	1	1	1	0	1	1	6	3	0	1	1	1	1	1	5	1	0	0	1	1	3	1	1	0	0	1	1	1	5	1	0	0	0	0	1
0	1	3	2	1	0	0	0	0	0	0	1	1	1	1	1	1	1	1	1	0	8	2	1	1	1	0	0	1	4	1	1	1	1	1	5	1	1	0	0	1	1	1	5	1	0	0	0	0	0
1	1	3	2	2	1	1	0	0	1	1	0	1	0	0	1	1	1	1	1	0	6	0	0	0	0	1	1	1	3	1	1	1	1	1	5	0	1	0	0	0	1	0	2	0	0	1	0	0	1
0	1	3	1	1	0	0	0	0	1	0	1	1	1	0	1	0	0	0	0	0	3	3	0	1	1	0	1	1	4	1	1	0	1	1	4	0	1	0	0	1	1	0	3	1	0	0	0	0	0
0	2	3	1	1	1	0	0	0	0	0	0	1	0	0	1	1	0	0	1	1	5	3	0	0	1	1	1	1	4	1	0	0	1	0	2	1	1	0	0	1	1	1	5	1	0	0	0	0	2
1	1	3	1	1	1	1	1	0	1	0	1	1	1	0	1	0	0	1	1	0	5	3	0	1	1	1	1	1	5	1	0	1	1	1	4	1	1	0	0	1	1	1	5	1	1	0	0	0	2
0	2	2	1	1	0	1	1	1	1	0	1	1	1	1	1	1	1	1	1	1	9	8	0	0	1	1	1	1	4	1	1	1	1	1	5	1	1	0	0	1	1	1	5	1	0	0	0	0	4
1	2	3	2	2	1	1	1	0	1	1	1	1	1	0	1	1	0	1	1	1	7	3	1	1	1	1	1	1	6	1	1	1	1	1	5	1	1	1	1	1	1	1	7	1	1	0	0	0	1
1	0	2	1	1	1	1	1	0	1	1	1	1	1	0	1	1	0	0	1	0	5	1	1	1	1	0	1	1	5	1	1	1	1	1	5	1	0	0	0	1	1	1	4	1	0	0	0	0	2
1	3	3	2	2	1	0	0	0	0	1	0	1	1	0	1	1	0	0	1	1	6	3	0	1	1	1	1	1	5	1	0	0	1	1	3	1	1	0	0	1	1	1	5	1	0	0	0	0	2
1	3	2	1	1	0	1	0	0	0	0	0	1	1	0	1	1	0	0	0	0	4	3	0	0	1	1	1	1	4	1	0	0	1	0	2	0	1	0	0	0	1	0	2	1	1	0	0	0	1
1	1	2	1	1	0	0	1	1	1	0	1	1	1	0	1	1	0	1	1	0	6	3	0	1	1	1	1	1	5	1	0	0	1	1	3	1	1	1	1	0	1	0	5	1	1	0	0	0	2
1	3	3	1	1	1	1	0	0	1	0	1	1	1	1	1	1	1	0	1	1	8	0	0	1	1	1	1	1	5	1	1	0	1	1	4	1	1	0	0	1	1	1	5	1	1	0	0	0	7
0	2	3	1	1	1	1	1	1	1	1	1	1	1	1	1	1	0	0	1	0	6	3	0	1	1	1	1	1	5	1	1	1	1	1	5	0	0	1	0	1	1	1	4	1	1	0	0	0	2
0	2	3	1	1	1	1	1	1	1	1	1	1	1	1	1	1	0	0	1	0	6	3	0	1	1	1	1	1	5	1	1	1	1	1	5	0	0	1	0	1	1	1	4	1	1	0	0	0	2
1	1	3	2	1	1	0	0	0	1	1	1	1	1	0	1	0	1	0	1	1	6	0	0	0	1	1	1	0	3	1	0	1	1	1	4	1	0	1	1	1	1	1	6	1	1	1	0	0	1
1	1	2	2	1	1	0	1	0	0	0	0	1	1	0	1	1	0	0	0	0	4	3	0	1	1	0	1	1	4	1	1	1	1	1	5	1	1	1	1	1	1	1	7	1	0	0	0	0	1
1	1	3	1	1	0	0	1	0	1	0	0	1	1	0	1	0	0	0	1	1	5	0	0	1	1	1	1	0	4	1	1	0	1	1	4	1	1	0	0	1	1	1	5	1	0	0	0	0	1
1	1	3	1	1	0	0	0	0	1	0	1	1	1	0	1	1	0	0	0	0	4	3	0	1	1	1	1	1	5	1	1	1	1	1	5	1	1	0	0	1	1	1	5	1	1	0	0	0	1
1	5	3	1	1	1	0	0	0	1	1	1	1	1	0	1	1	0	0	0	0	4	3	1	1	1	0	0	0	3	1	1	1	1	1	5	0	1	1	1	0	1	0	4	0	0	0	0	1	1
1	0	3	2	2	1	0	0	0	0	0	1	1	1	0	1	1	0	0	0	0	4	3	0	1	1	0	1	1	4	1	1	1	1	1	5	1	1	0	0	1	1	1	5	1	1	0	0	0	1
0	1	2	2	2	0	0	0	0	0	0	1	1	1	1	1	1	1	1	1	1	9	3	0	1	1	1	1	1	5	1	1	1	1	1	5	1	1	0	0	1	1	1	5	1	1	0	0	0	1
0	1	3	2	2	1	1	1	0	1	0	1	1	1	0	1	0	0	1	1	0	5	3	0	1	1	1	1	1	5	1	1	1	1	1	5	1	0	0	0	1	1	0	3	1	1	1	0	0	0
1	4	3	1	1	1	0	0	0	1	0	1	1	1	1	1	0	0	0	1	0	5	0	0	1	1	1	1	1	5	1	1	1	1	1	5	1	1	0	1	1	1	1	6	1	1	0	0	0	2
1	3	3	2	2	1	0	0	0	0	0	0	1	1	0	1	0	0	1	1	0	5	3	0	0	0	1	1	1	3	0	0	0	1	1	2	1	1	0	0	1	0	1	4	1	0	1	0	0	5
1	3	3	2	2	1	0	0	0	0	0	0	1	1	0	1	0	0	1	1	0	5	3	0	0	0	1	1	1	3	0	0	0	1	1	2	1	1	0	0	1	0	1	4	1	0	1	0	0	5
1	3	3	1	1	1	1	1	0	0	0	1	1	1	0	1	0	1	0	1	1	6	3	0	1	1	1	0	1	4	1	1	1	1	1	5	1	1	0	0	1	1	0	4	1	1	0	0	0	2
1	1	3	1	1	1	0	0	0	0	0	0	0	1	0	1	0	1	1	1	1	6	3	0	1	1	1	1	1	5	1	0	1	1	1	4	1	0	0	0	1	1	0	3	1	1	1	0	0	3
1	2	1	1	1	0	0	0	0	0	0	1	1	1	1	1	1	0	0	1	1	7	3	0	1	0	1	1	1	4	1	1	1	1	1	5	1	1	0	0	1	1	1	5	1	1	1	0	0	7
0	0	2	2	1	1	0	0	0	0	1	0	1	1	1	1	1	0	0	1	0	6	3	0	0	0	1	1	1	3	1	0	0	1	1	3	1	1	0	1	0	1	0	4	1	1	1	0	0	1
1	1	3	1	1	1	1	1	0	0	1	1	1	1	0	1	1	1	0	1	1	7	0	1	1	1	0	0	1	4	1	1	1	1	1	5	1	1	0	0	1	1	1	5	1	0	1	0	0	5
1	1	3	2	1	0	0	0	0	0	0	1	1	1	1	1	0	0	1	1	0	6	3	0	1	1	1	1	1	5	1	1	0	1	1	4	1	0	1	0	0	1	1	4	1	1	0	0	0	2
1	1	3	1	1	0	1	0	0	1	0	1	1	1	1	1	0	1	0	0	0	5	3	0	1	1	1	1	1	5	1	1	1	1	1	5	1	1	1	0	1	1	0	5	1	1	0	0	0	1
0	1	3	0	2	1	0	0	0	0	0	1	1	1	0	1	0	0	0	1	0	4	3	0	1	1	1	1	1	5	1	1	0	1	1	4	1	1	0	0	0	1	0	3	1	1	0	0	0	1
1	4	3	1	1	1	1	1	1	1	1	1	1	1	1	1	1	0	0	1	1	7	3	1	1	1	0	0	1	4	1	1	1	1	1	5	1	1	0	0	0	1	0	3	1	1	1	0	0	6
1	4	2	1	1	0	0	0	0	0	0	1	1	0	0	0	0	0	0	0	0	1	3	0	0	1	1	1	0	3	0	0	0	1	0	1	1	1	0	0	1	1	1	5	1	0	0	0	0	4
0	5	3	1	1	0	0	0	0	0	0	1	1	1	0	1	1	0	1	0	0	5	3	0	1	1	1	1	1	5	1	0	1	1	1	4	1	1	1	1	0	1	0	5	1	1	1	0	0	1
0	2	3	2	2	1	0	1	1	0	0	1	1	1	1	1	0	0	0	1	1	6	3	0	1	1	1	1	1	5	1	1	1	1	1	5	1	1	0	0	1	1	1	5	1	1	0	0	0	1
1	4	3	1	1	1	0	1	0	1	1	0	1	1	0	1	1	1	0	1	1	7	3	0	1	1	1	1	1	5	1	1	0	1	1	4	0	1	0	1	0	0	0	2	1	1	0	0	0	4
1	2	1	2	2	1	1	0	0	0	0	0	1	1	1	1	0	0	1	0	1	6	3	0	1	1	1	1	1	5	1	1	1	1	1	5	0	1	1	0	0	0	0	2	0	1	1	0	0	6
1	2	3	1	2	0	1	0	0	1	1	1	1	1	0	1	1	1	0	1	0	6	3	0	1	1	1	1	1	5	1	1	1	1	1	5	1	1	0	0	1	1	0	4	1	1	1	0	0	7
1	5	3	1	2	1	1	1	0	1	1	1	1	1	0	1	0	1	0	0	1	5	3	0	1	1	1	1	1	5	1	1	1	1	1	5	1	1	1	1	0	1	0	5	1	1	0	0	0	1
1	2	3	1	1	0	0	0	0	0	0	1	1	1	0	1	1	1	1	1	1	8	3	0	1	1	1	1	1	5	1	0	1	1	1	4	1	1	0	0	1	1	1	5	1	0	0	0	0	1
0	1	2	1	1	1	0	1	0	0	0	1	1	0	0	1	0	1	0	0	0	3	3	1	1	1	1	0	1	5	1	1	1	1	1	5	1	1	0	0	1	1	1	5	1	0	0	0	0	2
0	1	3	2	1	0	0	0	0	1	0	0	1	1	1	1	1	0	1	1	1	8	3	0	1	1	1	1	1	5	1	1	1	1	1	5	1	1	1	1	0	1	1	6	1	1	0	0	0	1
1	1	3	1	1	1	0	0	0	0	0	0	1	0	0	1	1	0	0	1	1	5	8	1	0	1	1	1	1	5	1	0	1	1	1	4	0	1	1	0	1	1	0	4	1	0	1	0	0	3
0	1	2	1	1	1	0	0	0	1	0	1	1	1	1	1	1	1	0	1	0	7	3	0	1	1	1	1	1	5	1	1	1	1	1	5	1	1	1	1	0	1	1	6	1	1	1	0	0	1
1	1	3	2	1	1	0	0	0	1	0	1	1	1	1	1	1	0	0	0	1	6	3	0	1	1	1	1	1	5	1	0	0	1	1	3	1	1	0	0	1	1	0	4	1	1	0	0	0	1
0	1	3	2	1	0	0	0	0	1	0	1	1	0	0	1	1	1	0	1	0	5	3	0	1	1	1	1	1	5	1	1	1	1	1	5	1	1	0	0	1	1	1	5	1	1	0	0	0	1
0	1	2	1	1	0	1	0	0	0	0	0	1	1	1	1	1	1	0	0	0	6	3	0	0	1	1	1	1	4	1	1	1	1	1	5	1	1	0	0	0	1	0	3	1	0	0	0	0	1
0	1	3	1	1	1	0	1	0	0	0	1	1	1	1	1	1	1	0	1	1	8	3	1	1	1	1	1	1	6	1	1	1	1	1	5	1	1	1	0	0	1	0	4	1	1	0	0	0	1
0	2	2	1	1	1	0	0	0	0	0	1	1	1	1	1	1	1	1	1	1	9	3	0	1	1	1	1	1	5	1	1	1	1	1	5	1	1	0	0	0	1	0	3	1	1	0	1	0	1
0	1	3	1	1	1	0	0	0	0	0	0	1	1	1	1	0	1	1	1	0	7	0	0	0	0	1	1	1	3	1	0	0	0	0	1	0	0	0	0	1	1	1	3	0	0	1	0	0	2
1	2	2	1	1	0	1	0	0	0	0	1	1	1	1	1	1	1	1	1	1	9	0	0	1	1	1	0	0	3	1	1	1	1	1	5	0	1	0	0	1	0	0	2	0	0	0	1	0	2
0	1	3	1	1	0	0	0	0	1	0	1	1	1	1	1	1	1	1	1	1	9	3	0	0	1	0	1	1	3	1	1	1	1	1	5	1	1	1	0	1	1	0	5	1	1	0	0	0	1
0	1	2	1	2	1	0	0	0	0	0	1	1	1	0	1	0	0	0	1	0	4	3	0	1	1	1	1	1	5	1	1	1	1	1	5	1	1	0	0	0	1	0	3	1	0	1	0	0	1
0	1	3	2	1	0	0	0	0	1	0	0	1	1	1	1	1	1	1	1	1	9	8	0	1	1	1	1	1	5	1	0	1	1	1	4	1	1	0	0	1	1	1	5	1	0	1	0	0	2
1	0	2	2	1	0	0	1	1	0	0	1	1	0	0	1	0	0	0	1	0	3	3	1	1	1	1	1	1	6	1	0	1	1	1	4	0	0	0	0	0	1	0	1	1	0	0	0	0	2
1	4	2	1	1	0	1	0	0	0	1	0	1	1	0	1	0	0	0	0	1	4	3	0	0	1	1	1	0	3	1	1	1	1	1	5	1	1	0	0	1	1	0	4	1	0	0	0	0	2
1	5	3	2	1	1	1	0	0	0	0	1	1	1	0	1	1	1	1	1	1	8	3	0	1	1	1	1	1	5	1	1	0	1	1	4	0	1	1	1	0	1	0	4	1	1	1	0	0	1
0	1	3	1	1	1	0	0	0	0	0	0	1	1	0	1	0	0	1	0	0	4	0	1	0	1	1	1	1	5	1	1	0	1	1	4	1	1	0	0	1	1	1	5	1	1	1	0	0	2
1	0	2	2	2	1	1	1	0	0	1	0	1	0	1	1	1	0	0	1	0	5	3	0	1	1	1	1	1	5	1	1	1	1	1	5	0	0	0	0	0	1	0	1	1	0	0	0	0	5
1	1	2	2	1	0	0	0	0	0	0	1	1	0	1	0	1	1	1	0	0	5	5	0	0	0	1	1	1	3	0	1	1	0	1	3	0	0	0	0	1	1	0	2	0	0	1	0	0	1
1	3	3	2	1	1	1	1	0	1	1	1	1	1	0	1	1	1	0	1	1	7	5	0	1	1	1	0	1	4	1	0	1	1	1	4	0	0	1	1	0	0	0	2	1	1	1	0	0	2
1	2	3	1	1	1	0	1	0	0	0	1	1	1	1	1	1	0	1	0	0	6	0	0	1	1	0	0	1	3	0	1	1	1	1	4	1	1	1	1	1	1	1	7	1	0	1	0	0	4
0	1	3	1	1	1	0	0	1	0	0	0	1	1	0	1	1	0	0	1	1	6	3	0	1	1	1	1	1	5	1	1	1	1	1	5	1	1	1	0	1	1	1	6	1	1	1	0	0	1
0	1	2	2	1	0	0	1	0	1	0	0	1	1	0	1	1	0	0	0	0	4	4	0	1	1	1	1	1	5	1	1	0	1	1	4	1	1	0	0	1	1	1	5	1	0	0	0	0	1
[truncated: 3 more columns]
